# Supplementary material for: Identifying Neural Tipping Points of Freezing of Gait in Parkinson’s Disease: An EEG-Based Early Warning and Closed-Loop Stimulation Study
Source: Research Square preprint supplement (doi:10.21203/rs.3.rs-7814436/v1), 2025-11-14
Supplement: Supplementary file 1 [file 6df86bb556fb387815251c9b.xlsx]

## Sheet: EEG Group Comparisons
EEG Marker	Timepoint	Closed-Loop (n=50)	Control (n=50)	P-value
EEG Variance	Baseline	1.01 ± 0.10	1.00 ± 0.10	0.092
EEG Lag-1 Autocorr	Baseline	0.30 ± 0.05	0.30 ± 0.05	0.001
EEG Beta Synchrony	Baseline	2.02 ± 0.31	1.97 ± 0.31	0.000
EEG Network Entropy	Baseline	0.69 ± 0.05	0.69 ± 0.05	0.021
EEG Variance	3-mo FU	0.51 ± 0.10	0.85 ± 0.12	0.000
EEG Lag-1 Autocorr	3-mo FU	0.15 ± 0.06	0.26 ± 0.04	0.000
EEG Beta Synchrony	3-mo FU	0.93 ± 0.29	1.70 ± 0.33	0.000
EEG Network Entropy	3-mo FU	0.34 ± 0.05	0.59 ± 0.05	0.000

## Sheet: EEG-FOG Correlations
EEG Marker	Correlation with FOG Episodes (r)	P-value
EEG Variance	0.58	0.000
EEG Lag-1 Autocorr	0.52	0.000
EEG Beta Synchrony	0.53	0.000
EEG Network Entropy	0.63	0.000

## Sheet: Raw Data (Simulated)
Group	Timepoint	FOG Episodes / Week	FOG Duration (s)	Gait Velocity (m/s)	Stride Variability (CV)	UPDRS-III Gait Subscore	FOG-Q Total	EEG Variance	EEG Lag-1 Autocorr	EEG Beta Synchrony	EEG Network Entropy
Closed-Loop	Baseline	18.5071	12.5868	0.715741	0.0591423	5.05261	11.1906	0.951638	0.296821	2.12563	0.656208
Closed-Loop	Baseline	18.5071	12.5868	0.715741	0.0591423	5.05261	11.1906	1.08418	0.227454	2.06618	0.65971
Closed-Loop	Baseline	18.5071	12.5868	0.715741	0.0591423	5.05261	11.1906	0.894878	0.303779	1.61871	0.750514
Closed-Loop	Baseline	18.5071	12.5868	0.715741	0.0591423	5.05261	11.1906	0.746823	0.352443	1.88643	0.697782
Closed-Loop	Baseline	18.5071	12.5868	0.715741	0.0591423	5.05261	11.1906	0.977289	0.298539	2.2696	0.768923
Closed-Loop	Baseline	18.5071	12.5868	0.715741	0.0591423	5.05261	11.1906	0.985824	0.338756	2.01131	0.666424
Closed-Loop	Baseline	18.5071	12.5868	0.715741	0.0591423	5.05261	11.1906	1.01356	0.247724	2.19786	0.697261
Closed-Loop	Baseline	18.5071	12.5868	0.715741	0.0591423	5.05261	11.1906	1.07285	0.298687	2.52995	0.653879
Closed-Loop	Baseline	18.5071	12.5868	0.715741	0.0591423	5.05261	11.1906	1.06376	0.268774	2.31158	0.700368
Closed-Loop	Baseline	18.5071	12.5868	0.715741	0.0591423	5.05261	11.1906	1.02588	0.337349	2.02795	0.626073
Closed-Loop	Baseline	18.5071	12.5868	0.715741	0.0591423	5.05261	11.1906	1.11955	0.301575	1.8467	0.675618
Closed-Loop	Baseline	18.5071	12.5868	0.715741	0.0591423	5.05261	11.1906	0.848103	0.334504	1.23394	0.628187
Closed-Loop	Baseline	18.5071	12.5868	0.715741	0.0591423	5.05261	11.1906	1.05046	0.354386	1.94948	0.734696
Closed-Loop	Baseline	18.5071	12.5868	0.715741	0.0591423	5.05261	11.1906	1.06265	0.334581	1.9022	0.735829
Closed-Loop	Baseline	18.5071	12.5868	0.715741	0.0591423	5.05261	11.1906	0.876044	0.313656	2.11711	0.613487
Closed-Loop	Baseline	18.5071	12.5868	0.715741	0.0591423	5.05261	11.1906	0.849713	0.250089	1.95383	0.766694
Closed-Loop	Baseline	18.5071	12.5868	0.715741	0.0591423	5.05261	11.1906	0.925406	0.299861	1.90388	0.824871
Closed-Loop	Baseline	18.5071	12.5868	0.715741	0.0591423	5.05261	11.1906	0.933846	0.273345	1.46618	0.7023
Closed-Loop	Baseline	18.5071	12.5868	0.715741	0.0591423	5.05261	11.1906	1.07534	0.282797	1.71801	0.667944
Closed-Loop	Baseline	18.5071	12.5868	0.715741	0.0591423	5.05261	11.1906	0.938546	0.281273	2.143	0.841217
Closed-Loop	Baseline	18.5071	12.5868	0.715741	0.0591423	5.05261	11.1906	0.914365	0.251004	2.51477	0.634052
Closed-Loop	Baseline	18.5071	12.5868	0.715741	0.0591423	5.05261	11.1906	0.938837	0.202133	1.97074	0.701005
Closed-Loop	Baseline	18.5071	12.5868	0.715741	0.0591423	5.05261	11.1906	1.11186	0.266593	2.09834	0.708981
Closed-Loop	Baseline	18.5071	12.5868	0.715741	0.0591423	5.05261	11.1906	1.0013	0.309669	2.28574	0.767257
Closed-Loop	Baseline	18.5071	12.5868	0.715741	0.0591423	5.05261	11.1906	0.982075	0.232591	1.75673	0.717987
Closed-Loop	Baseline	18.5071	12.5868	0.715741	0.0591423	5.05261	11.1906	0.988999	0.300784	2.11004	0.675068
Closed-Loop	Baseline	18.5071	12.5868	0.715741	0.0591423	5.05261	11.1906	1.12921	0.395013	1.77785	0.652441
Closed-Loop	Baseline	18.5071	12.5868	0.715741	0.0591423	5.05261	11.1906	0.925083	0.351153	2.25945	0.682909
Closed-Loop	Baseline	18.5071	12.5868	0.715741	0.0591423	5.05261	11.1906	1.13155	0.382177	2.04542	0.649654
Closed-Loop	Baseline	18.5071	12.5868	0.715741	0.0591423	5.05261	11.1906	1.02105	0.319556	2.08954	0.702391
Closed-Loop	Baseline	18.5071	12.5868	0.715741	0.0591423	5.05261	11.1906	0.983958	0.358375	1.76522	0.67179
Closed-Loop	Baseline	18.5071	12.5868	0.715741	0.0591423	5.05261	11.1906	1.25009	0.263802	2.21211	0.625298
Closed-Loop	Baseline	18.5071	12.5868	0.715741	0.0591423	5.05261	11.1906	0.894436	0.267783	2.62541	0.762757
Closed-Loop	Baseline	18.5071	12.5868	0.715741	0.0591423	5.05261	11.1906	0.964631	0.163043	1.69763	0.675116
Closed-Loop	Baseline	18.5071	12.5868	0.715741	0.0591423	5.05261	11.1906	0.876757	0.359307	1.89807	0.636593
Closed-Loop	Baseline	18.5071	12.5868	0.715741	0.0591423	5.05261	11.1906	1.09525	0.377016	2.06948	0.691587
Closed-Loop	Baseline	18.5071	12.5868	0.715741	0.0591423	5.05261	11.1906	1.16892	0.272341	2.23592	0.703419
Closed-Loop	Baseline	18.5071	12.5868	0.715741	0.0591423	5.05261	11.1906	1.16699	0.287302	1.83214	0.612677
Closed-Loop	Baseline	18.5071	12.5868	0.715741	0.0591423	5.05261	11.1906	1.12239	0.262307	1.15009	0.716582
Closed-Loop	Baseline	18.5071	12.5868	0.715741	0.0591423	5.05261	11.1906	0.980238	0.319133	2.40776	0.647642
Closed-Loop	Baseline	18.5071	12.5868	0.715741	0.0591423	5.05261	11.1906	0.963476	0.356247	2.22815	0.785551
Closed-Loop	Baseline	18.5071	12.5868	0.715741	0.0591423	5.05261	11.1906	0.832883	0.212861	1.47712	0.726198
Closed-Loop	Baseline	18.5071	12.5868	0.715741	0.0591423	5.05261	11.1906	1.20359	0.320472	1.81773	0.680005
Closed-Loop	Baseline	18.5071	12.5868	0.715741	0.0591423	5.05261	11.1906	1.0469	0.286166	2.47045	0.662742
Closed-Loop	Baseline	18.5071	12.5868	0.715741	0.0591423	5.05261	11.1906	0.950804	0.30567	2.43434	0.694752
Closed-Loop	Baseline	18.5071	12.5868	0.715741	0.0591423	5.05261	11.1906	1.13281	0.32295	2.28159	0.73064
Closed-Loop	Baseline	18.5071	12.5868	0.715741	0.0591423	5.05261	11.1906	0.902724	0.29059	1.94717	0.698725
Closed-Loop	Baseline	18.5071	12.5868	0.715741	0.0591423	5.05261	11.1906	1.04066	0.294821	2.0249	0.689142
Closed-Loop	Baseline	18.5071	12.5868	0.715741	0.0591423	5.05261	11.1906	0.982737	0.289306	1.96072	0.702919
Closed-Loop	Baseline	18.5071	12.5868	0.715741	0.0591423	5.05261	11.1906	1.06387	0.348516	2.33847	0.669807
Closed-Loop	Baseline	22.711	19.3051	1.08749	0.0649211	9.13424	13.2027	0.951638	0.296821	2.12563	0.656208
Closed-Loop	Baseline	22.711	19.3051	1.08749	0.0649211	9.13424	13.2027	1.08418	0.227454	2.06618	0.65971
Closed-Loop	Baseline	22.711	19.3051	1.08749	0.0649211	9.13424	13.2027	0.894878	0.303779	1.61871	0.750514
Closed-Loop	Baseline	22.711	19.3051	1.08749	0.0649211	9.13424	13.2027	0.746823	0.352443	1.88643	0.697782
Closed-Loop	Baseline	22.711	19.3051	1.08749	0.0649211	9.13424	13.2027	0.977289	0.298539	2.2696	0.768923
Closed-Loop	Baseline	22.711	19.3051	1.08749	0.0649211	9.13424	13.2027	0.985824	0.338756	2.01131	0.666424
Closed-Loop	Baseline	22.711	19.3051	1.08749	0.0649211	9.13424	13.2027	1.01356	0.247724	2.19786	0.697261
Closed-Loop	Baseline	22.711	19.3051	1.08749	0.0649211	9.13424	13.2027	1.07285	0.298687	2.52995	0.653879
Closed-Loop	Baseline	22.711	19.3051	1.08749	0.0649211	9.13424	13.2027	1.06376	0.268774	2.31158	0.700368
Closed-Loop	Baseline	22.711	19.3051	1.08749	0.0649211	9.13424	13.2027	1.02588	0.337349	2.02795	0.626073
Closed-Loop	Baseline	22.711	19.3051	1.08749	0.0649211	9.13424	13.2027	1.11955	0.301575	1.8467	0.675618
Closed-Loop	Baseline	22.711	19.3051	1.08749	0.0649211	9.13424	13.2027	0.848103	0.334504	1.23394	0.628187
Closed-Loop	Baseline	22.711	19.3051	1.08749	0.0649211	9.13424	13.2027	1.05046	0.354386	1.94948	0.734696
Closed-Loop	Baseline	22.711	19.3051	1.08749	0.0649211	9.13424	13.2027	1.06265	0.334581	1.9022	0.735829
Closed-Loop	Baseline	22.711	19.3051	1.08749	0.0649211	9.13424	13.2027	0.876044	0.313656	2.11711	0.613487
Closed-Loop	Baseline	22.711	19.3051	1.08749	0.0649211	9.13424	13.2027	0.849713	0.250089	1.95383	0.766694
Closed-Loop	Baseline	22.711	19.3051	1.08749	0.0649211	9.13424	13.2027	0.925406	0.299861	1.90388	0.824871
Closed-Loop	Baseline	22.711	19.3051	1.08749	0.0649211	9.13424	13.2027	0.933846	0.273345	1.46618	0.7023
Closed-Loop	Baseline	22.711	19.3051	1.08749	0.0649211	9.13424	13.2027	1.07534	0.282797	1.71801	0.667944
Closed-Loop	Baseline	22.711	19.3051	1.08749	0.0649211	9.13424	13.2027	0.938546	0.281273	2.143	0.841217
Closed-Loop	Baseline	22.711	19.3051	1.08749	0.0649211	9.13424	13.2027	0.914365	0.251004	2.51477	0.634052
Closed-Loop	Baseline	22.711	19.3051	1.08749	0.0649211	9.13424	13.2027	0.938837	0.202133	1.97074	0.701005
Closed-Loop	Baseline	22.711	19.3051	1.08749	0.0649211	9.13424	13.2027	1.11186	0.266593	2.09834	0.708981
Closed-Loop	Baseline	22.711	19.3051	1.08749	0.0649211	9.13424	13.2027	1.0013	0.309669	2.28574	0.767257
Closed-Loop	Baseline	22.711	19.3051	1.08749	0.0649211	9.13424	13.2027	0.982075	0.232591	1.75673	0.717987
Closed-Loop	Baseline	22.711	19.3051	1.08749	0.0649211	9.13424	13.2027	0.988999	0.300784	2.11004	0.675068
Closed-Loop	Baseline	22.711	19.3051	1.08749	0.0649211	9.13424	13.2027	1.12921	0.395013	1.77785	0.652441
Closed-Loop	Baseline	22.711	19.3051	1.08749	0.0649211	9.13424	13.2027	0.925083	0.351153	2.25945	0.682909
Closed-Loop	Baseline	22.711	19.3051	1.08749	0.0649211	9.13424	13.2027	1.13155	0.382177	2.04542	0.649654
Closed-Loop	Baseline	22.711	19.3051	1.08749	0.0649211	9.13424	13.2027	1.02105	0.319556	2.08954	0.702391
Closed-Loop	Baseline	22.711	19.3051	1.08749	0.0649211	9.13424	13.2027	0.983958	0.358375	1.76522	0.67179
Closed-Loop	Baseline	22.711	19.3051	1.08749	0.0649211	9.13424	13.2027	1.25009	0.263802	2.21211	0.625298
Closed-Loop	Baseline	22.711	19.3051	1.08749	0.0649211	9.13424	13.2027	0.894436	0.267783	2.62541	0.762757
Closed-Loop	Baseline	22.711	19.3051	1.08749	0.0649211	9.13424	13.2027	0.964631	0.163043	1.69763	0.675116
Closed-Loop	Baseline	22.711	19.3051	1.08749	0.0649211	9.13424	13.2027	0.876757	0.359307	1.89807	0.636593
Closed-Loop	Baseline	22.711	19.3051	1.08749	0.0649211	9.13424	13.2027	1.09525	0.377016	2.06948	0.691587
Closed-Loop	Baseline	22.711	19.3051	1.08749	0.0649211	9.13424	13.2027	1.16892	0.272341	2.23592	0.703419
Closed-Loop	Baseline	22.711	19.3051	1.08749	0.0649211	9.13424	13.2027	1.16699	0.287302	1.83214	0.612677
Closed-Loop	Baseline	22.711	19.3051	1.08749	0.0649211	9.13424	13.2027	1.12239	0.262307	1.15009	0.716582
Closed-Loop	Baseline	22.711	19.3051	1.08749	0.0649211	9.13424	13.2027	0.980238	0.319133	2.40776	0.647642
Closed-Loop	Baseline	22.711	19.3051	1.08749	0.0649211	9.13424	13.2027	0.963476	0.356247	2.22815	0.785551
Closed-Loop	Baseline	22.711	19.3051	1.08749	0.0649211	9.13424	13.2027	0.832883	0.212861	1.47712	0.726198
Closed-Loop	Baseline	22.711	19.3051	1.08749	0.0649211	9.13424	13.2027	1.20359	0.320472	1.81773	0.680005
Closed-Loop	Baseline	22.711	19.3051	1.08749	0.0649211	9.13424	13.2027	1.0469	0.286166	2.47045	0.662742
Closed-Loop	Baseline	22.711	19.3051	1.08749	0.0649211	9.13424	13.2027	0.950804	0.30567	2.43434	0.694752
Closed-Loop	Baseline	22.711	19.3051	1.08749	0.0649211	9.13424	13.2027	1.13281	0.32295	2.28159	0.73064
Closed-Loop	Baseline	22.711	19.3051	1.08749	0.0649211	9.13424	13.2027	0.902724	0.29059	1.94717	0.698725
Closed-Loop	Baseline	22.711	19.3051	1.08749	0.0649211	9.13424	13.2027	1.04066	0.294821	2.0249	0.689142
Closed-Loop	Baseline	22.711	19.3051	1.08749	0.0649211	9.13424	13.2027	0.982737	0.289306	1.96072	0.702919
Closed-Loop	Baseline	22.711	19.3051	1.08749	0.0649211	9.13424	13.2027	1.06387	0.348516	2.33847	0.669807
Closed-Loop	Baseline	13.6297	9.03642	0.930517	0.0686292	3.99928	12.772	0.951638	0.296821	2.12563	0.656208
Closed-Loop	Baseline	13.6297	9.03642	0.930517	0.0686292	3.99928	12.772	1.08418	0.227454	2.06618	0.65971
Closed-Loop	Baseline	13.6297	9.03642	0.930517	0.0686292	3.99928	12.772	0.894878	0.303779	1.61871	0.750514
Closed-Loop	Baseline	13.6297	9.03642	0.930517	0.0686292	3.99928	12.772	0.746823	0.352443	1.88643	0.697782
Closed-Loop	Baseline	13.6297	9.03642	0.930517	0.0686292	3.99928	12.772	0.977289	0.298539	2.2696	0.768923
Closed-Loop	Baseline	13.6297	9.03642	0.930517	0.0686292	3.99928	12.772	0.985824	0.338756	2.01131	0.666424
Closed-Loop	Baseline	13.6297	9.03642	0.930517	0.0686292	3.99928	12.772	1.01356	0.247724	2.19786	0.697261
Closed-Loop	Baseline	13.6297	9.03642	0.930517	0.0686292	3.99928	12.772	1.07285	0.298687	2.52995	0.653879
Closed-Loop	Baseline	13.6297	9.03642	0.930517	0.0686292	3.99928	12.772	1.06376	0.268774	2.31158	0.700368
Closed-Loop	Baseline	13.6297	9.03642	0.930517	0.0686292	3.99928	12.772	1.02588	0.337349	2.02795	0.626073
Closed-Loop	Baseline	13.6297	9.03642	0.930517	0.0686292	3.99928	12.772	1.11955	0.301575	1.8467	0.675618
Closed-Loop	Baseline	13.6297	9.03642	0.930517	0.0686292	3.99928	12.772	0.848103	0.334504	1.23394	0.628187
Closed-Loop	Baseline	13.6297	9.03642	0.930517	0.0686292	3.99928	12.772	1.05046	0.354386	1.94948	0.734696
Closed-Loop	Baseline	13.6297	9.03642	0.930517	0.0686292	3.99928	12.772	1.06265	0.334581	1.9022	0.735829
Closed-Loop	Baseline	13.6297	9.03642	0.930517	0.0686292	3.99928	12.772	0.876044	0.313656	2.11711	0.613487
Closed-Loop	Baseline	13.6297	9.03642	0.930517	0.0686292	3.99928	12.772	0.849713	0.250089	1.95383	0.766694
Closed-Loop	Baseline	13.6297	9.03642	0.930517	0.0686292	3.99928	12.772	0.925406	0.299861	1.90388	0.824871
Closed-Loop	Baseline	13.6297	9.03642	0.930517	0.0686292	3.99928	12.772	0.933846	0.273345	1.46618	0.7023
Closed-Loop	Baseline	13.6297	9.03642	0.930517	0.0686292	3.99928	12.772	1.07534	0.282797	1.71801	0.667944
Closed-Loop	Baseline	13.6297	9.03642	0.930517	0.0686292	3.99928	12.772	0.938546	0.281273	2.143	0.841217
Closed-Loop	Baseline	13.6297	9.03642	0.930517	0.0686292	3.99928	12.772	0.914365	0.251004	2.51477	0.634052
Closed-Loop	Baseline	13.6297	9.03642	0.930517	0.0686292	3.99928	12.772	0.938837	0.202133	1.97074	0.701005
Closed-Loop	Baseline	13.6297	9.03642	0.930517	0.0686292	3.99928	12.772	1.11186	0.266593	2.09834	0.708981
Closed-Loop	Baseline	13.6297	9.03642	0.930517	0.0686292	3.99928	12.772	1.0013	0.309669	2.28574	0.767257
Closed-Loop	Baseline	13.6297	9.03642	0.930517	0.0686292	3.99928	12.772	0.982075	0.232591	1.75673	0.717987
Closed-Loop	Baseline	13.6297	9.03642	0.930517	0.0686292	3.99928	12.772	0.988999	0.300784	2.11004	0.675068
Closed-Loop	Baseline	13.6297	9.03642	0.930517	0.0686292	3.99928	12.772	1.12921	0.395013	1.77785	0.652441
Closed-Loop	Baseline	13.6297	9.03642	0.930517	0.0686292	3.99928	12.772	0.925083	0.351153	2.25945	0.682909
Closed-Loop	Baseline	13.6297	9.03642	0.930517	0.0686292	3.99928	12.772	1.13155	0.382177	2.04542	0.649654
Closed-Loop	Baseline	13.6297	9.03642	0.930517	0.0686292	3.99928	12.772	1.02105	0.319556	2.08954	0.702391
Closed-Loop	Baseline	13.6297	9.03642	0.930517	0.0686292	3.99928	12.772	0.983958	0.358375	1.76522	0.67179
Closed-Loop	Baseline	13.6297	9.03642	0.930517	0.0686292	3.99928	12.772	1.25009	0.263802	2.21211	0.625298
Closed-Loop	Baseline	13.6297	9.03642	0.930517	0.0686292	3.99928	12.772	0.894436	0.267783	2.62541	0.762757
Closed-Loop	Baseline	13.6297	9.03642	0.930517	0.0686292	3.99928	12.772	0.964631	0.163043	1.69763	0.675116
Closed-Loop	Baseline	13.6297	9.03642	0.930517	0.0686292	3.99928	12.772	0.876757	0.359307	1.89807	0.636593
Closed-Loop	Baseline	13.6297	9.03642	0.930517	0.0686292	3.99928	12.772	1.09525	0.377016	2.06948	0.691587
Closed-Loop	Baseline	13.6297	9.03642	0.930517	0.0686292	3.99928	12.772	1.16892	0.272341	2.23592	0.703419
Closed-Loop	Baseline	13.6297	9.03642	0.930517	0.0686292	3.99928	12.772	1.16699	0.287302	1.83214	0.612677
Closed-Loop	Baseline	13.6297	9.03642	0.930517	0.0686292	3.99928	12.772	1.12239	0.262307	1.15009	0.716582
Closed-Loop	Baseline	13.6297	9.03642	0.930517	0.0686292	3.99928	12.772	0.980238	0.319133	2.40776	0.647642
Closed-Loop	Baseline	13.6297	9.03642	0.930517	0.0686292	3.99928	12.772	0.963476	0.356247	2.22815	0.785551
Closed-Loop	Baseline	13.6297	9.03642	0.930517	0.0686292	3.99928	12.772	0.832883	0.212861	1.47712	0.726198
Closed-Loop	Baseline	13.6297	9.03642	0.930517	0.0686292	3.99928	12.772	1.20359	0.320472	1.81773	0.680005
Closed-Loop	Baseline	13.6297	9.03642	0.930517	0.0686292	3.99928	12.772	1.0469	0.286166	2.47045	0.662742
Closed-Loop	Baseline	13.6297	9.03642	0.930517	0.0686292	3.99928	12.772	0.950804	0.30567	2.43434	0.694752
Closed-Loop	Baseline	13.6297	9.03642	0.930517	0.0686292	3.99928	12.772	1.13281	0.32295	2.28159	0.73064
Closed-Loop	Baseline	13.6297	9.03642	0.930517	0.0686292	3.99928	12.772	0.902724	0.29059	1.94717	0.698725
Closed-Loop	Baseline	13.6297	9.03642	0.930517	0.0686292	3.99928	12.772	1.04066	0.294821	2.0249	0.689142
Closed-Loop	Baseline	13.6297	9.03642	0.930517	0.0686292	3.99928	12.772	0.982737	0.289306	1.96072	0.702919
Closed-Loop	Baseline	13.6297	9.03642	0.930517	0.0686292	3.99928	12.772	1.06387	0.348516	2.33847	0.669807
Closed-Loop	Baseline	14.7218	24.2029	0.768277	0.0982047	7.37245	13.3254	0.951638	0.296821	2.12563	0.656208
Closed-Loop	Baseline	14.7218	24.2029	0.768277	0.0982047	7.37245	13.3254	1.08418	0.227454	2.06618	0.65971
Closed-Loop	Baseline	14.7218	24.2029	0.768277	0.0982047	7.37245	13.3254	0.894878	0.303779	1.61871	0.750514
Closed-Loop	Baseline	14.7218	24.2029	0.768277	0.0982047	7.37245	13.3254	0.746823	0.352443	1.88643	0.697782
Closed-Loop	Baseline	14.7218	24.2029	0.768277	0.0982047	7.37245	13.3254	0.977289	0.298539	2.2696	0.768923
Closed-Loop	Baseline	14.7218	24.2029	0.768277	0.0982047	7.37245	13.3254	0.985824	0.338756	2.01131	0.666424
Closed-Loop	Baseline	14.7218	24.2029	0.768277	0.0982047	7.37245	13.3254	1.01356	0.247724	2.19786	0.697261
Closed-Loop	Baseline	14.7218	24.2029	0.768277	0.0982047	7.37245	13.3254	1.07285	0.298687	2.52995	0.653879
Closed-Loop	Baseline	14.7218	24.2029	0.768277	0.0982047	7.37245	13.3254	1.06376	0.268774	2.31158	0.700368
Closed-Loop	Baseline	14.7218	24.2029	0.768277	0.0982047	7.37245	13.3254	1.02588	0.337349	2.02795	0.626073
Closed-Loop	Baseline	14.7218	24.2029	0.768277	0.0982047	7.37245	13.3254	1.11955	0.301575	1.8467	0.675618
Closed-Loop	Baseline	14.7218	24.2029	0.768277	0.0982047	7.37245	13.3254	0.848103	0.334504	1.23394	0.628187
Closed-Loop	Baseline	14.7218	24.2029	0.768277	0.0982047	7.37245	13.3254	1.05046	0.354386	1.94948	0.734696
Closed-Loop	Baseline	14.7218	24.2029	0.768277	0.0982047	7.37245	13.3254	1.06265	0.334581	1.9022	0.735829
Closed-Loop	Baseline	14.7218	24.2029	0.768277	0.0982047	7.37245	13.3254	0.876044	0.313656	2.11711	0.613487
Closed-Loop	Baseline	14.7218	24.2029	0.768277	0.0982047	7.37245	13.3254	0.849713	0.250089	1.95383	0.766694
Closed-Loop	Baseline	14.7218	24.2029	0.768277	0.0982047	7.37245	13.3254	0.925406	0.299861	1.90388	0.824871
Closed-Loop	Baseline	14.7218	24.2029	0.768277	0.0982047	7.37245	13.3254	0.933846	0.273345	1.46618	0.7023
Closed-Loop	Baseline	14.7218	24.2029	0.768277	0.0982047	7.37245	13.3254	1.07534	0.282797	1.71801	0.667944
Closed-Loop	Baseline	14.7218	24.2029	0.768277	0.0982047	7.37245	13.3254	0.938546	0.281273	2.143	0.841217
Closed-Loop	Baseline	14.7218	24.2029	0.768277	0.0982047	7.37245	13.3254	0.914365	0.251004	2.51477	0.634052
Closed-Loop	Baseline	14.7218	24.2029	0.768277	0.0982047	7.37245	13.3254	0.938837	0.202133	1.97074	0.701005
Closed-Loop	Baseline	14.7218	24.2029	0.768277	0.0982047	7.37245	13.3254	1.11186	0.266593	2.09834	0.708981
Closed-Loop	Baseline	14.7218	24.2029	0.768277	0.0982047	7.37245	13.3254	1.0013	0.309669	2.28574	0.767257
Closed-Loop	Baseline	14.7218	24.2029	0.768277	0.0982047	7.37245	13.3254	0.982075	0.232591	1.75673	0.717987
Closed-Loop	Baseline	14.7218	24.2029	0.768277	0.0982047	7.37245	13.3254	0.988999	0.300784	2.11004	0.675068
Closed-Loop	Baseline	14.7218	24.2029	0.768277	0.0982047	7.37245	13.3254	1.12921	0.395013	1.77785	0.652441
Closed-Loop	Baseline	14.7218	24.2029	0.768277	0.0982047	7.37245	13.3254	0.925083	0.351153	2.25945	0.682909
Closed-Loop	Baseline	14.7218	24.2029	0.768277	0.0982047	7.37245	13.3254	1.13155	0.382177	2.04542	0.649654
Closed-Loop	Baseline	14.7218	24.2029	0.768277	0.0982047	7.37245	13.3254	1.02105	0.319556	2.08954	0.702391
Closed-Loop	Baseline	14.7218	24.2029	0.768277	0.0982047	7.37245	13.3254	0.983958	0.358375	1.76522	0.67179
Closed-Loop	Baseline	14.7218	24.2029	0.768277	0.0982047	7.37245	13.3254	1.25009	0.263802	2.21211	0.625298
Closed-Loop	Baseline	14.7218	24.2029	0.768277	0.0982047	7.37245	13.3254	0.894436	0.267783	2.62541	0.762757
Closed-Loop	Baseline	14.7218	24.2029	0.768277	0.0982047	7.37245	13.3254	0.964631	0.163043	1.69763	0.675116
Closed-Loop	Baseline	14.7218	24.2029	0.768277	0.0982047	7.37245	13.3254	0.876757	0.359307	1.89807	0.636593
Closed-Loop	Baseline	14.7218	24.2029	0.768277	0.0982047	7.37245	13.3254	1.09525	0.377016	2.06948	0.691587
Closed-Loop	Baseline	14.7218	24.2029	0.768277	0.0982047	7.37245	13.3254	1.16892	0.272341	2.23592	0.703419
Closed-Loop	Baseline	14.7218	24.2029	0.768277	0.0982047	7.37245	13.3254	1.16699	0.287302	1.83214	0.612677
Closed-Loop	Baseline	14.7218	24.2029	0.768277	0.0982047	7.37245	13.3254	1.12239	0.262307	1.15009	0.716582
Closed-Loop	Baseline	14.7218	24.2029	0.768277	0.0982047	7.37245	13.3254	0.980238	0.319133	2.40776	0.647642
Closed-Loop	Baseline	14.7218	24.2029	0.768277	0.0982047	7.37245	13.3254	0.963476	0.356247	2.22815	0.785551
Closed-Loop	Baseline	14.7218	24.2029	0.768277	0.0982047	7.37245	13.3254	0.832883	0.212861	1.47712	0.726198
Closed-Loop	Baseline	14.7218	24.2029	0.768277	0.0982047	7.37245	13.3254	1.20359	0.320472	1.81773	0.680005
Closed-Loop	Baseline	14.7218	24.2029	0.768277	0.0982047	7.37245	13.3254	1.0469	0.286166	2.47045	0.662742
Closed-Loop	Baseline	14.7218	24.2029	0.768277	0.0982047	7.37245	13.3254	0.950804	0.30567	2.43434	0.694752
Closed-Loop	Baseline	14.7218	24.2029	0.768277	0.0982047	7.37245	13.3254	1.13281	0.32295	2.28159	0.73064
Closed-Loop	Baseline	14.7218	24.2029	0.768277	0.0982047	7.37245	13.3254	0.902724	0.29059	1.94717	0.698725
Closed-Loop	Baseline	14.7218	24.2029	0.768277	0.0982047	7.37245	13.3254	1.04066	0.294821	2.0249	0.689142
Closed-Loop	Baseline	14.7218	24.2029	0.768277	0.0982047	7.37245	13.3254	0.982737	0.289306	1.96072	0.702919
Closed-Loop	Baseline	14.7218	24.2029	0.768277	0.0982047	7.37245	13.3254	1.06387	0.348516	2.33847	0.669807
Closed-Loop	Baseline	13.7173	16.8661	1.02561	0.0763701	5.91277	17.454	0.951638	0.296821	2.12563	0.656208
Closed-Loop	Baseline	13.7173	16.8661	1.02561	0.0763701	5.91277	17.454	1.08418	0.227454	2.06618	0.65971
Closed-Loop	Baseline	13.7173	16.8661	1.02561	0.0763701	5.91277	17.454	0.894878	0.303779	1.61871	0.750514
Closed-Loop	Baseline	13.7173	16.8661	1.02561	0.0763701	5.91277	17.454	0.746823	0.352443	1.88643	0.697782
Closed-Loop	Baseline	13.7173	16.8661	1.02561	0.0763701	5.91277	17.454	0.977289	0.298539	2.2696	0.768923
Closed-Loop	Baseline	13.7173	16.8661	1.02561	0.0763701	5.91277	17.454	0.985824	0.338756	2.01131	0.666424
Closed-Loop	Baseline	13.7173	16.8661	1.02561	0.0763701	5.91277	17.454	1.01356	0.247724	2.19786	0.697261
Closed-Loop	Baseline	13.7173	16.8661	1.02561	0.0763701	5.91277	17.454	1.07285	0.298687	2.52995	0.653879
Closed-Loop	Baseline	13.7173	16.8661	1.02561	0.0763701	5.91277	17.454	1.06376	0.268774	2.31158	0.700368
Closed-Loop	Baseline	13.7173	16.8661	1.02561	0.0763701	5.91277	17.454	1.02588	0.337349	2.02795	0.626073
Closed-Loop	Baseline	13.7173	16.8661	1.02561	0.0763701	5.91277	17.454	1.11955	0.301575	1.8467	0.675618
Closed-Loop	Baseline	13.7173	16.8661	1.02561	0.0763701	5.91277	17.454	0.848103	0.334504	1.23394	0.628187
Closed-Loop	Baseline	13.7173	16.8661	1.02561	0.0763701	5.91277	17.454	1.05046	0.354386	1.94948	0.734696
Closed-Loop	Baseline	13.7173	16.8661	1.02561	0.0763701	5.91277	17.454	1.06265	0.334581	1.9022	0.735829
Closed-Loop	Baseline	13.7173	16.8661	1.02561	0.0763701	5.91277	17.454	0.876044	0.313656	2.11711	0.613487
Closed-Loop	Baseline	13.7173	16.8661	1.02561	0.0763701	5.91277	17.454	0.849713	0.250089	1.95383	0.766694
Closed-Loop	Baseline	13.7173	16.8661	1.02561	0.0763701	5.91277	17.454	0.925406	0.299861	1.90388	0.824871
Closed-Loop	Baseline	13.7173	16.8661	1.02561	0.0763701	5.91277	17.454	0.933846	0.273345	1.46618	0.7023
Closed-Loop	Baseline	13.7173	16.8661	1.02561	0.0763701	5.91277	17.454	1.07534	0.282797	1.71801	0.667944
Closed-Loop	Baseline	13.7173	16.8661	1.02561	0.0763701	5.91277	17.454	0.938546	0.281273	2.143	0.841217
Closed-Loop	Baseline	13.7173	16.8661	1.02561	0.0763701	5.91277	17.454	0.914365	0.251004	2.51477	0.634052
Closed-Loop	Baseline	13.7173	16.8661	1.02561	0.0763701	5.91277	17.454	0.938837	0.202133	1.97074	0.701005
Closed-Loop	Baseline	13.7173	16.8661	1.02561	0.0763701	5.91277	17.454	1.11186	0.266593	2.09834	0.708981
Closed-Loop	Baseline	13.7173	16.8661	1.02561	0.0763701	5.91277	17.454	1.0013	0.309669	2.28574	0.767257
Closed-Loop	Baseline	13.7173	16.8661	1.02561	0.0763701	5.91277	17.454	0.982075	0.232591	1.75673	0.717987
Closed-Loop	Baseline	13.7173	16.8661	1.02561	0.0763701	5.91277	17.454	0.988999	0.300784	2.11004	0.675068
Closed-Loop	Baseline	13.7173	16.8661	1.02561	0.0763701	5.91277	17.454	1.12921	0.395013	1.77785	0.652441
Closed-Loop	Baseline	13.7173	16.8661	1.02561	0.0763701	5.91277	17.454	0.925083	0.351153	2.25945	0.682909
Closed-Loop	Baseline	13.7173	16.8661	1.02561	0.0763701	5.91277	17.454	1.13155	0.382177	2.04542	0.649654
Closed-Loop	Baseline	13.7173	16.8661	1.02561	0.0763701	5.91277	17.454	1.02105	0.319556	2.08954	0.702391
Closed-Loop	Baseline	13.7173	16.8661	1.02561	0.0763701	5.91277	17.454	0.983958	0.358375	1.76522	0.67179
Closed-Loop	Baseline	13.7173	16.8661	1.02561	0.0763701	5.91277	17.454	1.25009	0.263802	2.21211	0.625298
Closed-Loop	Baseline	13.7173	16.8661	1.02561	0.0763701	5.91277	17.454	0.894436	0.267783	2.62541	0.762757
Closed-Loop	Baseline	13.7173	16.8661	1.02561	0.0763701	5.91277	17.454	0.964631	0.163043	1.69763	0.675116
Closed-Loop	Baseline	13.7173	16.8661	1.02561	0.0763701	5.91277	17.454	0.876757	0.359307	1.89807	0.636593
Closed-Loop	Baseline	13.7173	16.8661	1.02561	0.0763701	5.91277	17.454	1.09525	0.377016	2.06948	0.691587
Closed-Loop	Baseline	13.7173	16.8661	1.02561	0.0763701	5.91277	17.454	1.16892	0.272341	2.23592	0.703419
Closed-Loop	Baseline	13.7173	16.8661	1.02561	0.0763701	5.91277	17.454	1.16699	0.287302	1.83214	0.612677
Closed-Loop	Baseline	13.7173	16.8661	1.02561	0.0763701	5.91277	17.454	1.12239	0.262307	1.15009	0.716582
Closed-Loop	Baseline	13.7173	16.8661	1.02561	0.0763701	5.91277	17.454	0.980238	0.319133	2.40776	0.647642
Closed-Loop	Baseline	13.7173	16.8661	1.02561	0.0763701	5.91277	17.454	0.963476	0.356247	2.22815	0.785551
Closed-Loop	Baseline	13.7173	16.8661	1.02561	0.0763701	5.91277	17.454	0.832883	0.212861	1.47712	0.726198
Closed-Loop	Baseline	13.7173	16.8661	1.02561	0.0763701	5.91277	17.454	1.20359	0.320472	1.81773	0.680005
Closed-Loop	Baseline	13.7173	16.8661	1.02561	0.0763701	5.91277	17.454	1.0469	0.286166	2.47045	0.662742
Closed-Loop	Baseline	13.7173	16.8661	1.02561	0.0763701	5.91277	17.454	0.950804	0.30567	2.43434	0.694752
Closed-Loop	Baseline	13.7173	16.8661	1.02561	0.0763701	5.91277	17.454	1.13281	0.32295	2.28159	0.73064
Closed-Loop	Baseline	13.7173	16.8661	1.02561	0.0763701	5.91277	17.454	0.902724	0.29059	1.94717	0.698725
Closed-Loop	Baseline	13.7173	16.8661	1.02561	0.0763701	5.91277	17.454	1.04066	0.294821	2.0249	0.689142
Closed-Loop	Baseline	13.7173	16.8661	1.02561	0.0763701	5.91277	17.454	0.982737	0.289306	1.96072	0.702919
Closed-Loop	Baseline	13.7173	16.8661	1.02561	0.0763701	5.91277	17.454	1.06387	0.348516	2.33847	0.669807
Closed-Loop	Baseline	20.714	15.7692	1.08502	0.0859151	6.33065	15.6302	0.951638	0.296821	2.12563	0.656208
Closed-Loop	Baseline	20.714	15.7692	1.08502	0.0859151	6.33065	15.6302	1.08418	0.227454	2.06618	0.65971
Closed-Loop	Baseline	20.714	15.7692	1.08502	0.0859151	6.33065	15.6302	0.894878	0.303779	1.61871	0.750514
Closed-Loop	Baseline	20.714	15.7692	1.08502	0.0859151	6.33065	15.6302	0.746823	0.352443	1.88643	0.697782
Closed-Loop	Baseline	20.714	15.7692	1.08502	0.0859151	6.33065	15.6302	0.977289	0.298539	2.2696	0.768923
Closed-Loop	Baseline	20.714	15.7692	1.08502	0.0859151	6.33065	15.6302	0.985824	0.338756	2.01131	0.666424
Closed-Loop	Baseline	20.714	15.7692	1.08502	0.0859151	6.33065	15.6302	1.01356	0.247724	2.19786	0.697261
Closed-Loop	Baseline	20.714	15.7692	1.08502	0.0859151	6.33065	15.6302	1.07285	0.298687	2.52995	0.653879
Closed-Loop	Baseline	20.714	15.7692	1.08502	0.0859151	6.33065	15.6302	1.06376	0.268774	2.31158	0.700368
Closed-Loop	Baseline	20.714	15.7692	1.08502	0.0859151	6.33065	15.6302	1.02588	0.337349	2.02795	0.626073
Closed-Loop	Baseline	20.714	15.7692	1.08502	0.0859151	6.33065	15.6302	1.11955	0.301575	1.8467	0.675618
Closed-Loop	Baseline	20.714	15.7692	1.08502	0.0859151	6.33065	15.6302	0.848103	0.334504	1.23394	0.628187
Closed-Loop	Baseline	20.714	15.7692	1.08502	0.0859151	6.33065	15.6302	1.05046	0.354386	1.94948	0.734696
Closed-Loop	Baseline	20.714	15.7692	1.08502	0.0859151	6.33065	15.6302	1.06265	0.334581	1.9022	0.735829
Closed-Loop	Baseline	20.714	15.7692	1.08502	0.0859151	6.33065	15.6302	0.876044	0.313656	2.11711	0.613487
Closed-Loop	Baseline	20.714	15.7692	1.08502	0.0859151	6.33065	15.6302	0.849713	0.250089	1.95383	0.766694
Closed-Loop	Baseline	20.714	15.7692	1.08502	0.0859151	6.33065	15.6302	0.925406	0.299861	1.90388	0.824871
Closed-Loop	Baseline	20.714	15.7692	1.08502	0.0859151	6.33065	15.6302	0.933846	0.273345	1.46618	0.7023
Closed-Loop	Baseline	20.714	15.7692	1.08502	0.0859151	6.33065	15.6302	1.07534	0.282797	1.71801	0.667944
Closed-Loop	Baseline	20.714	15.7692	1.08502	0.0859151	6.33065	15.6302	0.938546	0.281273	2.143	0.841217
Closed-Loop	Baseline	20.714	15.7692	1.08502	0.0859151	6.33065	15.6302	0.914365	0.251004	2.51477	0.634052
Closed-Loop	Baseline	20.714	15.7692	1.08502	0.0859151	6.33065	15.6302	0.938837	0.202133	1.97074	0.701005
Closed-Loop	Baseline	20.714	15.7692	1.08502	0.0859151	6.33065	15.6302	1.11186	0.266593	2.09834	0.708981
Closed-Loop	Baseline	20.714	15.7692	1.08502	0.0859151	6.33065	15.6302	1.0013	0.309669	2.28574	0.767257
Closed-Loop	Baseline	20.714	15.7692	1.08502	0.0859151	6.33065	15.6302	0.982075	0.232591	1.75673	0.717987
Closed-Loop	Baseline	20.714	15.7692	1.08502	0.0859151	6.33065	15.6302	0.988999	0.300784	2.11004	0.675068
Closed-Loop	Baseline	20.714	15.7692	1.08502	0.0859151	6.33065	15.6302	1.12921	0.395013	1.77785	0.652441
Closed-Loop	Baseline	20.714	15.7692	1.08502	0.0859151	6.33065	15.6302	0.925083	0.351153	2.25945	0.682909
Closed-Loop	Baseline	20.714	15.7692	1.08502	0.0859151	6.33065	15.6302	1.13155	0.382177	2.04542	0.649654
Closed-Loop	Baseline	20.714	15.7692	1.08502	0.0859151	6.33065	15.6302	1.02105	0.319556	2.08954	0.702391
Closed-Loop	Baseline	20.714	15.7692	1.08502	0.0859151	6.33065	15.6302	0.983958	0.358375	1.76522	0.67179
Closed-Loop	Baseline	20.714	15.7692	1.08502	0.0859151	6.33065	15.6302	1.25009	0.263802	2.21211	0.625298
Closed-Loop	Baseline	20.714	15.7692	1.08502	0.0859151	6.33065	15.6302	0.894436	0.267783	2.62541	0.762757
Closed-Loop	Baseline	20.714	15.7692	1.08502	0.0859151	6.33065	15.6302	0.964631	0.163043	1.69763	0.675116
Closed-Loop	Baseline	20.714	15.7692	1.08502	0.0859151	6.33065	15.6302	0.876757	0.359307	1.89807	0.636593
Closed-Loop	Baseline	20.714	15.7692	1.08502	0.0859151	6.33065	15.6302	1.09525	0.377016	2.06948	0.691587
Closed-Loop	Baseline	20.714	15.7692	1.08502	0.0859151	6.33065	15.6302	1.16892	0.272341	2.23592	0.703419
Closed-Loop	Baseline	20.714	15.7692	1.08502	0.0859151	6.33065	15.6302	1.16699	0.287302	1.83214	0.612677
Closed-Loop	Baseline	20.714	15.7692	1.08502	0.0859151	6.33065	15.6302	1.12239	0.262307	1.15009	0.716582
Closed-Loop	Baseline	20.714	15.7692	1.08502	0.0859151	6.33065	15.6302	0.980238	0.319133	2.40776	0.647642
Closed-Loop	Baseline	20.714	15.7692	1.08502	0.0859151	6.33065	15.6302	0.963476	0.356247	2.22815	0.785551
Closed-Loop	Baseline	20.714	15.7692	1.08502	0.0859151	6.33065	15.6302	0.832883	0.212861	1.47712	0.726198
Closed-Loop	Baseline	20.714	15.7692	1.08502	0.0859151	6.33065	15.6302	1.20359	0.320472	1.81773	0.680005
Closed-Loop	Baseline	20.714	15.7692	1.08502	0.0859151	6.33065	15.6302	1.0469	0.286166	2.47045	0.662742
Closed-Loop	Baseline	20.714	15.7692	1.08502	0.0859151	6.33065	15.6302	0.950804	0.30567	2.43434	0.694752
Closed-Loop	Baseline	20.714	15.7692	1.08502	0.0859151	6.33065	15.6302	1.13281	0.32295	2.28159	0.73064
Closed-Loop	Baseline	20.714	15.7692	1.08502	0.0859151	6.33065	15.6302	0.902724	0.29059	1.94717	0.698725
Closed-Loop	Baseline	20.714	15.7692	1.08502	0.0859151	6.33065	15.6302	1.04066	0.294821	2.0249	0.689142
Closed-Loop	Baseline	20.714	15.7692	1.08502	0.0859151	6.33065	15.6302	0.982737	0.289306	1.96072	0.702919
Closed-Loop	Baseline	20.714	15.7692	1.08502	0.0859151	6.33065	15.6302	1.06387	0.348516	2.33847	0.669807
Closed-Loop	Baseline	27.4122	15.0537	0.642833	0.0918711	5.59322	11.2593	0.951638	0.296821	2.12563	0.656208
Closed-Loop	Baseline	27.4122	15.0537	0.642833	0.0918711	5.59322	11.2593	1.08418	0.227454	2.06618	0.65971
Closed-Loop	Baseline	27.4122	15.0537	0.642833	0.0918711	5.59322	11.2593	0.894878	0.303779	1.61871	0.750514
Closed-Loop	Baseline	27.4122	15.0537	0.642833	0.0918711	5.59322	11.2593	0.746823	0.352443	1.88643	0.697782
Closed-Loop	Baseline	27.4122	15.0537	0.642833	0.0918711	5.59322	11.2593	0.977289	0.298539	2.2696	0.768923
Closed-Loop	Baseline	27.4122	15.0537	0.642833	0.0918711	5.59322	11.2593	0.985824	0.338756	2.01131	0.666424
Closed-Loop	Baseline	27.4122	15.0537	0.642833	0.0918711	5.59322	11.2593	1.01356	0.247724	2.19786	0.697261
Closed-Loop	Baseline	27.4122	15.0537	0.642833	0.0918711	5.59322	11.2593	1.07285	0.298687	2.52995	0.653879
Closed-Loop	Baseline	27.4122	15.0537	0.642833	0.0918711	5.59322	11.2593	1.06376	0.268774	2.31158	0.700368
Closed-Loop	Baseline	27.4122	15.0537	0.642833	0.0918711	5.59322	11.2593	1.02588	0.337349	2.02795	0.626073
Closed-Loop	Baseline	27.4122	15.0537	0.642833	0.0918711	5.59322	11.2593	1.11955	0.301575	1.8467	0.675618
Closed-Loop	Baseline	27.4122	15.0537	0.642833	0.0918711	5.59322	11.2593	0.848103	0.334504	1.23394	0.628187
Closed-Loop	Baseline	27.4122	15.0537	0.642833	0.0918711	5.59322	11.2593	1.05046	0.354386	1.94948	0.734696
Closed-Loop	Baseline	27.4122	15.0537	0.642833	0.0918711	5.59322	11.2593	1.06265	0.334581	1.9022	0.735829
Closed-Loop	Baseline	27.4122	15.0537	0.642833	0.0918711	5.59322	11.2593	0.876044	0.313656	2.11711	0.613487
Closed-Loop	Baseline	27.4122	15.0537	0.642833	0.0918711	5.59322	11.2593	0.849713	0.250089	1.95383	0.766694
Closed-Loop	Baseline	27.4122	15.0537	0.642833	0.0918711	5.59322	11.2593	0.925406	0.299861	1.90388	0.824871
Closed-Loop	Baseline	27.4122	15.0537	0.642833	0.0918711	5.59322	11.2593	0.933846	0.273345	1.46618	0.7023
Closed-Loop	Baseline	27.4122	15.0537	0.642833	0.0918711	5.59322	11.2593	1.07534	0.282797	1.71801	0.667944
Closed-Loop	Baseline	27.4122	15.0537	0.642833	0.0918711	5.59322	11.2593	0.938546	0.281273	2.143	0.841217
Closed-Loop	Baseline	27.4122	15.0537	0.642833	0.0918711	5.59322	11.2593	0.914365	0.251004	2.51477	0.634052
Closed-Loop	Baseline	27.4122	15.0537	0.642833	0.0918711	5.59322	11.2593	0.938837	0.202133	1.97074	0.701005
Closed-Loop	Baseline	27.4122	15.0537	0.642833	0.0918711	5.59322	11.2593	1.11186	0.266593	2.09834	0.708981
Closed-Loop	Baseline	27.4122	15.0537	0.642833	0.0918711	5.59322	11.2593	1.0013	0.309669	2.28574	0.767257
Closed-Loop	Baseline	27.4122	15.0537	0.642833	0.0918711	5.59322	11.2593	0.982075	0.232591	1.75673	0.717987
Closed-Loop	Baseline	27.4122	15.0537	0.642833	0.0918711	5.59322	11.2593	0.988999	0.300784	2.11004	0.675068
Closed-Loop	Baseline	27.4122	15.0537	0.642833	0.0918711	5.59322	11.2593	1.12921	0.395013	1.77785	0.652441
Closed-Loop	Baseline	27.4122	15.0537	0.642833	0.0918711	5.59322	11.2593	0.925083	0.351153	2.25945	0.682909
Closed-Loop	Baseline	27.4122	15.0537	0.642833	0.0918711	5.59322	11.2593	1.13155	0.382177	2.04542	0.649654
Closed-Loop	Baseline	27.4122	15.0537	0.642833	0.0918711	5.59322	11.2593	1.02105	0.319556	2.08954	0.702391
Closed-Loop	Baseline	27.4122	15.0537	0.642833	0.0918711	5.59322	11.2593	0.983958	0.358375	1.76522	0.67179
Closed-Loop	Baseline	27.4122	15.0537	0.642833	0.0918711	5.59322	11.2593	1.25009	0.263802	2.21211	0.625298
Closed-Loop	Baseline	27.4122	15.0537	0.642833	0.0918711	5.59322	11.2593	0.894436	0.267783	2.62541	0.762757
Closed-Loop	Baseline	27.4122	15.0537	0.642833	0.0918711	5.59322	11.2593	0.964631	0.163043	1.69763	0.675116
Closed-Loop	Baseline	27.4122	15.0537	0.642833	0.0918711	5.59322	11.2593	0.876757	0.359307	1.89807	0.636593
Closed-Loop	Baseline	27.4122	15.0537	0.642833	0.0918711	5.59322	11.2593	1.09525	0.377016	2.06948	0.691587
Closed-Loop	Baseline	27.4122	15.0537	0.642833	0.0918711	5.59322	11.2593	1.16892	0.272341	2.23592	0.703419
Closed-Loop	Baseline	27.4122	15.0537	0.642833	0.0918711	5.59322	11.2593	1.16699	0.287302	1.83214	0.612677
Closed-Loop	Baseline	27.4122	15.0537	0.642833	0.0918711	5.59322	11.2593	1.12239	0.262307	1.15009	0.716582
Closed-Loop	Baseline	27.4122	15.0537	0.642833	0.0918711	5.59322	11.2593	0.980238	0.319133	2.40776	0.647642
Closed-Loop	Baseline	27.4122	15.0537	0.642833	0.0918711	5.59322	11.2593	0.963476	0.356247	2.22815	0.785551
Closed-Loop	Baseline	27.4122	15.0537	0.642833	0.0918711	5.59322	11.2593	0.832883	0.212861	1.47712	0.726198
Closed-Loop	Baseline	27.4122	15.0537	0.642833	0.0918711	5.59322	11.2593	1.20359	0.320472	1.81773	0.680005
Closed-Loop	Baseline	27.4122	15.0537	0.642833	0.0918711	5.59322	11.2593	1.0469	0.286166	2.47045	0.662742
Closed-Loop	Baseline	27.4122	15.0537	0.642833	0.0918711	5.59322	11.2593	0.950804	0.30567	2.43434	0.694752
Closed-Loop	Baseline	27.4122	15.0537	0.642833	0.0918711	5.59322	11.2593	1.13281	0.32295	2.28159	0.73064
Closed-Loop	Baseline	27.4122	15.0537	0.642833	0.0918711	5.59322	11.2593	0.902724	0.29059	1.94717	0.698725
Closed-Loop	Baseline	27.4122	15.0537	0.642833	0.0918711	5.59322	11.2593	1.04066	0.294821	2.0249	0.689142
Closed-Loop	Baseline	27.4122	15.0537	0.642833	0.0918711	5.59322	11.2593	0.982737	0.289306	1.96072	0.702919
Closed-Loop	Baseline	27.4122	15.0537	0.642833	0.0918711	5.59322	11.2593	1.06387	0.348516	2.33847	0.669807
Closed-Loop	Baseline	31.761	16.0588	0.875352	0.0704892	6.52478	14.9876	0.951638	0.296821	2.12563	0.656208
Closed-Loop	Baseline	31.761	16.0588	0.875352	0.0704892	6.52478	14.9876	1.08418	0.227454	2.06618	0.65971
Closed-Loop	Baseline	31.761	16.0588	0.875352	0.0704892	6.52478	14.9876	0.894878	0.303779	1.61871	0.750514
Closed-Loop	Baseline	31.761	16.0588	0.875352	0.0704892	6.52478	14.9876	0.746823	0.352443	1.88643	0.697782
Closed-Loop	Baseline	31.761	16.0588	0.875352	0.0704892	6.52478	14.9876	0.977289	0.298539	2.2696	0.768923
Closed-Loop	Baseline	31.761	16.0588	0.875352	0.0704892	6.52478	14.9876	0.985824	0.338756	2.01131	0.666424
Closed-Loop	Baseline	31.761	16.0588	0.875352	0.0704892	6.52478	14.9876	1.01356	0.247724	2.19786	0.697261
Closed-Loop	Baseline	31.761	16.0588	0.875352	0.0704892	6.52478	14.9876	1.07285	0.298687	2.52995	0.653879
Closed-Loop	Baseline	31.761	16.0588	0.875352	0.0704892	6.52478	14.9876	1.06376	0.268774	2.31158	0.700368
Closed-Loop	Baseline	31.761	16.0588	0.875352	0.0704892	6.52478	14.9876	1.02588	0.337349	2.02795	0.626073
Closed-Loop	Baseline	31.761	16.0588	0.875352	0.0704892	6.52478	14.9876	1.11955	0.301575	1.8467	0.675618
Closed-Loop	Baseline	31.761	16.0588	0.875352	0.0704892	6.52478	14.9876	0.848103	0.334504	1.23394	0.628187
Closed-Loop	Baseline	31.761	16.0588	0.875352	0.0704892	6.52478	14.9876	1.05046	0.354386	1.94948	0.734696
Closed-Loop	Baseline	31.761	16.0588	0.875352	0.0704892	6.52478	14.9876	1.06265	0.334581	1.9022	0.735829
Closed-Loop	Baseline	31.761	16.0588	0.875352	0.0704892	6.52478	14.9876	0.876044	0.313656	2.11711	0.613487
Closed-Loop	Baseline	31.761	16.0588	0.875352	0.0704892	6.52478	14.9876	0.849713	0.250089	1.95383	0.766694
Closed-Loop	Baseline	31.761	16.0588	0.875352	0.0704892	6.52478	14.9876	0.925406	0.299861	1.90388	0.824871
Closed-Loop	Baseline	31.761	16.0588	0.875352	0.0704892	6.52478	14.9876	0.933846	0.273345	1.46618	0.7023
Closed-Loop	Baseline	31.761	16.0588	0.875352	0.0704892	6.52478	14.9876	1.07534	0.282797	1.71801	0.667944
Closed-Loop	Baseline	31.761	16.0588	0.875352	0.0704892	6.52478	14.9876	0.938546	0.281273	2.143	0.841217
Closed-Loop	Baseline	31.761	16.0588	0.875352	0.0704892	6.52478	14.9876	0.914365	0.251004	2.51477	0.634052
Closed-Loop	Baseline	31.761	16.0588	0.875352	0.0704892	6.52478	14.9876	0.938837	0.202133	1.97074	0.701005
Closed-Loop	Baseline	31.761	16.0588	0.875352	0.0704892	6.52478	14.9876	1.11186	0.266593	2.09834	0.708981
Closed-Loop	Baseline	31.761	16.0588	0.875352	0.0704892	6.52478	14.9876	1.0013	0.309669	2.28574	0.767257
Closed-Loop	Baseline	31.761	16.0588	0.875352	0.0704892	6.52478	14.9876	0.982075	0.232591	1.75673	0.717987
Closed-Loop	Baseline	31.761	16.0588	0.875352	0.0704892	6.52478	14.9876	0.988999	0.300784	2.11004	0.675068
Closed-Loop	Baseline	31.761	16.0588	0.875352	0.0704892	6.52478	14.9876	1.12921	0.395013	1.77785	0.652441
Closed-Loop	Baseline	31.761	16.0588	0.875352	0.0704892	6.52478	14.9876	0.925083	0.351153	2.25945	0.682909
Closed-Loop	Baseline	31.761	16.0588	0.875352	0.0704892	6.52478	14.9876	1.13155	0.382177	2.04542	0.649654
Closed-Loop	Baseline	31.761	16.0588	0.875352	0.0704892	6.52478	14.9876	1.02105	0.319556	2.08954	0.702391
Closed-Loop	Baseline	31.761	16.0588	0.875352	0.0704892	6.52478	14.9876	0.983958	0.358375	1.76522	0.67179
Closed-Loop	Baseline	31.761	16.0588	0.875352	0.0704892	6.52478	14.9876	1.25009	0.263802	2.21211	0.625298
Closed-Loop	Baseline	31.761	16.0588	0.875352	0.0704892	6.52478	14.9876	0.894436	0.267783	2.62541	0.762757
Closed-Loop	Baseline	31.761	16.0588	0.875352	0.0704892	6.52478	14.9876	0.964631	0.163043	1.69763	0.675116
Closed-Loop	Baseline	31.761	16.0588	0.875352	0.0704892	6.52478	14.9876	0.876757	0.359307	1.89807	0.636593
Closed-Loop	Baseline	31.761	16.0588	0.875352	0.0704892	6.52478	14.9876	1.09525	0.377016	2.06948	0.691587
Closed-Loop	Baseline	31.761	16.0588	0.875352	0.0704892	6.52478	14.9876	1.16892	0.272341	2.23592	0.703419
Closed-Loop	Baseline	31.761	16.0588	0.875352	0.0704892	6.52478	14.9876	1.16699	0.287302	1.83214	0.612677
Closed-Loop	Baseline	31.761	16.0588	0.875352	0.0704892	6.52478	14.9876	1.12239	0.262307	1.15009	0.716582
Closed-Loop	Baseline	31.761	16.0588	0.875352	0.0704892	6.52478	14.9876	0.980238	0.319133	2.40776	0.647642
Closed-Loop	Baseline	31.761	16.0588	0.875352	0.0704892	6.52478	14.9876	0.963476	0.356247	2.22815	0.785551
Closed-Loop	Baseline	31.761	16.0588	0.875352	0.0704892	6.52478	14.9876	0.832883	0.212861	1.47712	0.726198
Closed-Loop	Baseline	31.761	16.0588	0.875352	0.0704892	6.52478	14.9876	1.20359	0.320472	1.81773	0.680005
Closed-Loop	Baseline	31.761	16.0588	0.875352	0.0704892	6.52478	14.9876	1.0469	0.286166	2.47045	0.662742
Closed-Loop	Baseline	31.761	16.0588	0.875352	0.0704892	6.52478	14.9876	0.950804	0.30567	2.43434	0.694752
Closed-Loop	Baseline	31.761	16.0588	0.875352	0.0704892	6.52478	14.9876	1.13281	0.32295	2.28159	0.73064
Closed-Loop	Baseline	31.761	16.0588	0.875352	0.0704892	6.52478	14.9876	0.902724	0.29059	1.94717	0.698725
Closed-Loop	Baseline	31.761	16.0588	0.875352	0.0704892	6.52478	14.9876	1.04066	0.294821	2.0249	0.689142
Closed-Loop	Baseline	31.761	16.0588	0.875352	0.0704892	6.52478	14.9876	0.982737	0.289306	1.96072	0.702919
Closed-Loop	Baseline	31.761	16.0588	0.875352	0.0704892	6.52478	14.9876	1.06387	0.348516	2.33847	0.669807
Closed-Loop	Baseline	24.0726	17.1813	0.796132	0.0801975	5.50011	15.4867	0.951638	0.296821	2.12563	0.656208
Closed-Loop	Baseline	24.0726	17.1813	0.796132	0.0801975	5.50011	15.4867	1.08418	0.227454	2.06618	0.65971
Closed-Loop	Baseline	24.0726	17.1813	0.796132	0.0801975	5.50011	15.4867	0.894878	0.303779	1.61871	0.750514
Closed-Loop	Baseline	24.0726	17.1813	0.796132	0.0801975	5.50011	15.4867	0.746823	0.352443	1.88643	0.697782
Closed-Loop	Baseline	24.0726	17.1813	0.796132	0.0801975	5.50011	15.4867	0.977289	0.298539	2.2696	0.768923
Closed-Loop	Baseline	24.0726	17.1813	0.796132	0.0801975	5.50011	15.4867	0.985824	0.338756	2.01131	0.666424
Closed-Loop	Baseline	24.0726	17.1813	0.796132	0.0801975	5.50011	15.4867	1.01356	0.247724	2.19786	0.697261
Closed-Loop	Baseline	24.0726	17.1813	0.796132	0.0801975	5.50011	15.4867	1.07285	0.298687	2.52995	0.653879
Closed-Loop	Baseline	24.0726	17.1813	0.796132	0.0801975	5.50011	15.4867	1.06376	0.268774	2.31158	0.700368
Closed-Loop	Baseline	24.0726	17.1813	0.796132	0.0801975	5.50011	15.4867	1.02588	0.337349	2.02795	0.626073
Closed-Loop	Baseline	24.0726	17.1813	0.796132	0.0801975	5.50011	15.4867	1.11955	0.301575	1.8467	0.675618
Closed-Loop	Baseline	24.0726	17.1813	0.796132	0.0801975	5.50011	15.4867	0.848103	0.334504	1.23394	0.628187
Closed-Loop	Baseline	24.0726	17.1813	0.796132	0.0801975	5.50011	15.4867	1.05046	0.354386	1.94948	0.734696
Closed-Loop	Baseline	24.0726	17.1813	0.796132	0.0801975	5.50011	15.4867	1.06265	0.334581	1.9022	0.735829
Closed-Loop	Baseline	24.0726	17.1813	0.796132	0.0801975	5.50011	15.4867	0.876044	0.313656	2.11711	0.613487
Closed-Loop	Baseline	24.0726	17.1813	0.796132	0.0801975	5.50011	15.4867	0.849713	0.250089	1.95383	0.766694
Closed-Loop	Baseline	24.0726	17.1813	0.796132	0.0801975	5.50011	15.4867	0.925406	0.299861	1.90388	0.824871
Closed-Loop	Baseline	24.0726	17.1813	0.796132	0.0801975	5.50011	15.4867	0.933846	0.273345	1.46618	0.7023
Closed-Loop	Baseline	24.0726	17.1813	0.796132	0.0801975	5.50011	15.4867	1.07534	0.282797	1.71801	0.667944
Closed-Loop	Baseline	24.0726	17.1813	0.796132	0.0801975	5.50011	15.4867	0.938546	0.281273	2.143	0.841217
Closed-Loop	Baseline	24.0726	17.1813	0.796132	0.0801975	5.50011	15.4867	0.914365	0.251004	2.51477	0.634052
Closed-Loop	Baseline	24.0726	17.1813	0.796132	0.0801975	5.50011	15.4867	0.938837	0.202133	1.97074	0.701005
Closed-Loop	Baseline	24.0726	17.1813	0.796132	0.0801975	5.50011	15.4867	1.11186	0.266593	2.09834	0.708981
Closed-Loop	Baseline	24.0726	17.1813	0.796132	0.0801975	5.50011	15.4867	1.0013	0.309669	2.28574	0.767257
Closed-Loop	Baseline	24.0726	17.1813	0.796132	0.0801975	5.50011	15.4867	0.982075	0.232591	1.75673	0.717987
Closed-Loop	Baseline	24.0726	17.1813	0.796132	0.0801975	5.50011	15.4867	0.988999	0.300784	2.11004	0.675068
Closed-Loop	Baseline	24.0726	17.1813	0.796132	0.0801975	5.50011	15.4867	1.12921	0.395013	1.77785	0.652441
Closed-Loop	Baseline	24.0726	17.1813	0.796132	0.0801975	5.50011	15.4867	0.925083	0.351153	2.25945	0.682909
Closed-Loop	Baseline	24.0726	17.1813	0.796132	0.0801975	5.50011	15.4867	1.13155	0.382177	2.04542	0.649654
Closed-Loop	Baseline	24.0726	17.1813	0.796132	0.0801975	5.50011	15.4867	1.02105	0.319556	2.08954	0.702391
Closed-Loop	Baseline	24.0726	17.1813	0.796132	0.0801975	5.50011	15.4867	0.983958	0.358375	1.76522	0.67179
Closed-Loop	Baseline	24.0726	17.1813	0.796132	0.0801975	5.50011	15.4867	1.25009	0.263802	2.21211	0.625298
Closed-Loop	Baseline	24.0726	17.1813	0.796132	0.0801975	5.50011	15.4867	0.894436	0.267783	2.62541	0.762757
Closed-Loop	Baseline	24.0726	17.1813	0.796132	0.0801975	5.50011	15.4867	0.964631	0.163043	1.69763	0.675116
Closed-Loop	Baseline	24.0726	17.1813	0.796132	0.0801975	5.50011	15.4867	0.876757	0.359307	1.89807	0.636593
Closed-Loop	Baseline	24.0726	17.1813	0.796132	0.0801975	5.50011	15.4867	1.09525	0.377016	2.06948	0.691587
Closed-Loop	Baseline	24.0726	17.1813	0.796132	0.0801975	5.50011	15.4867	1.16892	0.272341	2.23592	0.703419
Closed-Loop	Baseline	24.0726	17.1813	0.796132	0.0801975	5.50011	15.4867	1.16699	0.287302	1.83214	0.612677
Closed-Loop	Baseline	24.0726	17.1813	0.796132	0.0801975	5.50011	15.4867	1.12239	0.262307	1.15009	0.716582
Closed-Loop	Baseline	24.0726	17.1813	0.796132	0.0801975	5.50011	15.4867	0.980238	0.319133	2.40776	0.647642
Closed-Loop	Baseline	24.0726	17.1813	0.796132	0.0801975	5.50011	15.4867	0.963476	0.356247	2.22815	0.785551
Closed-Loop	Baseline	24.0726	17.1813	0.796132	0.0801975	5.50011	15.4867	0.832883	0.212861	1.47712	0.726198
Closed-Loop	Baseline	24.0726	17.1813	0.796132	0.0801975	5.50011	15.4867	1.20359	0.320472	1.81773	0.680005
Closed-Loop	Baseline	24.0726	17.1813	0.796132	0.0801975	5.50011	15.4867	1.0469	0.286166	2.47045	0.662742
Closed-Loop	Baseline	24.0726	17.1813	0.796132	0.0801975	5.50011	15.4867	0.950804	0.30567	2.43434	0.694752
Closed-Loop	Baseline	24.0726	17.1813	0.796132	0.0801975	5.50011	15.4867	1.13281	0.32295	2.28159	0.73064
Closed-Loop	Baseline	24.0726	17.1813	0.796132	0.0801975	5.50011	15.4867	0.902724	0.29059	1.94717	0.698725
Closed-Loop	Baseline	24.0726	17.1813	0.796132	0.0801975	5.50011	15.4867	1.04066	0.294821	2.0249	0.689142
Closed-Loop	Baseline	24.0726	17.1813	0.796132	0.0801975	5.50011	15.4867	0.982737	0.289306	1.96072	0.702919
Closed-Loop	Baseline	24.0726	17.1813	0.796132	0.0801975	5.50011	15.4867	1.06387	0.348516	2.33847	0.669807
Closed-Loop	Baseline	22.0521	16.4001	0.783902	0.083499	4.03797	16.2315	0.951638	0.296821	2.12563	0.656208
Closed-Loop	Baseline	22.0521	16.4001	0.783902	0.083499	4.03797	16.2315	1.08418	0.227454	2.06618	0.65971
Closed-Loop	Baseline	22.0521	16.4001	0.783902	0.083499	4.03797	16.2315	0.894878	0.303779	1.61871	0.750514
Closed-Loop	Baseline	22.0521	16.4001	0.783902	0.083499	4.03797	16.2315	0.746823	0.352443	1.88643	0.697782
Closed-Loop	Baseline	22.0521	16.4001	0.783902	0.083499	4.03797	16.2315	0.977289	0.298539	2.2696	0.768923
Closed-Loop	Baseline	22.0521	16.4001	0.783902	0.083499	4.03797	16.2315	0.985824	0.338756	2.01131	0.666424
Closed-Loop	Baseline	22.0521	16.4001	0.783902	0.083499	4.03797	16.2315	1.01356	0.247724	2.19786	0.697261
Closed-Loop	Baseline	22.0521	16.4001	0.783902	0.083499	4.03797	16.2315	1.07285	0.298687	2.52995	0.653879
Closed-Loop	Baseline	22.0521	16.4001	0.783902	0.083499	4.03797	16.2315	1.06376	0.268774	2.31158	0.700368
Closed-Loop	Baseline	22.0521	16.4001	0.783902	0.083499	4.03797	16.2315	1.02588	0.337349	2.02795	0.626073
Closed-Loop	Baseline	22.0521	16.4001	0.783902	0.083499	4.03797	16.2315	1.11955	0.301575	1.8467	0.675618
Closed-Loop	Baseline	22.0521	16.4001	0.783902	0.083499	4.03797	16.2315	0.848103	0.334504	1.23394	0.628187
Closed-Loop	Baseline	22.0521	16.4001	0.783902	0.083499	4.03797	16.2315	1.05046	0.354386	1.94948	0.734696
Closed-Loop	Baseline	22.0521	16.4001	0.783902	0.083499	4.03797	16.2315	1.06265	0.334581	1.9022	0.735829
Closed-Loop	Baseline	22.0521	16.4001	0.783902	0.083499	4.03797	16.2315	0.876044	0.313656	2.11711	0.613487
Closed-Loop	Baseline	22.0521	16.4001	0.783902	0.083499	4.03797	16.2315	0.849713	0.250089	1.95383	0.766694
Closed-Loop	Baseline	22.0521	16.4001	0.783902	0.083499	4.03797	16.2315	0.925406	0.299861	1.90388	0.824871
Closed-Loop	Baseline	22.0521	16.4001	0.783902	0.083499	4.03797	16.2315	0.933846	0.273345	1.46618	0.7023
Closed-Loop	Baseline	22.0521	16.4001	0.783902	0.083499	4.03797	16.2315	1.07534	0.282797	1.71801	0.667944
Closed-Loop	Baseline	22.0521	16.4001	0.783902	0.083499	4.03797	16.2315	0.938546	0.281273	2.143	0.841217
Closed-Loop	Baseline	22.0521	16.4001	0.783902	0.083499	4.03797	16.2315	0.914365	0.251004	2.51477	0.634052
Closed-Loop	Baseline	22.0521	16.4001	0.783902	0.083499	4.03797	16.2315	0.938837	0.202133	1.97074	0.701005
Closed-Loop	Baseline	22.0521	16.4001	0.783902	0.083499	4.03797	16.2315	1.11186	0.266593	2.09834	0.708981
Closed-Loop	Baseline	22.0521	16.4001	0.783902	0.083499	4.03797	16.2315	1.0013	0.309669	2.28574	0.767257
Closed-Loop	Baseline	22.0521	16.4001	0.783902	0.083499	4.03797	16.2315	0.982075	0.232591	1.75673	0.717987
Closed-Loop	Baseline	22.0521	16.4001	0.783902	0.083499	4.03797	16.2315	0.988999	0.300784	2.11004	0.675068
Closed-Loop	Baseline	22.0521	16.4001	0.783902	0.083499	4.03797	16.2315	1.12921	0.395013	1.77785	0.652441
Closed-Loop	Baseline	22.0521	16.4001	0.783902	0.083499	4.03797	16.2315	0.925083	0.351153	2.25945	0.682909
Closed-Loop	Baseline	22.0521	16.4001	0.783902	0.083499	4.03797	16.2315	1.13155	0.382177	2.04542	0.649654
Closed-Loop	Baseline	22.0521	16.4001	0.783902	0.083499	4.03797	16.2315	1.02105	0.319556	2.08954	0.702391
Closed-Loop	Baseline	22.0521	16.4001	0.783902	0.083499	4.03797	16.2315	0.983958	0.358375	1.76522	0.67179
Closed-Loop	Baseline	22.0521	16.4001	0.783902	0.083499	4.03797	16.2315	1.25009	0.263802	2.21211	0.625298
Closed-Loop	Baseline	22.0521	16.4001	0.783902	0.083499	4.03797	16.2315	0.894436	0.267783	2.62541	0.762757
Closed-Loop	Baseline	22.0521	16.4001	0.783902	0.083499	4.03797	16.2315	0.964631	0.163043	1.69763	0.675116
Closed-Loop	Baseline	22.0521	16.4001	0.783902	0.083499	4.03797	16.2315	0.876757	0.359307	1.89807	0.636593
Closed-Loop	Baseline	22.0521	16.4001	0.783902	0.083499	4.03797	16.2315	1.09525	0.377016	2.06948	0.691587
Closed-Loop	Baseline	22.0521	16.4001	0.783902	0.083499	4.03797	16.2315	1.16892	0.272341	2.23592	0.703419
Closed-Loop	Baseline	22.0521	16.4001	0.783902	0.083499	4.03797	16.2315	1.16699	0.287302	1.83214	0.612677
Closed-Loop	Baseline	22.0521	16.4001	0.783902	0.083499	4.03797	16.2315	1.12239	0.262307	1.15009	0.716582
Closed-Loop	Baseline	22.0521	16.4001	0.783902	0.083499	4.03797	16.2315	0.980238	0.319133	2.40776	0.647642
Closed-Loop	Baseline	22.0521	16.4001	0.783902	0.083499	4.03797	16.2315	0.963476	0.356247	2.22815	0.785551
Closed-Loop	Baseline	22.0521	16.4001	0.783902	0.083499	4.03797	16.2315	0.832883	0.212861	1.47712	0.726198
Closed-Loop	Baseline	22.0521	16.4001	0.783902	0.083499	4.03797	16.2315	1.20359	0.320472	1.81773	0.680005
Closed-Loop	Baseline	22.0521	16.4001	0.783902	0.083499	4.03797	16.2315	1.0469	0.286166	2.47045	0.662742
Closed-Loop	Baseline	22.0521	16.4001	0.783902	0.083499	4.03797	16.2315	0.950804	0.30567	2.43434	0.694752
Closed-Loop	Baseline	22.0521	16.4001	0.783902	0.083499	4.03797	16.2315	1.13281	0.32295	2.28159	0.73064
Closed-Loop	Baseline	22.0521	16.4001	0.783902	0.083499	4.03797	16.2315	0.902724	0.29059	1.94717	0.698725
Closed-Loop	Baseline	22.0521	16.4001	0.783902	0.083499	4.03797	16.2315	1.04066	0.294821	2.0249	0.689142
Closed-Loop	Baseline	22.0521	16.4001	0.783902	0.083499	4.03797	16.2315	0.982737	0.289306	1.96072	0.702919
Closed-Loop	Baseline	22.0521	16.4001	0.783902	0.083499	4.03797	16.2315	1.06387	0.348516	2.33847	0.669807
Closed-Loop	Baseline	10.5247	17.0069	1.05772	0.0821609	7.62007	18.3859	0.951638	0.296821	2.12563	0.656208
Closed-Loop	Baseline	10.5247	17.0069	1.05772	0.0821609	7.62007	18.3859	1.08418	0.227454	2.06618	0.65971
Closed-Loop	Baseline	10.5247	17.0069	1.05772	0.0821609	7.62007	18.3859	0.894878	0.303779	1.61871	0.750514
Closed-Loop	Baseline	10.5247	17.0069	1.05772	0.0821609	7.62007	18.3859	0.746823	0.352443	1.88643	0.697782
Closed-Loop	Baseline	10.5247	17.0069	1.05772	0.0821609	7.62007	18.3859	0.977289	0.298539	2.2696	0.768923
Closed-Loop	Baseline	10.5247	17.0069	1.05772	0.0821609	7.62007	18.3859	0.985824	0.338756	2.01131	0.666424
Closed-Loop	Baseline	10.5247	17.0069	1.05772	0.0821609	7.62007	18.3859	1.01356	0.247724	2.19786	0.697261
Closed-Loop	Baseline	10.5247	17.0069	1.05772	0.0821609	7.62007	18.3859	1.07285	0.298687	2.52995	0.653879
Closed-Loop	Baseline	10.5247	17.0069	1.05772	0.0821609	7.62007	18.3859	1.06376	0.268774	2.31158	0.700368
Closed-Loop	Baseline	10.5247	17.0069	1.05772	0.0821609	7.62007	18.3859	1.02588	0.337349	2.02795	0.626073
Closed-Loop	Baseline	10.5247	17.0069	1.05772	0.0821609	7.62007	18.3859	1.11955	0.301575	1.8467	0.675618
Closed-Loop	Baseline	10.5247	17.0069	1.05772	0.0821609	7.62007	18.3859	0.848103	0.334504	1.23394	0.628187
Closed-Loop	Baseline	10.5247	17.0069	1.05772	0.0821609	7.62007	18.3859	1.05046	0.354386	1.94948	0.734696
Closed-Loop	Baseline	10.5247	17.0069	1.05772	0.0821609	7.62007	18.3859	1.06265	0.334581	1.9022	0.735829
Closed-Loop	Baseline	10.5247	17.0069	1.05772	0.0821609	7.62007	18.3859	0.876044	0.313656	2.11711	0.613487
Closed-Loop	Baseline	10.5247	17.0069	1.05772	0.0821609	7.62007	18.3859	0.849713	0.250089	1.95383	0.766694
Closed-Loop	Baseline	10.5247	17.0069	1.05772	0.0821609	7.62007	18.3859	0.925406	0.299861	1.90388	0.824871
Closed-Loop	Baseline	10.5247	17.0069	1.05772	0.0821609	7.62007	18.3859	0.933846	0.273345	1.46618	0.7023
Closed-Loop	Baseline	10.5247	17.0069	1.05772	0.0821609	7.62007	18.3859	1.07534	0.282797	1.71801	0.667944
Closed-Loop	Baseline	10.5247	17.0069	1.05772	0.0821609	7.62007	18.3859	0.938546	0.281273	2.143	0.841217
Closed-Loop	Baseline	10.5247	17.0069	1.05772	0.0821609	7.62007	18.3859	0.914365	0.251004	2.51477	0.634052
Closed-Loop	Baseline	10.5247	17.0069	1.05772	0.0821609	7.62007	18.3859	0.938837	0.202133	1.97074	0.701005
Closed-Loop	Baseline	10.5247	17.0069	1.05772	0.0821609	7.62007	18.3859	1.11186	0.266593	2.09834	0.708981
Closed-Loop	Baseline	10.5247	17.0069	1.05772	0.0821609	7.62007	18.3859	1.0013	0.309669	2.28574	0.767257
Closed-Loop	Baseline	10.5247	17.0069	1.05772	0.0821609	7.62007	18.3859	0.982075	0.232591	1.75673	0.717987
Closed-Loop	Baseline	10.5247	17.0069	1.05772	0.0821609	7.62007	18.3859	0.988999	0.300784	2.11004	0.675068
Closed-Loop	Baseline	10.5247	17.0069	1.05772	0.0821609	7.62007	18.3859	1.12921	0.395013	1.77785	0.652441
Closed-Loop	Baseline	10.5247	17.0069	1.05772	0.0821609	7.62007	18.3859	0.925083	0.351153	2.25945	0.682909
Closed-Loop	Baseline	10.5247	17.0069	1.05772	0.0821609	7.62007	18.3859	1.13155	0.382177	2.04542	0.649654
Closed-Loop	Baseline	10.5247	17.0069	1.05772	0.0821609	7.62007	18.3859	1.02105	0.319556	2.08954	0.702391
Closed-Loop	Baseline	10.5247	17.0069	1.05772	0.0821609	7.62007	18.3859	0.983958	0.358375	1.76522	0.67179
Closed-Loop	Baseline	10.5247	17.0069	1.05772	0.0821609	7.62007	18.3859	1.25009	0.263802	2.21211	0.625298
Closed-Loop	Baseline	10.5247	17.0069	1.05772	0.0821609	7.62007	18.3859	0.894436	0.267783	2.62541	0.762757
Closed-Loop	Baseline	10.5247	17.0069	1.05772	0.0821609	7.62007	18.3859	0.964631	0.163043	1.69763	0.675116
Closed-Loop	Baseline	10.5247	17.0069	1.05772	0.0821609	7.62007	18.3859	0.876757	0.359307	1.89807	0.636593
Closed-Loop	Baseline	10.5247	17.0069	1.05772	0.0821609	7.62007	18.3859	1.09525	0.377016	2.06948	0.691587
Closed-Loop	Baseline	10.5247	17.0069	1.05772	0.0821609	7.62007	18.3859	1.16892	0.272341	2.23592	0.703419
Closed-Loop	Baseline	10.5247	17.0069	1.05772	0.0821609	7.62007	18.3859	1.16699	0.287302	1.83214	0.612677
Closed-Loop	Baseline	10.5247	17.0069	1.05772	0.0821609	7.62007	18.3859	1.12239	0.262307	1.15009	0.716582
Closed-Loop	Baseline	10.5247	17.0069	1.05772	0.0821609	7.62007	18.3859	0.980238	0.319133	2.40776	0.647642
Closed-Loop	Baseline	10.5247	17.0069	1.05772	0.0821609	7.62007	18.3859	0.963476	0.356247	2.22815	0.785551
Closed-Loop	Baseline	10.5247	17.0069	1.05772	0.0821609	7.62007	18.3859	0.832883	0.212861	1.47712	0.726198
Closed-Loop	Baseline	10.5247	17.0069	1.05772	0.0821609	7.62007	18.3859	1.20359	0.320472	1.81773	0.680005
Closed-Loop	Baseline	10.5247	17.0069	1.05772	0.0821609	7.62007	18.3859	1.0469	0.286166	2.47045	0.662742
Closed-Loop	Baseline	10.5247	17.0069	1.05772	0.0821609	7.62007	18.3859	0.950804	0.30567	2.43434	0.694752
Closed-Loop	Baseline	10.5247	17.0069	1.05772	0.0821609	7.62007	18.3859	1.13281	0.32295	2.28159	0.73064
Closed-Loop	Baseline	10.5247	17.0069	1.05772	0.0821609	7.62007	18.3859	0.902724	0.29059	1.94717	0.698725
Closed-Loop	Baseline	10.5247	17.0069	1.05772	0.0821609	7.62007	18.3859	1.04066	0.294821	2.0249	0.689142
Closed-Loop	Baseline	10.5247	17.0069	1.05772	0.0821609	7.62007	18.3859	0.982737	0.289306	1.96072	0.702919
Closed-Loop	Baseline	10.5247	17.0069	1.05772	0.0821609	7.62007	18.3859	1.06387	0.348516	2.33847	0.669807
Closed-Loop	Baseline	17.5525	15.865	0.892005	0.0760135	5.36593	11.9059	0.951638	0.296821	2.12563	0.656208
Closed-Loop	Baseline	17.5525	15.865	0.892005	0.0760135	5.36593	11.9059	1.08418	0.227454	2.06618	0.65971
Closed-Loop	Baseline	17.5525	15.865	0.892005	0.0760135	5.36593	11.9059	0.894878	0.303779	1.61871	0.750514
Closed-Loop	Baseline	17.5525	15.865	0.892005	0.0760135	5.36593	11.9059	0.746823	0.352443	1.88643	0.697782
Closed-Loop	Baseline	17.5525	15.865	0.892005	0.0760135	5.36593	11.9059	0.977289	0.298539	2.2696	0.768923
Closed-Loop	Baseline	17.5525	15.865	0.892005	0.0760135	5.36593	11.9059	0.985824	0.338756	2.01131	0.666424
Closed-Loop	Baseline	17.5525	15.865	0.892005	0.0760135	5.36593	11.9059	1.01356	0.247724	2.19786	0.697261
Closed-Loop	Baseline	17.5525	15.865	0.892005	0.0760135	5.36593	11.9059	1.07285	0.298687	2.52995	0.653879
Closed-Loop	Baseline	17.5525	15.865	0.892005	0.0760135	5.36593	11.9059	1.06376	0.268774	2.31158	0.700368
Closed-Loop	Baseline	17.5525	15.865	0.892005	0.0760135	5.36593	11.9059	1.02588	0.337349	2.02795	0.626073
Closed-Loop	Baseline	17.5525	15.865	0.892005	0.0760135	5.36593	11.9059	1.11955	0.301575	1.8467	0.675618
Closed-Loop	Baseline	17.5525	15.865	0.892005	0.0760135	5.36593	11.9059	0.848103	0.334504	1.23394	0.628187
Closed-Loop	Baseline	17.5525	15.865	0.892005	0.0760135	5.36593	11.9059	1.05046	0.354386	1.94948	0.734696
Closed-Loop	Baseline	17.5525	15.865	0.892005	0.0760135	5.36593	11.9059	1.06265	0.334581	1.9022	0.735829
Closed-Loop	Baseline	17.5525	15.865	0.892005	0.0760135	5.36593	11.9059	0.876044	0.313656	2.11711	0.613487
Closed-Loop	Baseline	17.5525	15.865	0.892005	0.0760135	5.36593	11.9059	0.849713	0.250089	1.95383	0.766694
Closed-Loop	Baseline	17.5525	15.865	0.892005	0.0760135	5.36593	11.9059	0.925406	0.299861	1.90388	0.824871
Closed-Loop	Baseline	17.5525	15.865	0.892005	0.0760135	5.36593	11.9059	0.933846	0.273345	1.46618	0.7023
Closed-Loop	Baseline	17.5525	15.865	0.892005	0.0760135	5.36593	11.9059	1.07534	0.282797	1.71801	0.667944
Closed-Loop	Baseline	17.5525	15.865	0.892005	0.0760135	5.36593	11.9059	0.938546	0.281273	2.143	0.841217
Closed-Loop	Baseline	17.5525	15.865	0.892005	0.0760135	5.36593	11.9059	0.914365	0.251004	2.51477	0.634052
Closed-Loop	Baseline	17.5525	15.865	0.892005	0.0760135	5.36593	11.9059	0.938837	0.202133	1.97074	0.701005
Closed-Loop	Baseline	17.5525	15.865	0.892005	0.0760135	5.36593	11.9059	1.11186	0.266593	2.09834	0.708981
Closed-Loop	Baseline	17.5525	15.865	0.892005	0.0760135	5.36593	11.9059	1.0013	0.309669	2.28574	0.767257
Closed-Loop	Baseline	17.5525	15.865	0.892005	0.0760135	5.36593	11.9059	0.982075	0.232591	1.75673	0.717987
Closed-Loop	Baseline	17.5525	15.865	0.892005	0.0760135	5.36593	11.9059	0.988999	0.300784	2.11004	0.675068
Closed-Loop	Baseline	17.5525	15.865	0.892005	0.0760135	5.36593	11.9059	1.12921	0.395013	1.77785	0.652441
Closed-Loop	Baseline	17.5525	15.865	0.892005	0.0760135	5.36593	11.9059	0.925083	0.351153	2.25945	0.682909
Closed-Loop	Baseline	17.5525	15.865	0.892005	0.0760135	5.36593	11.9059	1.13155	0.382177	2.04542	0.649654
Closed-Loop	Baseline	17.5525	15.865	0.892005	0.0760135	5.36593	11.9059	1.02105	0.319556	2.08954	0.702391
Closed-Loop	Baseline	17.5525	15.865	0.892005	0.0760135	5.36593	11.9059	0.983958	0.358375	1.76522	0.67179
Closed-Loop	Baseline	17.5525	15.865	0.892005	0.0760135	5.36593	11.9059	1.25009	0.263802	2.21211	0.625298
Closed-Loop	Baseline	17.5525	15.865	0.892005	0.0760135	5.36593	11.9059	0.894436	0.267783	2.62541	0.762757
Closed-Loop	Baseline	17.5525	15.865	0.892005	0.0760135	5.36593	11.9059	0.964631	0.163043	1.69763	0.675116
Closed-Loop	Baseline	17.5525	15.865	0.892005	0.0760135	5.36593	11.9059	0.876757	0.359307	1.89807	0.636593
Closed-Loop	Baseline	17.5525	15.865	0.892005	0.0760135	5.36593	11.9059	1.09525	0.377016	2.06948	0.691587
Closed-Loop	Baseline	17.5525	15.865	0.892005	0.0760135	5.36593	11.9059	1.16892	0.272341	2.23592	0.703419
Closed-Loop	Baseline	17.5525	15.865	0.892005	0.0760135	5.36593	11.9059	1.16699	0.287302	1.83214	0.612677
Closed-Loop	Baseline	17.5525	15.865	0.892005	0.0760135	5.36593	11.9059	1.12239	0.262307	1.15009	0.716582
Closed-Loop	Baseline	17.5525	15.865	0.892005	0.0760135	5.36593	11.9059	0.980238	0.319133	2.40776	0.647642
Closed-Loop	Baseline	17.5525	15.865	0.892005	0.0760135	5.36593	11.9059	0.963476	0.356247	2.22815	0.785551
Closed-Loop	Baseline	17.5525	15.865	0.892005	0.0760135	5.36593	11.9059	0.832883	0.212861	1.47712	0.726198
Closed-Loop	Baseline	17.5525	15.865	0.892005	0.0760135	5.36593	11.9059	1.20359	0.320472	1.81773	0.680005
Closed-Loop	Baseline	17.5525	15.865	0.892005	0.0760135	5.36593	11.9059	1.0469	0.286166	2.47045	0.662742
Closed-Loop	Baseline	17.5525	15.865	0.892005	0.0760135	5.36593	11.9059	0.950804	0.30567	2.43434	0.694752
Closed-Loop	Baseline	17.5525	15.865	0.892005	0.0760135	5.36593	11.9059	1.13281	0.32295	2.28159	0.73064
Closed-Loop	Baseline	17.5525	15.865	0.892005	0.0760135	5.36593	11.9059	0.902724	0.29059	1.94717	0.698725
Closed-Loop	Baseline	17.5525	15.865	0.892005	0.0760135	5.36593	11.9059	1.04066	0.294821	2.0249	0.689142
Closed-Loop	Baseline	17.5525	15.865	0.892005	0.0760135	5.36593	11.9059	0.982737	0.289306	1.96072	0.702919
Closed-Loop	Baseline	17.5525	15.865	0.892005	0.0760135	5.36593	11.9059	1.06387	0.348516	2.33847	0.669807
Closed-Loop	Baseline	15.6244	13.5187	0.90227	0.0285446	5.93284	11.5912	0.951638	0.296821	2.12563	0.656208
Closed-Loop	Baseline	15.6244	13.5187	0.90227	0.0285446	5.93284	11.5912	1.08418	0.227454	2.06618	0.65971
Closed-Loop	Baseline	15.6244	13.5187	0.90227	0.0285446	5.93284	11.5912	0.894878	0.303779	1.61871	0.750514
Closed-Loop	Baseline	15.6244	13.5187	0.90227	0.0285446	5.93284	11.5912	0.746823	0.352443	1.88643	0.697782
Closed-Loop	Baseline	15.6244	13.5187	0.90227	0.0285446	5.93284	11.5912	0.977289	0.298539	2.2696	0.768923
Closed-Loop	Baseline	15.6244	13.5187	0.90227	0.0285446	5.93284	11.5912	0.985824	0.338756	2.01131	0.666424
Closed-Loop	Baseline	15.6244	13.5187	0.90227	0.0285446	5.93284	11.5912	1.01356	0.247724	2.19786	0.697261
Closed-Loop	Baseline	15.6244	13.5187	0.90227	0.0285446	5.93284	11.5912	1.07285	0.298687	2.52995	0.653879
Closed-Loop	Baseline	15.6244	13.5187	0.90227	0.0285446	5.93284	11.5912	1.06376	0.268774	2.31158	0.700368
Closed-Loop	Baseline	15.6244	13.5187	0.90227	0.0285446	5.93284	11.5912	1.02588	0.337349	2.02795	0.626073
Closed-Loop	Baseline	15.6244	13.5187	0.90227	0.0285446	5.93284	11.5912	1.11955	0.301575	1.8467	0.675618
Closed-Loop	Baseline	15.6244	13.5187	0.90227	0.0285446	5.93284	11.5912	0.848103	0.334504	1.23394	0.628187
Closed-Loop	Baseline	15.6244	13.5187	0.90227	0.0285446	5.93284	11.5912	1.05046	0.354386	1.94948	0.734696
Closed-Loop	Baseline	15.6244	13.5187	0.90227	0.0285446	5.93284	11.5912	1.06265	0.334581	1.9022	0.735829
Closed-Loop	Baseline	15.6244	13.5187	0.90227	0.0285446	5.93284	11.5912	0.876044	0.313656	2.11711	0.613487
Closed-Loop	Baseline	15.6244	13.5187	0.90227	0.0285446	5.93284	11.5912	0.849713	0.250089	1.95383	0.766694
Closed-Loop	Baseline	15.6244	13.5187	0.90227	0.0285446	5.93284	11.5912	0.925406	0.299861	1.90388	0.824871
Closed-Loop	Baseline	15.6244	13.5187	0.90227	0.0285446	5.93284	11.5912	0.933846	0.273345	1.46618	0.7023
Closed-Loop	Baseline	15.6244	13.5187	0.90227	0.0285446	5.93284	11.5912	1.07534	0.282797	1.71801	0.667944
Closed-Loop	Baseline	15.6244	13.5187	0.90227	0.0285446	5.93284	11.5912	0.938546	0.281273	2.143	0.841217
Closed-Loop	Baseline	15.6244	13.5187	0.90227	0.0285446	5.93284	11.5912	0.914365	0.251004	2.51477	0.634052
Closed-Loop	Baseline	15.6244	13.5187	0.90227	0.0285446	5.93284	11.5912	0.938837	0.202133	1.97074	0.701005
Closed-Loop	Baseline	15.6244	13.5187	0.90227	0.0285446	5.93284	11.5912	1.11186	0.266593	2.09834	0.708981
Closed-Loop	Baseline	15.6244	13.5187	0.90227	0.0285446	5.93284	11.5912	1.0013	0.309669	2.28574	0.767257
Closed-Loop	Baseline	15.6244	13.5187	0.90227	0.0285446	5.93284	11.5912	0.982075	0.232591	1.75673	0.717987
Closed-Loop	Baseline	15.6244	13.5187	0.90227	0.0285446	5.93284	11.5912	0.988999	0.300784	2.11004	0.675068
Closed-Loop	Baseline	15.6244	13.5187	0.90227	0.0285446	5.93284	11.5912	1.12921	0.395013	1.77785	0.652441
Closed-Loop	Baseline	15.6244	13.5187	0.90227	0.0285446	5.93284	11.5912	0.925083	0.351153	2.25945	0.682909
Closed-Loop	Baseline	15.6244	13.5187	0.90227	0.0285446	5.93284	11.5912	1.13155	0.382177	2.04542	0.649654
Closed-Loop	Baseline	15.6244	13.5187	0.90227	0.0285446	5.93284	11.5912	1.02105	0.319556	2.08954	0.702391
Closed-Loop	Baseline	15.6244	13.5187	0.90227	0.0285446	5.93284	11.5912	0.983958	0.358375	1.76522	0.67179
Closed-Loop	Baseline	15.6244	13.5187	0.90227	0.0285446	5.93284	11.5912	1.25009	0.263802	2.21211	0.625298
Closed-Loop	Baseline	15.6244	13.5187	0.90227	0.0285446	5.93284	11.5912	0.894436	0.267783	2.62541	0.762757
Closed-Loop	Baseline	15.6244	13.5187	0.90227	0.0285446	5.93284	11.5912	0.964631	0.163043	1.69763	0.675116
Closed-Loop	Baseline	15.6244	13.5187	0.90227	0.0285446	5.93284	11.5912	0.876757	0.359307	1.89807	0.636593
Closed-Loop	Baseline	15.6244	13.5187	0.90227	0.0285446	5.93284	11.5912	1.09525	0.377016	2.06948	0.691587
Closed-Loop	Baseline	15.6244	13.5187	0.90227	0.0285446	5.93284	11.5912	1.16892	0.272341	2.23592	0.703419
Closed-Loop	Baseline	15.6244	13.5187	0.90227	0.0285446	5.93284	11.5912	1.16699	0.287302	1.83214	0.612677
Closed-Loop	Baseline	15.6244	13.5187	0.90227	0.0285446	5.93284	11.5912	1.12239	0.262307	1.15009	0.716582
Closed-Loop	Baseline	15.6244	13.5187	0.90227	0.0285446	5.93284	11.5912	0.980238	0.319133	2.40776	0.647642
Closed-Loop	Baseline	15.6244	13.5187	0.90227	0.0285446	5.93284	11.5912	0.963476	0.356247	2.22815	0.785551
Closed-Loop	Baseline	15.6244	13.5187	0.90227	0.0285446	5.93284	11.5912	0.832883	0.212861	1.47712	0.726198
Closed-Loop	Baseline	15.6244	13.5187	0.90227	0.0285446	5.93284	11.5912	1.20359	0.320472	1.81773	0.680005
Closed-Loop	Baseline	15.6244	13.5187	0.90227	0.0285446	5.93284	11.5912	1.0469	0.286166	2.47045	0.662742
Closed-Loop	Baseline	15.6244	13.5187	0.90227	0.0285446	5.93284	11.5912	0.950804	0.30567	2.43434	0.694752
Closed-Loop	Baseline	15.6244	13.5187	0.90227	0.0285446	5.93284	11.5912	1.13281	0.32295	2.28159	0.73064
Closed-Loop	Baseline	15.6244	13.5187	0.90227	0.0285446	5.93284	11.5912	0.902724	0.29059	1.94717	0.698725
Closed-Loop	Baseline	15.6244	13.5187	0.90227	0.0285446	5.93284	11.5912	1.04066	0.294821	2.0249	0.689142
Closed-Loop	Baseline	15.6244	13.5187	0.90227	0.0285446	5.93284	11.5912	0.982737	0.289306	1.96072	0.702919
Closed-Loop	Baseline	15.6244	13.5187	0.90227	0.0285446	5.93284	11.5912	1.06387	0.348516	2.33847	0.669807
Closed-Loop	Baseline	16.8296	14.706	0.568558	0.0687776	4.67877	10.875	0.951638	0.296821	2.12563	0.656208
Closed-Loop	Baseline	16.8296	14.706	0.568558	0.0687776	4.67877	10.875	1.08418	0.227454	2.06618	0.65971
Closed-Loop	Baseline	16.8296	14.706	0.568558	0.0687776	4.67877	10.875	0.894878	0.303779	1.61871	0.750514
Closed-Loop	Baseline	16.8296	14.706	0.568558	0.0687776	4.67877	10.875	0.746823	0.352443	1.88643	0.697782
Closed-Loop	Baseline	16.8296	14.706	0.568558	0.0687776	4.67877	10.875	0.977289	0.298539	2.2696	0.768923
Closed-Loop	Baseline	16.8296	14.706	0.568558	0.0687776	4.67877	10.875	0.985824	0.338756	2.01131	0.666424
Closed-Loop	Baseline	16.8296	14.706	0.568558	0.0687776	4.67877	10.875	1.01356	0.247724	2.19786	0.697261
Closed-Loop	Baseline	16.8296	14.706	0.568558	0.0687776	4.67877	10.875	1.07285	0.298687	2.52995	0.653879
Closed-Loop	Baseline	16.8296	14.706	0.568558	0.0687776	4.67877	10.875	1.06376	0.268774	2.31158	0.700368
Closed-Loop	Baseline	16.8296	14.706	0.568558	0.0687776	4.67877	10.875	1.02588	0.337349	2.02795	0.626073
Closed-Loop	Baseline	16.8296	14.706	0.568558	0.0687776	4.67877	10.875	1.11955	0.301575	1.8467	0.675618
Closed-Loop	Baseline	16.8296	14.706	0.568558	0.0687776	4.67877	10.875	0.848103	0.334504	1.23394	0.628187
Closed-Loop	Baseline	16.8296	14.706	0.568558	0.0687776	4.67877	10.875	1.05046	0.354386	1.94948	0.734696
Closed-Loop	Baseline	16.8296	14.706	0.568558	0.0687776	4.67877	10.875	1.06265	0.334581	1.9022	0.735829
Closed-Loop	Baseline	16.8296	14.706	0.568558	0.0687776	4.67877	10.875	0.876044	0.313656	2.11711	0.613487
Closed-Loop	Baseline	16.8296	14.706	0.568558	0.0687776	4.67877	10.875	0.849713	0.250089	1.95383	0.766694
Closed-Loop	Baseline	16.8296	14.706	0.568558	0.0687776	4.67877	10.875	0.925406	0.299861	1.90388	0.824871
Closed-Loop	Baseline	16.8296	14.706	0.568558	0.0687776	4.67877	10.875	0.933846	0.273345	1.46618	0.7023
Closed-Loop	Baseline	16.8296	14.706	0.568558	0.0687776	4.67877	10.875	1.07534	0.282797	1.71801	0.667944
Closed-Loop	Baseline	16.8296	14.706	0.568558	0.0687776	4.67877	10.875	0.938546	0.281273	2.143	0.841217
Closed-Loop	Baseline	16.8296	14.706	0.568558	0.0687776	4.67877	10.875	0.914365	0.251004	2.51477	0.634052
Closed-Loop	Baseline	16.8296	14.706	0.568558	0.0687776	4.67877	10.875	0.938837	0.202133	1.97074	0.701005
Closed-Loop	Baseline	16.8296	14.706	0.568558	0.0687776	4.67877	10.875	1.11186	0.266593	2.09834	0.708981
Closed-Loop	Baseline	16.8296	14.706	0.568558	0.0687776	4.67877	10.875	1.0013	0.309669	2.28574	0.767257
Closed-Loop	Baseline	16.8296	14.706	0.568558	0.0687776	4.67877	10.875	0.982075	0.232591	1.75673	0.717987
Closed-Loop	Baseline	16.8296	14.706	0.568558	0.0687776	4.67877	10.875	0.988999	0.300784	2.11004	0.675068
Closed-Loop	Baseline	16.8296	14.706	0.568558	0.0687776	4.67877	10.875	1.12921	0.395013	1.77785	0.652441
Closed-Loop	Baseline	16.8296	14.706	0.568558	0.0687776	4.67877	10.875	0.925083	0.351153	2.25945	0.682909
Closed-Loop	Baseline	16.8296	14.706	0.568558	0.0687776	4.67877	10.875	1.13155	0.382177	2.04542	0.649654
Closed-Loop	Baseline	16.8296	14.706	0.568558	0.0687776	4.67877	10.875	1.02105	0.319556	2.08954	0.702391
Closed-Loop	Baseline	16.8296	14.706	0.568558	0.0687776	4.67877	10.875	0.983958	0.358375	1.76522	0.67179
Closed-Loop	Baseline	16.8296	14.706	0.568558	0.0687776	4.67877	10.875	1.25009	0.263802	2.21211	0.625298
Closed-Loop	Baseline	16.8296	14.706	0.568558	0.0687776	4.67877	10.875	0.894436	0.267783	2.62541	0.762757
Closed-Loop	Baseline	16.8296	14.706	0.568558	0.0687776	4.67877	10.875	0.964631	0.163043	1.69763	0.675116
Closed-Loop	Baseline	16.8296	14.706	0.568558	0.0687776	4.67877	10.875	0.876757	0.359307	1.89807	0.636593
Closed-Loop	Baseline	16.8296	14.706	0.568558	0.0687776	4.67877	10.875	1.09525	0.377016	2.06948	0.691587
Closed-Loop	Baseline	16.8296	14.706	0.568558	0.0687776	4.67877	10.875	1.16892	0.272341	2.23592	0.703419
Closed-Loop	Baseline	16.8296	14.706	0.568558	0.0687776	4.67877	10.875	1.16699	0.287302	1.83214	0.612677
Closed-Loop	Baseline	16.8296	14.706	0.568558	0.0687776	4.67877	10.875	1.12239	0.262307	1.15009	0.716582
Closed-Loop	Baseline	16.8296	14.706	0.568558	0.0687776	4.67877	10.875	0.980238	0.319133	2.40776	0.647642
Closed-Loop	Baseline	16.8296	14.706	0.568558	0.0687776	4.67877	10.875	0.963476	0.356247	2.22815	0.785551
Closed-Loop	Baseline	16.8296	14.706	0.568558	0.0687776	4.67877	10.875	0.832883	0.212861	1.47712	0.726198
Closed-Loop	Baseline	16.8296	14.706	0.568558	0.0687776	4.67877	10.875	1.20359	0.320472	1.81773	0.680005
Closed-Loop	Baseline	16.8296	14.706	0.568558	0.0687776	4.67877	10.875	1.0469	0.286166	2.47045	0.662742
Closed-Loop	Baseline	16.8296	14.706	0.568558	0.0687776	4.67877	10.875	0.950804	0.30567	2.43434	0.694752
Closed-Loop	Baseline	16.8296	14.706	0.568558	0.0687776	4.67877	10.875	1.13281	0.32295	2.28159	0.73064
Closed-Loop	Baseline	16.8296	14.706	0.568558	0.0687776	4.67877	10.875	0.902724	0.29059	1.94717	0.698725
Closed-Loop	Baseline	16.8296	14.706	0.568558	0.0687776	4.67877	10.875	1.04066	0.294821	2.0249	0.689142
Closed-Loop	Baseline	16.8296	14.706	0.568558	0.0687776	4.67877	10.875	0.982737	0.289306	1.96072	0.702919
Closed-Loop	Baseline	16.8296	14.706	0.568558	0.0687776	4.67877	10.875	1.06387	0.348516	2.33847	0.669807
Closed-Loop	Baseline	21.259	14.1632	0.967398	0.102872	2.35185	13.7566	0.951638	0.296821	2.12563	0.656208
Closed-Loop	Baseline	21.259	14.1632	0.967398	0.102872	2.35185	13.7566	1.08418	0.227454	2.06618	0.65971
Closed-Loop	Baseline	21.259	14.1632	0.967398	0.102872	2.35185	13.7566	0.894878	0.303779	1.61871	0.750514
Closed-Loop	Baseline	21.259	14.1632	0.967398	0.102872	2.35185	13.7566	0.746823	0.352443	1.88643	0.697782
Closed-Loop	Baseline	21.259	14.1632	0.967398	0.102872	2.35185	13.7566	0.977289	0.298539	2.2696	0.768923
Closed-Loop	Baseline	21.259	14.1632	0.967398	0.102872	2.35185	13.7566	0.985824	0.338756	2.01131	0.666424
Closed-Loop	Baseline	21.259	14.1632	0.967398	0.102872	2.35185	13.7566	1.01356	0.247724	2.19786	0.697261
Closed-Loop	Baseline	21.259	14.1632	0.967398	0.102872	2.35185	13.7566	1.07285	0.298687	2.52995	0.653879
Closed-Loop	Baseline	21.259	14.1632	0.967398	0.102872	2.35185	13.7566	1.06376	0.268774	2.31158	0.700368
Closed-Loop	Baseline	21.259	14.1632	0.967398	0.102872	2.35185	13.7566	1.02588	0.337349	2.02795	0.626073
Closed-Loop	Baseline	21.259	14.1632	0.967398	0.102872	2.35185	13.7566	1.11955	0.301575	1.8467	0.675618
Closed-Loop	Baseline	21.259	14.1632	0.967398	0.102872	2.35185	13.7566	0.848103	0.334504	1.23394	0.628187
Closed-Loop	Baseline	21.259	14.1632	0.967398	0.102872	2.35185	13.7566	1.05046	0.354386	1.94948	0.734696
Closed-Loop	Baseline	21.259	14.1632	0.967398	0.102872	2.35185	13.7566	1.06265	0.334581	1.9022	0.735829
Closed-Loop	Baseline	21.259	14.1632	0.967398	0.102872	2.35185	13.7566	0.876044	0.313656	2.11711	0.613487
Closed-Loop	Baseline	21.259	14.1632	0.967398	0.102872	2.35185	13.7566	0.849713	0.250089	1.95383	0.766694
Closed-Loop	Baseline	21.259	14.1632	0.967398	0.102872	2.35185	13.7566	0.925406	0.299861	1.90388	0.824871
Closed-Loop	Baseline	21.259	14.1632	0.967398	0.102872	2.35185	13.7566	0.933846	0.273345	1.46618	0.7023
Closed-Loop	Baseline	21.259	14.1632	0.967398	0.102872	2.35185	13.7566	1.07534	0.282797	1.71801	0.667944
Closed-Loop	Baseline	21.259	14.1632	0.967398	0.102872	2.35185	13.7566	0.938546	0.281273	2.143	0.841217
Closed-Loop	Baseline	21.259	14.1632	0.967398	0.102872	2.35185	13.7566	0.914365	0.251004	2.51477	0.634052
Closed-Loop	Baseline	21.259	14.1632	0.967398	0.102872	2.35185	13.7566	0.938837	0.202133	1.97074	0.701005
Closed-Loop	Baseline	21.259	14.1632	0.967398	0.102872	2.35185	13.7566	1.11186	0.266593	2.09834	0.708981
Closed-Loop	Baseline	21.259	14.1632	0.967398	0.102872	2.35185	13.7566	1.0013	0.309669	2.28574	0.767257
Closed-Loop	Baseline	21.259	14.1632	0.967398	0.102872	2.35185	13.7566	0.982075	0.232591	1.75673	0.717987
Closed-Loop	Baseline	21.259	14.1632	0.967398	0.102872	2.35185	13.7566	0.988999	0.300784	2.11004	0.675068
Closed-Loop	Baseline	21.259	14.1632	0.967398	0.102872	2.35185	13.7566	1.12921	0.395013	1.77785	0.652441
Closed-Loop	Baseline	21.259	14.1632	0.967398	0.102872	2.35185	13.7566	0.925083	0.351153	2.25945	0.682909
Closed-Loop	Baseline	21.259	14.1632	0.967398	0.102872	2.35185	13.7566	1.13155	0.382177	2.04542	0.649654
Closed-Loop	Baseline	21.259	14.1632	0.967398	0.102872	2.35185	13.7566	1.02105	0.319556	2.08954	0.702391
Closed-Loop	Baseline	21.259	14.1632	0.967398	0.102872	2.35185	13.7566	0.983958	0.358375	1.76522	0.67179
Closed-Loop	Baseline	21.259	14.1632	0.967398	0.102872	2.35185	13.7566	1.25009	0.263802	2.21211	0.625298
Closed-Loop	Baseline	21.259	14.1632	0.967398	0.102872	2.35185	13.7566	0.894436	0.267783	2.62541	0.762757
Closed-Loop	Baseline	21.259	14.1632	0.967398	0.102872	2.35185	13.7566	0.964631	0.163043	1.69763	0.675116
Closed-Loop	Baseline	21.259	14.1632	0.967398	0.102872	2.35185	13.7566	0.876757	0.359307	1.89807	0.636593
Closed-Loop	Baseline	21.259	14.1632	0.967398	0.102872	2.35185	13.7566	1.09525	0.377016	2.06948	0.691587
Closed-Loop	Baseline	21.259	14.1632	0.967398	0.102872	2.35185	13.7566	1.16892	0.272341	2.23592	0.703419
Closed-Loop	Baseline	21.259	14.1632	0.967398	0.102872	2.35185	13.7566	1.16699	0.287302	1.83214	0.612677
Closed-Loop	Baseline	21.259	14.1632	0.967398	0.102872	2.35185	13.7566	1.12239	0.262307	1.15009	0.716582
Closed-Loop	Baseline	21.259	14.1632	0.967398	0.102872	2.35185	13.7566	0.980238	0.319133	2.40776	0.647642
Closed-Loop	Baseline	21.259	14.1632	0.967398	0.102872	2.35185	13.7566	0.963476	0.356247	2.22815	0.785551
Closed-Loop	Baseline	21.259	14.1632	0.967398	0.102872	2.35185	13.7566	0.832883	0.212861	1.47712	0.726198
Closed-Loop	Baseline	21.259	14.1632	0.967398	0.102872	2.35185	13.7566	1.20359	0.320472	1.81773	0.680005
Closed-Loop	Baseline	21.259	14.1632	0.967398	0.102872	2.35185	13.7566	1.0469	0.286166	2.47045	0.662742
Closed-Loop	Baseline	21.259	14.1632	0.967398	0.102872	2.35185	13.7566	0.950804	0.30567	2.43434	0.694752
Closed-Loop	Baseline	21.259	14.1632	0.967398	0.102872	2.35185	13.7566	1.13281	0.32295	2.28159	0.73064
Closed-Loop	Baseline	21.259	14.1632	0.967398	0.102872	2.35185	13.7566	0.902724	0.29059	1.94717	0.698725
Closed-Loop	Baseline	21.259	14.1632	0.967398	0.102872	2.35185	13.7566	1.04066	0.294821	2.0249	0.689142
Closed-Loop	Baseline	21.259	14.1632	0.967398	0.102872	2.35185	13.7566	0.982737	0.289306	1.96072	0.702919
Closed-Loop	Baseline	21.259	14.1632	0.967398	0.102872	2.35185	13.7566	1.06387	0.348516	2.33847	0.669807
Closed-Loop	Baseline	17.3925	18.3605	0.659104	0.104703	5.05022	15.0612	0.951638	0.296821	2.12563	0.656208
Closed-Loop	Baseline	17.3925	18.3605	0.659104	0.104703	5.05022	15.0612	1.08418	0.227454	2.06618	0.65971
Closed-Loop	Baseline	17.3925	18.3605	0.659104	0.104703	5.05022	15.0612	0.894878	0.303779	1.61871	0.750514
Closed-Loop	Baseline	17.3925	18.3605	0.659104	0.104703	5.05022	15.0612	0.746823	0.352443	1.88643	0.697782
Closed-Loop	Baseline	17.3925	18.3605	0.659104	0.104703	5.05022	15.0612	0.977289	0.298539	2.2696	0.768923
Closed-Loop	Baseline	17.3925	18.3605	0.659104	0.104703	5.05022	15.0612	0.985824	0.338756	2.01131	0.666424
Closed-Loop	Baseline	17.3925	18.3605	0.659104	0.104703	5.05022	15.0612	1.01356	0.247724	2.19786	0.697261
Closed-Loop	Baseline	17.3925	18.3605	0.659104	0.104703	5.05022	15.0612	1.07285	0.298687	2.52995	0.653879
Closed-Loop	Baseline	17.3925	18.3605	0.659104	0.104703	5.05022	15.0612	1.06376	0.268774	2.31158	0.700368
Closed-Loop	Baseline	17.3925	18.3605	0.659104	0.104703	5.05022	15.0612	1.02588	0.337349	2.02795	0.626073
Closed-Loop	Baseline	17.3925	18.3605	0.659104	0.104703	5.05022	15.0612	1.11955	0.301575	1.8467	0.675618
Closed-Loop	Baseline	17.3925	18.3605	0.659104	0.104703	5.05022	15.0612	0.848103	0.334504	1.23394	0.628187
Closed-Loop	Baseline	17.3925	18.3605	0.659104	0.104703	5.05022	15.0612	1.05046	0.354386	1.94948	0.734696
Closed-Loop	Baseline	17.3925	18.3605	0.659104	0.104703	5.05022	15.0612	1.06265	0.334581	1.9022	0.735829
Closed-Loop	Baseline	17.3925	18.3605	0.659104	0.104703	5.05022	15.0612	0.876044	0.313656	2.11711	0.613487
Closed-Loop	Baseline	17.3925	18.3605	0.659104	0.104703	5.05022	15.0612	0.849713	0.250089	1.95383	0.766694
Closed-Loop	Baseline	17.3925	18.3605	0.659104	0.104703	5.05022	15.0612	0.925406	0.299861	1.90388	0.824871
Closed-Loop	Baseline	17.3925	18.3605	0.659104	0.104703	5.05022	15.0612	0.933846	0.273345	1.46618	0.7023
Closed-Loop	Baseline	17.3925	18.3605	0.659104	0.104703	5.05022	15.0612	1.07534	0.282797	1.71801	0.667944
Closed-Loop	Baseline	17.3925	18.3605	0.659104	0.104703	5.05022	15.0612	0.938546	0.281273	2.143	0.841217
Closed-Loop	Baseline	17.3925	18.3605	0.659104	0.104703	5.05022	15.0612	0.914365	0.251004	2.51477	0.634052
Closed-Loop	Baseline	17.3925	18.3605	0.659104	0.104703	5.05022	15.0612	0.938837	0.202133	1.97074	0.701005
Closed-Loop	Baseline	17.3925	18.3605	0.659104	0.104703	5.05022	15.0612	1.11186	0.266593	2.09834	0.708981
Closed-Loop	Baseline	17.3925	18.3605	0.659104	0.104703	5.05022	15.0612	1.0013	0.309669	2.28574	0.767257
Closed-Loop	Baseline	17.3925	18.3605	0.659104	0.104703	5.05022	15.0612	0.982075	0.232591	1.75673	0.717987
Closed-Loop	Baseline	17.3925	18.3605	0.659104	0.104703	5.05022	15.0612	0.988999	0.300784	2.11004	0.675068
Closed-Loop	Baseline	17.3925	18.3605	0.659104	0.104703	5.05022	15.0612	1.12921	0.395013	1.77785	0.652441
Closed-Loop	Baseline	17.3925	18.3605	0.659104	0.104703	5.05022	15.0612	0.925083	0.351153	2.25945	0.682909
Closed-Loop	Baseline	17.3925	18.3605	0.659104	0.104703	5.05022	15.0612	1.13155	0.382177	2.04542	0.649654
Closed-Loop	Baseline	17.3925	18.3605	0.659104	0.104703	5.05022	15.0612	1.02105	0.319556	2.08954	0.702391
Closed-Loop	Baseline	17.3925	18.3605	0.659104	0.104703	5.05022	15.0612	0.983958	0.358375	1.76522	0.67179
Closed-Loop	Baseline	17.3925	18.3605	0.659104	0.104703	5.05022	15.0612	1.25009	0.263802	2.21211	0.625298
Closed-Loop	Baseline	17.3925	18.3605	0.659104	0.104703	5.05022	15.0612	0.894436	0.267783	2.62541	0.762757
Closed-Loop	Baseline	17.3925	18.3605	0.659104	0.104703	5.05022	15.0612	0.964631	0.163043	1.69763	0.675116
Closed-Loop	Baseline	17.3925	18.3605	0.659104	0.104703	5.05022	15.0612	0.876757	0.359307	1.89807	0.636593
Closed-Loop	Baseline	17.3925	18.3605	0.659104	0.104703	5.05022	15.0612	1.09525	0.377016	2.06948	0.691587
Closed-Loop	Baseline	17.3925	18.3605	0.659104	0.104703	5.05022	15.0612	1.16892	0.272341	2.23592	0.703419
Closed-Loop	Baseline	17.3925	18.3605	0.659104	0.104703	5.05022	15.0612	1.16699	0.287302	1.83214	0.612677
Closed-Loop	Baseline	17.3925	18.3605	0.659104	0.104703	5.05022	15.0612	1.12239	0.262307	1.15009	0.716582
Closed-Loop	Baseline	17.3925	18.3605	0.659104	0.104703	5.05022	15.0612	0.980238	0.319133	2.40776	0.647642
Closed-Loop	Baseline	17.3925	18.3605	0.659104	0.104703	5.05022	15.0612	0.963476	0.356247	2.22815	0.785551
Closed-Loop	Baseline	17.3925	18.3605	0.659104	0.104703	5.05022	15.0612	0.832883	0.212861	1.47712	0.726198
Closed-Loop	Baseline	17.3925	18.3605	0.659104	0.104703	5.05022	15.0612	1.20359	0.320472	1.81773	0.680005
Closed-Loop	Baseline	17.3925	18.3605	0.659104	0.104703	5.05022	15.0612	1.0469	0.286166	2.47045	0.662742
Closed-Loop	Baseline	17.3925	18.3605	0.659104	0.104703	5.05022	15.0612	0.950804	0.30567	2.43434	0.694752
Closed-Loop	Baseline	17.3925	18.3605	0.659104	0.104703	5.05022	15.0612	1.13281	0.32295	2.28159	0.73064
Closed-Loop	Baseline	17.3925	18.3605	0.659104	0.104703	5.05022	15.0612	0.902724	0.29059	1.94717	0.698725
Closed-Loop	Baseline	17.3925	18.3605	0.659104	0.104703	5.05022	15.0612	1.04066	0.294821	2.0249	0.689142
Closed-Loop	Baseline	17.3925	18.3605	0.659104	0.104703	5.05022	15.0612	0.982737	0.289306	1.96072	0.702919
Closed-Loop	Baseline	17.3925	18.3605	0.659104	0.104703	5.05022	15.0612	1.06387	0.348516	2.33847	0.669807
Closed-Loop	Baseline	9.74516	16.9545	0.930965	0.0985285	10.1426	17.0048	0.951638	0.296821	2.12563	0.656208
Closed-Loop	Baseline	9.74516	16.9545	0.930965	0.0985285	10.1426	17.0048	1.08418	0.227454	2.06618	0.65971
Closed-Loop	Baseline	9.74516	16.9545	0.930965	0.0985285	10.1426	17.0048	0.894878	0.303779	1.61871	0.750514
Closed-Loop	Baseline	9.74516	16.9545	0.930965	0.0985285	10.1426	17.0048	0.746823	0.352443	1.88643	0.697782
Closed-Loop	Baseline	9.74516	16.9545	0.930965	0.0985285	10.1426	17.0048	0.977289	0.298539	2.2696	0.768923
Closed-Loop	Baseline	9.74516	16.9545	0.930965	0.0985285	10.1426	17.0048	0.985824	0.338756	2.01131	0.666424
Closed-Loop	Baseline	9.74516	16.9545	0.930965	0.0985285	10.1426	17.0048	1.01356	0.247724	2.19786	0.697261
Closed-Loop	Baseline	9.74516	16.9545	0.930965	0.0985285	10.1426	17.0048	1.07285	0.298687	2.52995	0.653879
Closed-Loop	Baseline	9.74516	16.9545	0.930965	0.0985285	10.1426	17.0048	1.06376	0.268774	2.31158	0.700368
Closed-Loop	Baseline	9.74516	16.9545	0.930965	0.0985285	10.1426	17.0048	1.02588	0.337349	2.02795	0.626073
Closed-Loop	Baseline	9.74516	16.9545	0.930965	0.0985285	10.1426	17.0048	1.11955	0.301575	1.8467	0.675618
Closed-Loop	Baseline	9.74516	16.9545	0.930965	0.0985285	10.1426	17.0048	0.848103	0.334504	1.23394	0.628187
Closed-Loop	Baseline	9.74516	16.9545	0.930965	0.0985285	10.1426	17.0048	1.05046	0.354386	1.94948	0.734696
Closed-Loop	Baseline	9.74516	16.9545	0.930965	0.0985285	10.1426	17.0048	1.06265	0.334581	1.9022	0.735829
Closed-Loop	Baseline	9.74516	16.9545	0.930965	0.0985285	10.1426	17.0048	0.876044	0.313656	2.11711	0.613487
Closed-Loop	Baseline	9.74516	16.9545	0.930965	0.0985285	10.1426	17.0048	0.849713	0.250089	1.95383	0.766694
Closed-Loop	Baseline	9.74516	16.9545	0.930965	0.0985285	10.1426	17.0048	0.925406	0.299861	1.90388	0.824871
Closed-Loop	Baseline	9.74516	16.9545	0.930965	0.0985285	10.1426	17.0048	0.933846	0.273345	1.46618	0.7023
Closed-Loop	Baseline	9.74516	16.9545	0.930965	0.0985285	10.1426	17.0048	1.07534	0.282797	1.71801	0.667944
Closed-Loop	Baseline	9.74516	16.9545	0.930965	0.0985285	10.1426	17.0048	0.938546	0.281273	2.143	0.841217
Closed-Loop	Baseline	9.74516	16.9545	0.930965	0.0985285	10.1426	17.0048	0.914365	0.251004	2.51477	0.634052
Closed-Loop	Baseline	9.74516	16.9545	0.930965	0.0985285	10.1426	17.0048	0.938837	0.202133	1.97074	0.701005
Closed-Loop	Baseline	9.74516	16.9545	0.930965	0.0985285	10.1426	17.0048	1.11186	0.266593	2.09834	0.708981
Closed-Loop	Baseline	9.74516	16.9545	0.930965	0.0985285	10.1426	17.0048	1.0013	0.309669	2.28574	0.767257
Closed-Loop	Baseline	9.74516	16.9545	0.930965	0.0985285	10.1426	17.0048	0.982075	0.232591	1.75673	0.717987
Closed-Loop	Baseline	9.74516	16.9545	0.930965	0.0985285	10.1426	17.0048	0.988999	0.300784	2.11004	0.675068
Closed-Loop	Baseline	9.74516	16.9545	0.930965	0.0985285	10.1426	17.0048	1.12921	0.395013	1.77785	0.652441
Closed-Loop	Baseline	9.74516	16.9545	0.930965	0.0985285	10.1426	17.0048	0.925083	0.351153	2.25945	0.682909
Closed-Loop	Baseline	9.74516	16.9545	0.930965	0.0985285	10.1426	17.0048	1.13155	0.382177	2.04542	0.649654
Closed-Loop	Baseline	9.74516	16.9545	0.930965	0.0985285	10.1426	17.0048	1.02105	0.319556	2.08954	0.702391
Closed-Loop	Baseline	9.74516	16.9545	0.930965	0.0985285	10.1426	17.0048	0.983958	0.358375	1.76522	0.67179
Closed-Loop	Baseline	9.74516	16.9545	0.930965	0.0985285	10.1426	17.0048	1.25009	0.263802	2.21211	0.625298
Closed-Loop	Baseline	9.74516	16.9545	0.930965	0.0985285	10.1426	17.0048	0.894436	0.267783	2.62541	0.762757
Closed-Loop	Baseline	9.74516	16.9545	0.930965	0.0985285	10.1426	17.0048	0.964631	0.163043	1.69763	0.675116
Closed-Loop	Baseline	9.74516	16.9545	0.930965	0.0985285	10.1426	17.0048	0.876757	0.359307	1.89807	0.636593
Closed-Loop	Baseline	9.74516	16.9545	0.930965	0.0985285	10.1426	17.0048	1.09525	0.377016	2.06948	0.691587
Closed-Loop	Baseline	9.74516	16.9545	0.930965	0.0985285	10.1426	17.0048	1.16892	0.272341	2.23592	0.703419
Closed-Loop	Baseline	9.74516	16.9545	0.930965	0.0985285	10.1426	17.0048	1.16699	0.287302	1.83214	0.612677
Closed-Loop	Baseline	9.74516	16.9545	0.930965	0.0985285	10.1426	17.0048	1.12239	0.262307	1.15009	0.716582
Closed-Loop	Baseline	9.74516	16.9545	0.930965	0.0985285	10.1426	17.0048	0.980238	0.319133	2.40776	0.647642
Closed-Loop	Baseline	9.74516	16.9545	0.930965	0.0985285	10.1426	17.0048	0.963476	0.356247	2.22815	0.785551
Closed-Loop	Baseline	9.74516	16.9545	0.930965	0.0985285	10.1426	17.0048	0.832883	0.212861	1.47712	0.726198
Closed-Loop	Baseline	9.74516	16.9545	0.930965	0.0985285	10.1426	17.0048	1.20359	0.320472	1.81773	0.680005
Closed-Loop	Baseline	9.74516	16.9545	0.930965	0.0985285	10.1426	17.0048	1.0469	0.286166	2.47045	0.662742
Closed-Loop	Baseline	9.74516	16.9545	0.930965	0.0985285	10.1426	17.0048	0.950804	0.30567	2.43434	0.694752
Closed-Loop	Baseline	9.74516	16.9545	0.930965	0.0985285	10.1426	17.0048	1.13281	0.32295	2.28159	0.73064
Closed-Loop	Baseline	9.74516	16.9545	0.930965	0.0985285	10.1426	17.0048	0.902724	0.29059	1.94717	0.698725
Closed-Loop	Baseline	9.74516	16.9545	0.930965	0.0985285	10.1426	17.0048	1.04066	0.294821	2.0249	0.689142
Closed-Loop	Baseline	9.74516	16.9545	0.930965	0.0985285	10.1426	17.0048	0.982737	0.289306	1.96072	0.702919
Closed-Loop	Baseline	9.74516	16.9545	0.930965	0.0985285	10.1426	17.0048	1.06387	0.348516	2.33847	0.669807
Closed-Loop	Baseline	23.092	5.93522	0.980553	0.101981	7.7617	14.9921	0.951638	0.296821	2.12563	0.656208
Closed-Loop	Baseline	23.092	5.93522	0.980553	0.101981	7.7617	14.9921	1.08418	0.227454	2.06618	0.65971
Closed-Loop	Baseline	23.092	5.93522	0.980553	0.101981	7.7617	14.9921	0.894878	0.303779	1.61871	0.750514
Closed-Loop	Baseline	23.092	5.93522	0.980553	0.101981	7.7617	14.9921	0.746823	0.352443	1.88643	0.697782
Closed-Loop	Baseline	23.092	5.93522	0.980553	0.101981	7.7617	14.9921	0.977289	0.298539	2.2696	0.768923
Closed-Loop	Baseline	23.092	5.93522	0.980553	0.101981	7.7617	14.9921	0.985824	0.338756	2.01131	0.666424
Closed-Loop	Baseline	23.092	5.93522	0.980553	0.101981	7.7617	14.9921	1.01356	0.247724	2.19786	0.697261
Closed-Loop	Baseline	23.092	5.93522	0.980553	0.101981	7.7617	14.9921	1.07285	0.298687	2.52995	0.653879
Closed-Loop	Baseline	23.092	5.93522	0.980553	0.101981	7.7617	14.9921	1.06376	0.268774	2.31158	0.700368
Closed-Loop	Baseline	23.092	5.93522	0.980553	0.101981	7.7617	14.9921	1.02588	0.337349	2.02795	0.626073
Closed-Loop	Baseline	23.092	5.93522	0.980553	0.101981	7.7617	14.9921	1.11955	0.301575	1.8467	0.675618
Closed-Loop	Baseline	23.092	5.93522	0.980553	0.101981	7.7617	14.9921	0.848103	0.334504	1.23394	0.628187
Closed-Loop	Baseline	23.092	5.93522	0.980553	0.101981	7.7617	14.9921	1.05046	0.354386	1.94948	0.734696
Closed-Loop	Baseline	23.092	5.93522	0.980553	0.101981	7.7617	14.9921	1.06265	0.334581	1.9022	0.735829
Closed-Loop	Baseline	23.092	5.93522	0.980553	0.101981	7.7617	14.9921	0.876044	0.313656	2.11711	0.613487
Closed-Loop	Baseline	23.092	5.93522	0.980553	0.101981	7.7617	14.9921	0.849713	0.250089	1.95383	0.766694
Closed-Loop	Baseline	23.092	5.93522	0.980553	0.101981	7.7617	14.9921	0.925406	0.299861	1.90388	0.824871
Closed-Loop	Baseline	23.092	5.93522	0.980553	0.101981	7.7617	14.9921	0.933846	0.273345	1.46618	0.7023
Closed-Loop	Baseline	23.092	5.93522	0.980553	0.101981	7.7617	14.9921	1.07534	0.282797	1.71801	0.667944
Closed-Loop	Baseline	23.092	5.93522	0.980553	0.101981	7.7617	14.9921	0.938546	0.281273	2.143	0.841217
Closed-Loop	Baseline	23.092	5.93522	0.980553	0.101981	7.7617	14.9921	0.914365	0.251004	2.51477	0.634052
Closed-Loop	Baseline	23.092	5.93522	0.980553	0.101981	7.7617	14.9921	0.938837	0.202133	1.97074	0.701005
Closed-Loop	Baseline	23.092	5.93522	0.980553	0.101981	7.7617	14.9921	1.11186	0.266593	2.09834	0.708981
Closed-Loop	Baseline	23.092	5.93522	0.980553	0.101981	7.7617	14.9921	1.0013	0.309669	2.28574	0.767257
Closed-Loop	Baseline	23.092	5.93522	0.980553	0.101981	7.7617	14.9921	0.982075	0.232591	1.75673	0.717987
Closed-Loop	Baseline	23.092	5.93522	0.980553	0.101981	7.7617	14.9921	0.988999	0.300784	2.11004	0.675068
Closed-Loop	Baseline	23.092	5.93522	0.980553	0.101981	7.7617	14.9921	1.12921	0.395013	1.77785	0.652441
Closed-Loop	Baseline	23.092	5.93522	0.980553	0.101981	7.7617	14.9921	0.925083	0.351153	2.25945	0.682909
Closed-Loop	Baseline	23.092	5.93522	0.980553	0.101981	7.7617	14.9921	1.13155	0.382177	2.04542	0.649654
Closed-Loop	Baseline	23.092	5.93522	0.980553	0.101981	7.7617	14.9921	1.02105	0.319556	2.08954	0.702391
Closed-Loop	Baseline	23.092	5.93522	0.980553	0.101981	7.7617	14.9921	0.983958	0.358375	1.76522	0.67179
Closed-Loop	Baseline	23.092	5.93522	0.980553	0.101981	7.7617	14.9921	1.25009	0.263802	2.21211	0.625298
Closed-Loop	Baseline	23.092	5.93522	0.980553	0.101981	7.7617	14.9921	0.894436	0.267783	2.62541	0.762757
Closed-Loop	Baseline	23.092	5.93522	0.980553	0.101981	7.7617	14.9921	0.964631	0.163043	1.69763	0.675116
Closed-Loop	Baseline	23.092	5.93522	0.980553	0.101981	7.7617	14.9921	0.876757	0.359307	1.89807	0.636593
Closed-Loop	Baseline	23.092	5.93522	0.980553	0.101981	7.7617	14.9921	1.09525	0.377016	2.06948	0.691587
Closed-Loop	Baseline	23.092	5.93522	0.980553	0.101981	7.7617	14.9921	1.16892	0.272341	2.23592	0.703419
Closed-Loop	Baseline	23.092	5.93522	0.980553	0.101981	7.7617	14.9921	1.16699	0.287302	1.83214	0.612677
Closed-Loop	Baseline	23.092	5.93522	0.980553	0.101981	7.7617	14.9921	1.12239	0.262307	1.15009	0.716582
Closed-Loop	Baseline	23.092	5.93522	0.980553	0.101981	7.7617	14.9921	0.980238	0.319133	2.40776	0.647642
Closed-Loop	Baseline	23.092	5.93522	0.980553	0.101981	7.7617	14.9921	0.963476	0.356247	2.22815	0.785551
Closed-Loop	Baseline	23.092	5.93522	0.980553	0.101981	7.7617	14.9921	0.832883	0.212861	1.47712	0.726198
Closed-Loop	Baseline	23.092	5.93522	0.980553	0.101981	7.7617	14.9921	1.20359	0.320472	1.81773	0.680005
Closed-Loop	Baseline	23.092	5.93522	0.980553	0.101981	7.7617	14.9921	1.0469	0.286166	2.47045	0.662742
Closed-Loop	Baseline	23.092	5.93522	0.980553	0.101981	7.7617	14.9921	0.950804	0.30567	2.43434	0.694752
Closed-Loop	Baseline	23.092	5.93522	0.980553	0.101981	7.7617	14.9921	1.13281	0.32295	2.28159	0.73064
Closed-Loop	Baseline	23.092	5.93522	0.980553	0.101981	7.7617	14.9921	0.902724	0.29059	1.94717	0.698725
Closed-Loop	Baseline	23.092	5.93522	0.980553	0.101981	7.7617	14.9921	1.04066	0.294821	2.0249	0.689142
Closed-Loop	Baseline	23.092	5.93522	0.980553	0.101981	7.7617	14.9921	0.982737	0.289306	1.96072	0.702919
Closed-Loop	Baseline	23.092	5.93522	0.980553	0.101981	7.7617	14.9921	1.06387	0.348516	2.33847	0.669807
Closed-Loop	Baseline	15.3805	16.6298	1.12699	0.0825732	5.85641	12.8074	0.951638	0.296821	2.12563	0.656208
Closed-Loop	Baseline	15.3805	16.6298	1.12699	0.0825732	5.85641	12.8074	1.08418	0.227454	2.06618	0.65971
Closed-Loop	Baseline	15.3805	16.6298	1.12699	0.0825732	5.85641	12.8074	0.894878	0.303779	1.61871	0.750514
Closed-Loop	Baseline	15.3805	16.6298	1.12699	0.0825732	5.85641	12.8074	0.746823	0.352443	1.88643	0.697782
Closed-Loop	Baseline	15.3805	16.6298	1.12699	0.0825732	5.85641	12.8074	0.977289	0.298539	2.2696	0.768923
Closed-Loop	Baseline	15.3805	16.6298	1.12699	0.0825732	5.85641	12.8074	0.985824	0.338756	2.01131	0.666424
Closed-Loop	Baseline	15.3805	16.6298	1.12699	0.0825732	5.85641	12.8074	1.01356	0.247724	2.19786	0.697261
Closed-Loop	Baseline	15.3805	16.6298	1.12699	0.0825732	5.85641	12.8074	1.07285	0.298687	2.52995	0.653879
Closed-Loop	Baseline	15.3805	16.6298	1.12699	0.0825732	5.85641	12.8074	1.06376	0.268774	2.31158	0.700368
Closed-Loop	Baseline	15.3805	16.6298	1.12699	0.0825732	5.85641	12.8074	1.02588	0.337349	2.02795	0.626073
Closed-Loop	Baseline	15.3805	16.6298	1.12699	0.0825732	5.85641	12.8074	1.11955	0.301575	1.8467	0.675618
Closed-Loop	Baseline	15.3805	16.6298	1.12699	0.0825732	5.85641	12.8074	0.848103	0.334504	1.23394	0.628187
Closed-Loop	Baseline	15.3805	16.6298	1.12699	0.0825732	5.85641	12.8074	1.05046	0.354386	1.94948	0.734696
Closed-Loop	Baseline	15.3805	16.6298	1.12699	0.0825732	5.85641	12.8074	1.06265	0.334581	1.9022	0.735829
Closed-Loop	Baseline	15.3805	16.6298	1.12699	0.0825732	5.85641	12.8074	0.876044	0.313656	2.11711	0.613487
Closed-Loop	Baseline	15.3805	16.6298	1.12699	0.0825732	5.85641	12.8074	0.849713	0.250089	1.95383	0.766694
Closed-Loop	Baseline	15.3805	16.6298	1.12699	0.0825732	5.85641	12.8074	0.925406	0.299861	1.90388	0.824871
Closed-Loop	Baseline	15.3805	16.6298	1.12699	0.0825732	5.85641	12.8074	0.933846	0.273345	1.46618	0.7023
Closed-Loop	Baseline	15.3805	16.6298	1.12699	0.0825732	5.85641	12.8074	1.07534	0.282797	1.71801	0.667944
Closed-Loop	Baseline	15.3805	16.6298	1.12699	0.0825732	5.85641	12.8074	0.938546	0.281273	2.143	0.841217
Closed-Loop	Baseline	15.3805	16.6298	1.12699	0.0825732	5.85641	12.8074	0.914365	0.251004	2.51477	0.634052
Closed-Loop	Baseline	15.3805	16.6298	1.12699	0.0825732	5.85641	12.8074	0.938837	0.202133	1.97074	0.701005
Closed-Loop	Baseline	15.3805	16.6298	1.12699	0.0825732	5.85641	12.8074	1.11186	0.266593	2.09834	0.708981
Closed-Loop	Baseline	15.3805	16.6298	1.12699	0.0825732	5.85641	12.8074	1.0013	0.309669	2.28574	0.767257
Closed-Loop	Baseline	15.3805	16.6298	1.12699	0.0825732	5.85641	12.8074	0.982075	0.232591	1.75673	0.717987
Closed-Loop	Baseline	15.3805	16.6298	1.12699	0.0825732	5.85641	12.8074	0.988999	0.300784	2.11004	0.675068
Closed-Loop	Baseline	15.3805	16.6298	1.12699	0.0825732	5.85641	12.8074	1.12921	0.395013	1.77785	0.652441
Closed-Loop	Baseline	15.3805	16.6298	1.12699	0.0825732	5.85641	12.8074	0.925083	0.351153	2.25945	0.682909
Closed-Loop	Baseline	15.3805	16.6298	1.12699	0.0825732	5.85641	12.8074	1.13155	0.382177	2.04542	0.649654
Closed-Loop	Baseline	15.3805	16.6298	1.12699	0.0825732	5.85641	12.8074	1.02105	0.319556	2.08954	0.702391
Closed-Loop	Baseline	15.3805	16.6298	1.12699	0.0825732	5.85641	12.8074	0.983958	0.358375	1.76522	0.67179
Closed-Loop	Baseline	15.3805	16.6298	1.12699	0.0825732	5.85641	12.8074	1.25009	0.263802	2.21211	0.625298
Closed-Loop	Baseline	15.3805	16.6298	1.12699	0.0825732	5.85641	12.8074	0.894436	0.267783	2.62541	0.762757
Closed-Loop	Baseline	15.3805	16.6298	1.12699	0.0825732	5.85641	12.8074	0.964631	0.163043	1.69763	0.675116
Closed-Loop	Baseline	15.3805	16.6298	1.12699	0.0825732	5.85641	12.8074	0.876757	0.359307	1.89807	0.636593
Closed-Loop	Baseline	15.3805	16.6298	1.12699	0.0825732	5.85641	12.8074	1.09525	0.377016	2.06948	0.691587
Closed-Loop	Baseline	15.3805	16.6298	1.12699	0.0825732	5.85641	12.8074	1.16892	0.272341	2.23592	0.703419
Closed-Loop	Baseline	15.3805	16.6298	1.12699	0.0825732	5.85641	12.8074	1.16699	0.287302	1.83214	0.612677
Closed-Loop	Baseline	15.3805	16.6298	1.12699	0.0825732	5.85641	12.8074	1.12239	0.262307	1.15009	0.716582
Closed-Loop	Baseline	15.3805	16.6298	1.12699	0.0825732	5.85641	12.8074	0.980238	0.319133	2.40776	0.647642
Closed-Loop	Baseline	15.3805	16.6298	1.12699	0.0825732	5.85641	12.8074	0.963476	0.356247	2.22815	0.785551
Closed-Loop	Baseline	15.3805	16.6298	1.12699	0.0825732	5.85641	12.8074	0.832883	0.212861	1.47712	0.726198
Closed-Loop	Baseline	15.3805	16.6298	1.12699	0.0825732	5.85641	12.8074	1.20359	0.320472	1.81773	0.680005
Closed-Loop	Baseline	15.3805	16.6298	1.12699	0.0825732	5.85641	12.8074	1.0469	0.286166	2.47045	0.662742
Closed-Loop	Baseline	15.3805	16.6298	1.12699	0.0825732	5.85641	12.8074	0.950804	0.30567	2.43434	0.694752
Closed-Loop	Baseline	15.3805	16.6298	1.12699	0.0825732	5.85641	12.8074	1.13281	0.32295	2.28159	0.73064
Closed-Loop	Baseline	15.3805	16.6298	1.12699	0.0825732	5.85641	12.8074	0.902724	0.29059	1.94717	0.698725
Closed-Loop	Baseline	15.3805	16.6298	1.12699	0.0825732	5.85641	12.8074	1.04066	0.294821	2.0249	0.689142
Closed-Loop	Baseline	15.3805	16.6298	1.12699	0.0825732	5.85641	12.8074	0.982737	0.289306	1.96072	0.702919
Closed-Loop	Baseline	15.3805	16.6298	1.12699	0.0825732	5.85641	12.8074	1.06387	0.348516	2.33847	0.669807
Closed-Loop	Baseline	21.015	15.6013	0.787402	0.0864552	5.58393	13.6889	0.951638	0.296821	2.12563	0.656208
Closed-Loop	Baseline	21.015	15.6013	0.787402	0.0864552	5.58393	13.6889	1.08418	0.227454	2.06618	0.65971
Closed-Loop	Baseline	21.015	15.6013	0.787402	0.0864552	5.58393	13.6889	0.894878	0.303779	1.61871	0.750514
Closed-Loop	Baseline	21.015	15.6013	0.787402	0.0864552	5.58393	13.6889	0.746823	0.352443	1.88643	0.697782
Closed-Loop	Baseline	21.015	15.6013	0.787402	0.0864552	5.58393	13.6889	0.977289	0.298539	2.2696	0.768923
Closed-Loop	Baseline	21.015	15.6013	0.787402	0.0864552	5.58393	13.6889	0.985824	0.338756	2.01131	0.666424
Closed-Loop	Baseline	21.015	15.6013	0.787402	0.0864552	5.58393	13.6889	1.01356	0.247724	2.19786	0.697261
Closed-Loop	Baseline	21.015	15.6013	0.787402	0.0864552	5.58393	13.6889	1.07285	0.298687	2.52995	0.653879
Closed-Loop	Baseline	21.015	15.6013	0.787402	0.0864552	5.58393	13.6889	1.06376	0.268774	2.31158	0.700368
Closed-Loop	Baseline	21.015	15.6013	0.787402	0.0864552	5.58393	13.6889	1.02588	0.337349	2.02795	0.626073
Closed-Loop	Baseline	21.015	15.6013	0.787402	0.0864552	5.58393	13.6889	1.11955	0.301575	1.8467	0.675618
Closed-Loop	Baseline	21.015	15.6013	0.787402	0.0864552	5.58393	13.6889	0.848103	0.334504	1.23394	0.628187
Closed-Loop	Baseline	21.015	15.6013	0.787402	0.0864552	5.58393	13.6889	1.05046	0.354386	1.94948	0.734696
Closed-Loop	Baseline	21.015	15.6013	0.787402	0.0864552	5.58393	13.6889	1.06265	0.334581	1.9022	0.735829
Closed-Loop	Baseline	21.015	15.6013	0.787402	0.0864552	5.58393	13.6889	0.876044	0.313656	2.11711	0.613487
Closed-Loop	Baseline	21.015	15.6013	0.787402	0.0864552	5.58393	13.6889	0.849713	0.250089	1.95383	0.766694
Closed-Loop	Baseline	21.015	15.6013	0.787402	0.0864552	5.58393	13.6889	0.925406	0.299861	1.90388	0.824871
Closed-Loop	Baseline	21.015	15.6013	0.787402	0.0864552	5.58393	13.6889	0.933846	0.273345	1.46618	0.7023
Closed-Loop	Baseline	21.015	15.6013	0.787402	0.0864552	5.58393	13.6889	1.07534	0.282797	1.71801	0.667944
Closed-Loop	Baseline	21.015	15.6013	0.787402	0.0864552	5.58393	13.6889	0.938546	0.281273	2.143	0.841217
Closed-Loop	Baseline	21.015	15.6013	0.787402	0.0864552	5.58393	13.6889	0.914365	0.251004	2.51477	0.634052
Closed-Loop	Baseline	21.015	15.6013	0.787402	0.0864552	5.58393	13.6889	0.938837	0.202133	1.97074	0.701005
Closed-Loop	Baseline	21.015	15.6013	0.787402	0.0864552	5.58393	13.6889	1.11186	0.266593	2.09834	0.708981
Closed-Loop	Baseline	21.015	15.6013	0.787402	0.0864552	5.58393	13.6889	1.0013	0.309669	2.28574	0.767257
Closed-Loop	Baseline	21.015	15.6013	0.787402	0.0864552	5.58393	13.6889	0.982075	0.232591	1.75673	0.717987
Closed-Loop	Baseline	21.015	15.6013	0.787402	0.0864552	5.58393	13.6889	0.988999	0.300784	2.11004	0.675068
Closed-Loop	Baseline	21.015	15.6013	0.787402	0.0864552	5.58393	13.6889	1.12921	0.395013	1.77785	0.652441
Closed-Loop	Baseline	21.015	15.6013	0.787402	0.0864552	5.58393	13.6889	0.925083	0.351153	2.25945	0.682909
Closed-Loop	Baseline	21.015	15.6013	0.787402	0.0864552	5.58393	13.6889	1.13155	0.382177	2.04542	0.649654
Closed-Loop	Baseline	21.015	15.6013	0.787402	0.0864552	5.58393	13.6889	1.02105	0.319556	2.08954	0.702391
Closed-Loop	Baseline	21.015	15.6013	0.787402	0.0864552	5.58393	13.6889	0.983958	0.358375	1.76522	0.67179
Closed-Loop	Baseline	21.015	15.6013	0.787402	0.0864552	5.58393	13.6889	1.25009	0.263802	2.21211	0.625298
Closed-Loop	Baseline	21.015	15.6013	0.787402	0.0864552	5.58393	13.6889	0.894436	0.267783	2.62541	0.762757
Closed-Loop	Baseline	21.015	15.6013	0.787402	0.0864552	5.58393	13.6889	0.964631	0.163043	1.69763	0.675116
Closed-Loop	Baseline	21.015	15.6013	0.787402	0.0864552	5.58393	13.6889	0.876757	0.359307	1.89807	0.636593
Closed-Loop	Baseline	21.015	15.6013	0.787402	0.0864552	5.58393	13.6889	1.09525	0.377016	2.06948	0.691587
Closed-Loop	Baseline	21.015	15.6013	0.787402	0.0864552	5.58393	13.6889	1.16892	0.272341	2.23592	0.703419
Closed-Loop	Baseline	21.015	15.6013	0.787402	0.0864552	5.58393	13.6889	1.16699	0.287302	1.83214	0.612677
Closed-Loop	Baseline	21.015	15.6013	0.787402	0.0864552	5.58393	13.6889	1.12239	0.262307	1.15009	0.716582
Closed-Loop	Baseline	21.015	15.6013	0.787402	0.0864552	5.58393	13.6889	0.980238	0.319133	2.40776	0.647642
Closed-Loop	Baseline	21.015	15.6013	0.787402	0.0864552	5.58393	13.6889	0.963476	0.356247	2.22815	0.785551
Closed-Loop	Baseline	21.015	15.6013	0.787402	0.0864552	5.58393	13.6889	0.832883	0.212861	1.47712	0.726198
Closed-Loop	Baseline	21.015	15.6013	0.787402	0.0864552	5.58393	13.6889	1.20359	0.320472	1.81773	0.680005
Closed-Loop	Baseline	21.015	15.6013	0.787402	0.0864552	5.58393	13.6889	1.0469	0.286166	2.47045	0.662742
Closed-Loop	Baseline	21.015	15.6013	0.787402	0.0864552	5.58393	13.6889	0.950804	0.30567	2.43434	0.694752
Closed-Loop	Baseline	21.015	15.6013	0.787402	0.0864552	5.58393	13.6889	1.13281	0.32295	2.28159	0.73064
Closed-Loop	Baseline	21.015	15.6013	0.787402	0.0864552	5.58393	13.6889	0.902724	0.29059	1.94717	0.698725
Closed-Loop	Baseline	21.015	15.6013	0.787402	0.0864552	5.58393	13.6889	1.04066	0.294821	2.0249	0.689142
Closed-Loop	Baseline	21.015	15.6013	0.787402	0.0864552	5.58393	13.6889	0.982737	0.289306	1.96072	0.702919
Closed-Loop	Baseline	21.015	15.6013	0.787402	0.0864552	5.58393	13.6889	1.06387	0.348516	2.33847	0.669807
Closed-Loop	Baseline	29.721	14.4003	0.446793	0.073234	5.26815	12.0641	0.951638	0.296821	2.12563	0.656208
Closed-Loop	Baseline	29.721	14.4003	0.446793	0.073234	5.26815	12.0641	1.08418	0.227454	2.06618	0.65971
Closed-Loop	Baseline	29.721	14.4003	0.446793	0.073234	5.26815	12.0641	0.894878	0.303779	1.61871	0.750514
Closed-Loop	Baseline	29.721	14.4003	0.446793	0.073234	5.26815	12.0641	0.746823	0.352443	1.88643	0.697782
Closed-Loop	Baseline	29.721	14.4003	0.446793	0.073234	5.26815	12.0641	0.977289	0.298539	2.2696	0.768923
Closed-Loop	Baseline	29.721	14.4003	0.446793	0.073234	5.26815	12.0641	0.985824	0.338756	2.01131	0.666424
Closed-Loop	Baseline	29.721	14.4003	0.446793	0.073234	5.26815	12.0641	1.01356	0.247724	2.19786	0.697261
Closed-Loop	Baseline	29.721	14.4003	0.446793	0.073234	5.26815	12.0641	1.07285	0.298687	2.52995	0.653879
Closed-Loop	Baseline	29.721	14.4003	0.446793	0.073234	5.26815	12.0641	1.06376	0.268774	2.31158	0.700368
Closed-Loop	Baseline	29.721	14.4003	0.446793	0.073234	5.26815	12.0641	1.02588	0.337349	2.02795	0.626073
Closed-Loop	Baseline	29.721	14.4003	0.446793	0.073234	5.26815	12.0641	1.11955	0.301575	1.8467	0.675618
Closed-Loop	Baseline	29.721	14.4003	0.446793	0.073234	5.26815	12.0641	0.848103	0.334504	1.23394	0.628187
Closed-Loop	Baseline	29.721	14.4003	0.446793	0.073234	5.26815	12.0641	1.05046	0.354386	1.94948	0.734696
Closed-Loop	Baseline	29.721	14.4003	0.446793	0.073234	5.26815	12.0641	1.06265	0.334581	1.9022	0.735829
Closed-Loop	Baseline	29.721	14.4003	0.446793	0.073234	5.26815	12.0641	0.876044	0.313656	2.11711	0.613487
Closed-Loop	Baseline	29.721	14.4003	0.446793	0.073234	5.26815	12.0641	0.849713	0.250089	1.95383	0.766694
Closed-Loop	Baseline	29.721	14.4003	0.446793	0.073234	5.26815	12.0641	0.925406	0.299861	1.90388	0.824871
Closed-Loop	Baseline	29.721	14.4003	0.446793	0.073234	5.26815	12.0641	0.933846	0.273345	1.46618	0.7023
Closed-Loop	Baseline	29.721	14.4003	0.446793	0.073234	5.26815	12.0641	1.07534	0.282797	1.71801	0.667944
Closed-Loop	Baseline	29.721	14.4003	0.446793	0.073234	5.26815	12.0641	0.938546	0.281273	2.143	0.841217
Closed-Loop	Baseline	29.721	14.4003	0.446793	0.073234	5.26815	12.0641	0.914365	0.251004	2.51477	0.634052
Closed-Loop	Baseline	29.721	14.4003	0.446793	0.073234	5.26815	12.0641	0.938837	0.202133	1.97074	0.701005
Closed-Loop	Baseline	29.721	14.4003	0.446793	0.073234	5.26815	12.0641	1.11186	0.266593	2.09834	0.708981
Closed-Loop	Baseline	29.721	14.4003	0.446793	0.073234	5.26815	12.0641	1.0013	0.309669	2.28574	0.767257
Closed-Loop	Baseline	29.721	14.4003	0.446793	0.073234	5.26815	12.0641	0.982075	0.232591	1.75673	0.717987
Closed-Loop	Baseline	29.721	14.4003	0.446793	0.073234	5.26815	12.0641	0.988999	0.300784	2.11004	0.675068
Closed-Loop	Baseline	29.721	14.4003	0.446793	0.073234	5.26815	12.0641	1.12921	0.395013	1.77785	0.652441
Closed-Loop	Baseline	29.721	14.4003	0.446793	0.073234	5.26815	12.0641	0.925083	0.351153	2.25945	0.682909
Closed-Loop	Baseline	29.721	14.4003	0.446793	0.073234	5.26815	12.0641	1.13155	0.382177	2.04542	0.649654
Closed-Loop	Baseline	29.721	14.4003	0.446793	0.073234	5.26815	12.0641	1.02105	0.319556	2.08954	0.702391
Closed-Loop	Baseline	29.721	14.4003	0.446793	0.073234	5.26815	12.0641	0.983958	0.358375	1.76522	0.67179
Closed-Loop	Baseline	29.721	14.4003	0.446793	0.073234	5.26815	12.0641	1.25009	0.263802	2.21211	0.625298
Closed-Loop	Baseline	29.721	14.4003	0.446793	0.073234	5.26815	12.0641	0.894436	0.267783	2.62541	0.762757
Closed-Loop	Baseline	29.721	14.4003	0.446793	0.073234	5.26815	12.0641	0.964631	0.163043	1.69763	0.675116
Closed-Loop	Baseline	29.721	14.4003	0.446793	0.073234	5.26815	12.0641	0.876757	0.359307	1.89807	0.636593
Closed-Loop	Baseline	29.721	14.4003	0.446793	0.073234	5.26815	12.0641	1.09525	0.377016	2.06948	0.691587
Closed-Loop	Baseline	29.721	14.4003	0.446793	0.073234	5.26815	12.0641	1.16892	0.272341	2.23592	0.703419
Closed-Loop	Baseline	29.721	14.4003	0.446793	0.073234	5.26815	12.0641	1.16699	0.287302	1.83214	0.612677
Closed-Loop	Baseline	29.721	14.4003	0.446793	0.073234	5.26815	12.0641	1.12239	0.262307	1.15009	0.716582
Closed-Loop	Baseline	29.721	14.4003	0.446793	0.073234	5.26815	12.0641	0.980238	0.319133	2.40776	0.647642
Closed-Loop	Baseline	29.721	14.4003	0.446793	0.073234	5.26815	12.0641	0.963476	0.356247	2.22815	0.785551
Closed-Loop	Baseline	29.721	14.4003	0.446793	0.073234	5.26815	12.0641	0.832883	0.212861	1.47712	0.726198
Closed-Loop	Baseline	29.721	14.4003	0.446793	0.073234	5.26815	12.0641	1.20359	0.320472	1.81773	0.680005
Closed-Loop	Baseline	29.721	14.4003	0.446793	0.073234	5.26815	12.0641	1.0469	0.286166	2.47045	0.662742
Closed-Loop	Baseline	29.721	14.4003	0.446793	0.073234	5.26815	12.0641	0.950804	0.30567	2.43434	0.694752
Closed-Loop	Baseline	29.721	14.4003	0.446793	0.073234	5.26815	12.0641	1.13281	0.32295	2.28159	0.73064
Closed-Loop	Baseline	29.721	14.4003	0.446793	0.073234	5.26815	12.0641	0.902724	0.29059	1.94717	0.698725
Closed-Loop	Baseline	29.721	14.4003	0.446793	0.073234	5.26815	12.0641	1.04066	0.294821	2.0249	0.689142
Closed-Loop	Baseline	29.721	14.4003	0.446793	0.073234	5.26815	12.0641	0.982737	0.289306	1.96072	0.702919
Closed-Loop	Baseline	29.721	14.4003	0.446793	0.073234	5.26815	12.0641	1.06387	0.348516	2.33847	0.669807
Closed-Loop	Baseline	16.7244	13.2915	0.961015	0.080921	7.07781	19.5846	0.951638	0.296821	2.12563	0.656208
Closed-Loop	Baseline	16.7244	13.2915	0.961015	0.080921	7.07781	19.5846	1.08418	0.227454	2.06618	0.65971
Closed-Loop	Baseline	16.7244	13.2915	0.961015	0.080921	7.07781	19.5846	0.894878	0.303779	1.61871	0.750514
Closed-Loop	Baseline	16.7244	13.2915	0.961015	0.080921	7.07781	19.5846	0.746823	0.352443	1.88643	0.697782
Closed-Loop	Baseline	16.7244	13.2915	0.961015	0.080921	7.07781	19.5846	0.977289	0.298539	2.2696	0.768923
Closed-Loop	Baseline	16.7244	13.2915	0.961015	0.080921	7.07781	19.5846	0.985824	0.338756	2.01131	0.666424
Closed-Loop	Baseline	16.7244	13.2915	0.961015	0.080921	7.07781	19.5846	1.01356	0.247724	2.19786	0.697261
Closed-Loop	Baseline	16.7244	13.2915	0.961015	0.080921	7.07781	19.5846	1.07285	0.298687	2.52995	0.653879
Closed-Loop	Baseline	16.7244	13.2915	0.961015	0.080921	7.07781	19.5846	1.06376	0.268774	2.31158	0.700368
Closed-Loop	Baseline	16.7244	13.2915	0.961015	0.080921	7.07781	19.5846	1.02588	0.337349	2.02795	0.626073
Closed-Loop	Baseline	16.7244	13.2915	0.961015	0.080921	7.07781	19.5846	1.11955	0.301575	1.8467	0.675618
Closed-Loop	Baseline	16.7244	13.2915	0.961015	0.080921	7.07781	19.5846	0.848103	0.334504	1.23394	0.628187
Closed-Loop	Baseline	16.7244	13.2915	0.961015	0.080921	7.07781	19.5846	1.05046	0.354386	1.94948	0.734696
Closed-Loop	Baseline	16.7244	13.2915	0.961015	0.080921	7.07781	19.5846	1.06265	0.334581	1.9022	0.735829
Closed-Loop	Baseline	16.7244	13.2915	0.961015	0.080921	7.07781	19.5846	0.876044	0.313656	2.11711	0.613487
Closed-Loop	Baseline	16.7244	13.2915	0.961015	0.080921	7.07781	19.5846	0.849713	0.250089	1.95383	0.766694
Closed-Loop	Baseline	16.7244	13.2915	0.961015	0.080921	7.07781	19.5846	0.925406	0.299861	1.90388	0.824871
Closed-Loop	Baseline	16.7244	13.2915	0.961015	0.080921	7.07781	19.5846	0.933846	0.273345	1.46618	0.7023
Closed-Loop	Baseline	16.7244	13.2915	0.961015	0.080921	7.07781	19.5846	1.07534	0.282797	1.71801	0.667944
Closed-Loop	Baseline	16.7244	13.2915	0.961015	0.080921	7.07781	19.5846	0.938546	0.281273	2.143	0.841217
Closed-Loop	Baseline	16.7244	13.2915	0.961015	0.080921	7.07781	19.5846	0.914365	0.251004	2.51477	0.634052
Closed-Loop	Baseline	16.7244	13.2915	0.961015	0.080921	7.07781	19.5846	0.938837	0.202133	1.97074	0.701005
Closed-Loop	Baseline	16.7244	13.2915	0.961015	0.080921	7.07781	19.5846	1.11186	0.266593	2.09834	0.708981
Closed-Loop	Baseline	16.7244	13.2915	0.961015	0.080921	7.07781	19.5846	1.0013	0.309669	2.28574	0.767257
Closed-Loop	Baseline	16.7244	13.2915	0.961015	0.080921	7.07781	19.5846	0.982075	0.232591	1.75673	0.717987
Closed-Loop	Baseline	16.7244	13.2915	0.961015	0.080921	7.07781	19.5846	0.988999	0.300784	2.11004	0.675068
Closed-Loop	Baseline	16.7244	13.2915	0.961015	0.080921	7.07781	19.5846	1.12921	0.395013	1.77785	0.652441
Closed-Loop	Baseline	16.7244	13.2915	0.961015	0.080921	7.07781	19.5846	0.925083	0.351153	2.25945	0.682909
Closed-Loop	Baseline	16.7244	13.2915	0.961015	0.080921	7.07781	19.5846	1.13155	0.382177	2.04542	0.649654
Closed-Loop	Baseline	16.7244	13.2915	0.961015	0.080921	7.07781	19.5846	1.02105	0.319556	2.08954	0.702391
Closed-Loop	Baseline	16.7244	13.2915	0.961015	0.080921	7.07781	19.5846	0.983958	0.358375	1.76522	0.67179
Closed-Loop	Baseline	16.7244	13.2915	0.961015	0.080921	7.07781	19.5846	1.25009	0.263802	2.21211	0.625298
Closed-Loop	Baseline	16.7244	13.2915	0.961015	0.080921	7.07781	19.5846	0.894436	0.267783	2.62541	0.762757
Closed-Loop	Baseline	16.7244	13.2915	0.961015	0.080921	7.07781	19.5846	0.964631	0.163043	1.69763	0.675116
Closed-Loop	Baseline	16.7244	13.2915	0.961015	0.080921	7.07781	19.5846	0.876757	0.359307	1.89807	0.636593
Closed-Loop	Baseline	16.7244	13.2915	0.961015	0.080921	7.07781	19.5846	1.09525	0.377016	2.06948	0.691587
Closed-Loop	Baseline	16.7244	13.2915	0.961015	0.080921	7.07781	19.5846	1.16892	0.272341	2.23592	0.703419
Closed-Loop	Baseline	16.7244	13.2915	0.961015	0.080921	7.07781	19.5846	1.16699	0.287302	1.83214	0.612677
Closed-Loop	Baseline	16.7244	13.2915	0.961015	0.080921	7.07781	19.5846	1.12239	0.262307	1.15009	0.716582
Closed-Loop	Baseline	16.7244	13.2915	0.961015	0.080921	7.07781	19.5846	0.980238	0.319133	2.40776	0.647642
Closed-Loop	Baseline	16.7244	13.2915	0.961015	0.080921	7.07781	19.5846	0.963476	0.356247	2.22815	0.785551
Closed-Loop	Baseline	16.7244	13.2915	0.961015	0.080921	7.07781	19.5846	0.832883	0.212861	1.47712	0.726198
Closed-Loop	Baseline	16.7244	13.2915	0.961015	0.080921	7.07781	19.5846	1.20359	0.320472	1.81773	0.680005
Closed-Loop	Baseline	16.7244	13.2915	0.961015	0.080921	7.07781	19.5846	1.0469	0.286166	2.47045	0.662742
Closed-Loop	Baseline	16.7244	13.2915	0.961015	0.080921	7.07781	19.5846	0.950804	0.30567	2.43434	0.694752
Closed-Loop	Baseline	16.7244	13.2915	0.961015	0.080921	7.07781	19.5846	1.13281	0.32295	2.28159	0.73064
Closed-Loop	Baseline	16.7244	13.2915	0.961015	0.080921	7.07781	19.5846	0.902724	0.29059	1.94717	0.698725
Closed-Loop	Baseline	16.7244	13.2915	0.961015	0.080921	7.07781	19.5846	1.04066	0.294821	2.0249	0.689142
Closed-Loop	Baseline	16.7244	13.2915	0.961015	0.080921	7.07781	19.5846	0.982737	0.289306	1.96072	0.702919
Closed-Loop	Baseline	16.7244	13.2915	0.961015	0.080921	7.07781	19.5846	1.06387	0.348516	2.33847	0.669807
Closed-Loop	Baseline	8.76817	18.712	1.11549	0.0905166	4.51481	9.86541	0.951638	0.296821	2.12563	0.656208
Closed-Loop	Baseline	8.76817	18.712	1.11549	0.0905166	4.51481	9.86541	1.08418	0.227454	2.06618	0.65971
Closed-Loop	Baseline	8.76817	18.712	1.11549	0.0905166	4.51481	9.86541	0.894878	0.303779	1.61871	0.750514
Closed-Loop	Baseline	8.76817	18.712	1.11549	0.0905166	4.51481	9.86541	0.746823	0.352443	1.88643	0.697782
Closed-Loop	Baseline	8.76817	18.712	1.11549	0.0905166	4.51481	9.86541	0.977289	0.298539	2.2696	0.768923
Closed-Loop	Baseline	8.76817	18.712	1.11549	0.0905166	4.51481	9.86541	0.985824	0.338756	2.01131	0.666424
Closed-Loop	Baseline	8.76817	18.712	1.11549	0.0905166	4.51481	9.86541	1.01356	0.247724	2.19786	0.697261
Closed-Loop	Baseline	8.76817	18.712	1.11549	0.0905166	4.51481	9.86541	1.07285	0.298687	2.52995	0.653879
Closed-Loop	Baseline	8.76817	18.712	1.11549	0.0905166	4.51481	9.86541	1.06376	0.268774	2.31158	0.700368
Closed-Loop	Baseline	8.76817	18.712	1.11549	0.0905166	4.51481	9.86541	1.02588	0.337349	2.02795	0.626073
Closed-Loop	Baseline	8.76817	18.712	1.11549	0.0905166	4.51481	9.86541	1.11955	0.301575	1.8467	0.675618
Closed-Loop	Baseline	8.76817	18.712	1.11549	0.0905166	4.51481	9.86541	0.848103	0.334504	1.23394	0.628187
Closed-Loop	Baseline	8.76817	18.712	1.11549	0.0905166	4.51481	9.86541	1.05046	0.354386	1.94948	0.734696
Closed-Loop	Baseline	8.76817	18.712	1.11549	0.0905166	4.51481	9.86541	1.06265	0.334581	1.9022	0.735829
Closed-Loop	Baseline	8.76817	18.712	1.11549	0.0905166	4.51481	9.86541	0.876044	0.313656	2.11711	0.613487
Closed-Loop	Baseline	8.76817	18.712	1.11549	0.0905166	4.51481	9.86541	0.849713	0.250089	1.95383	0.766694
Closed-Loop	Baseline	8.76817	18.712	1.11549	0.0905166	4.51481	9.86541	0.925406	0.299861	1.90388	0.824871
Closed-Loop	Baseline	8.76817	18.712	1.11549	0.0905166	4.51481	9.86541	0.933846	0.273345	1.46618	0.7023
Closed-Loop	Baseline	8.76817	18.712	1.11549	0.0905166	4.51481	9.86541	1.07534	0.282797	1.71801	0.667944
Closed-Loop	Baseline	8.76817	18.712	1.11549	0.0905166	4.51481	9.86541	0.938546	0.281273	2.143	0.841217
Closed-Loop	Baseline	8.76817	18.712	1.11549	0.0905166	4.51481	9.86541	0.914365	0.251004	2.51477	0.634052
Closed-Loop	Baseline	8.76817	18.712	1.11549	0.0905166	4.51481	9.86541	0.938837	0.202133	1.97074	0.701005
Closed-Loop	Baseline	8.76817	18.712	1.11549	0.0905166	4.51481	9.86541	1.11186	0.266593	2.09834	0.708981
Closed-Loop	Baseline	8.76817	18.712	1.11549	0.0905166	4.51481	9.86541	1.0013	0.309669	2.28574	0.767257
Closed-Loop	Baseline	8.76817	18.712	1.11549	0.0905166	4.51481	9.86541	0.982075	0.232591	1.75673	0.717987
Closed-Loop	Baseline	8.76817	18.712	1.11549	0.0905166	4.51481	9.86541	0.988999	0.300784	2.11004	0.675068
Closed-Loop	Baseline	8.76817	18.712	1.11549	0.0905166	4.51481	9.86541	1.12921	0.395013	1.77785	0.652441
Closed-Loop	Baseline	8.76817	18.712	1.11549	0.0905166	4.51481	9.86541	0.925083	0.351153	2.25945	0.682909
Closed-Loop	Baseline	8.76817	18.712	1.11549	0.0905166	4.51481	9.86541	1.13155	0.382177	2.04542	0.649654
Closed-Loop	Baseline	8.76817	18.712	1.11549	0.0905166	4.51481	9.86541	1.02105	0.319556	2.08954	0.702391
Closed-Loop	Baseline	8.76817	18.712	1.11549	0.0905166	4.51481	9.86541	0.983958	0.358375	1.76522	0.67179
Closed-Loop	Baseline	8.76817	18.712	1.11549	0.0905166	4.51481	9.86541	1.25009	0.263802	2.21211	0.625298
Closed-Loop	Baseline	8.76817	18.712	1.11549	0.0905166	4.51481	9.86541	0.894436	0.267783	2.62541	0.762757
Closed-Loop	Baseline	8.76817	18.712	1.11549	0.0905166	4.51481	9.86541	0.964631	0.163043	1.69763	0.675116
Closed-Loop	Baseline	8.76817	18.712	1.11549	0.0905166	4.51481	9.86541	0.876757	0.359307	1.89807	0.636593
Closed-Loop	Baseline	8.76817	18.712	1.11549	0.0905166	4.51481	9.86541	1.09525	0.377016	2.06948	0.691587
Closed-Loop	Baseline	8.76817	18.712	1.11549	0.0905166	4.51481	9.86541	1.16892	0.272341	2.23592	0.703419
Closed-Loop	Baseline	8.76817	18.712	1.11549	0.0905166	4.51481	9.86541	1.16699	0.287302	1.83214	0.612677
Closed-Loop	Baseline	8.76817	18.712	1.11549	0.0905166	4.51481	9.86541	1.12239	0.262307	1.15009	0.716582
Closed-Loop	Baseline	8.76817	18.712	1.11549	0.0905166	4.51481	9.86541	0.980238	0.319133	2.40776	0.647642
Closed-Loop	Baseline	8.76817	18.712	1.11549	0.0905166	4.51481	9.86541	0.963476	0.356247	2.22815	0.785551
Closed-Loop	Baseline	8.76817	18.712	1.11549	0.0905166	4.51481	9.86541	0.832883	0.212861	1.47712	0.726198
Closed-Loop	Baseline	8.76817	18.712	1.11549	0.0905166	4.51481	9.86541	1.20359	0.320472	1.81773	0.680005
Closed-Loop	Baseline	8.76817	18.712	1.11549	0.0905166	4.51481	9.86541	1.0469	0.286166	2.47045	0.662742
Closed-Loop	Baseline	8.76817	18.712	1.11549	0.0905166	4.51481	9.86541	0.950804	0.30567	2.43434	0.694752
Closed-Loop	Baseline	8.76817	18.712	1.11549	0.0905166	4.51481	9.86541	1.13281	0.32295	2.28159	0.73064
Closed-Loop	Baseline	8.76817	18.712	1.11549	0.0905166	4.51481	9.86541	0.902724	0.29059	1.94717	0.698725
Closed-Loop	Baseline	8.76817	18.712	1.11549	0.0905166	4.51481	9.86541	1.04066	0.294821	2.0249	0.689142
Closed-Loop	Baseline	8.76817	18.712	1.11549	0.0905166	4.51481	9.86541	0.982737	0.289306	1.96072	0.702919
Closed-Loop	Baseline	8.76817	18.712	1.11549	0.0905166	4.51481	9.86541	1.06387	0.348516	2.33847	0.669807
Closed-Loop	Baseline	17.9696	17.2682	1.06649	0.0974475	7.64039	15.1885	0.951638	0.296821	2.12563	0.656208
Closed-Loop	Baseline	17.9696	17.2682	1.06649	0.0974475	7.64039	15.1885	1.08418	0.227454	2.06618	0.65971
Closed-Loop	Baseline	17.9696	17.2682	1.06649	0.0974475	7.64039	15.1885	0.894878	0.303779	1.61871	0.750514
Closed-Loop	Baseline	17.9696	17.2682	1.06649	0.0974475	7.64039	15.1885	0.746823	0.352443	1.88643	0.697782
Closed-Loop	Baseline	17.9696	17.2682	1.06649	0.0974475	7.64039	15.1885	0.977289	0.298539	2.2696	0.768923
Closed-Loop	Baseline	17.9696	17.2682	1.06649	0.0974475	7.64039	15.1885	0.985824	0.338756	2.01131	0.666424
Closed-Loop	Baseline	17.9696	17.2682	1.06649	0.0974475	7.64039	15.1885	1.01356	0.247724	2.19786	0.697261
Closed-Loop	Baseline	17.9696	17.2682	1.06649	0.0974475	7.64039	15.1885	1.07285	0.298687	2.52995	0.653879
Closed-Loop	Baseline	17.9696	17.2682	1.06649	0.0974475	7.64039	15.1885	1.06376	0.268774	2.31158	0.700368
Closed-Loop	Baseline	17.9696	17.2682	1.06649	0.0974475	7.64039	15.1885	1.02588	0.337349	2.02795	0.626073
Closed-Loop	Baseline	17.9696	17.2682	1.06649	0.0974475	7.64039	15.1885	1.11955	0.301575	1.8467	0.675618
Closed-Loop	Baseline	17.9696	17.2682	1.06649	0.0974475	7.64039	15.1885	0.848103	0.334504	1.23394	0.628187
Closed-Loop	Baseline	17.9696	17.2682	1.06649	0.0974475	7.64039	15.1885	1.05046	0.354386	1.94948	0.734696
Closed-Loop	Baseline	17.9696	17.2682	1.06649	0.0974475	7.64039	15.1885	1.06265	0.334581	1.9022	0.735829
Closed-Loop	Baseline	17.9696	17.2682	1.06649	0.0974475	7.64039	15.1885	0.876044	0.313656	2.11711	0.613487
Closed-Loop	Baseline	17.9696	17.2682	1.06649	0.0974475	7.64039	15.1885	0.849713	0.250089	1.95383	0.766694
Closed-Loop	Baseline	17.9696	17.2682	1.06649	0.0974475	7.64039	15.1885	0.925406	0.299861	1.90388	0.824871
Closed-Loop	Baseline	17.9696	17.2682	1.06649	0.0974475	7.64039	15.1885	0.933846	0.273345	1.46618	0.7023
Closed-Loop	Baseline	17.9696	17.2682	1.06649	0.0974475	7.64039	15.1885	1.07534	0.282797	1.71801	0.667944
Closed-Loop	Baseline	17.9696	17.2682	1.06649	0.0974475	7.64039	15.1885	0.938546	0.281273	2.143	0.841217
Closed-Loop	Baseline	17.9696	17.2682	1.06649	0.0974475	7.64039	15.1885	0.914365	0.251004	2.51477	0.634052
Closed-Loop	Baseline	17.9696	17.2682	1.06649	0.0974475	7.64039	15.1885	0.938837	0.202133	1.97074	0.701005
Closed-Loop	Baseline	17.9696	17.2682	1.06649	0.0974475	7.64039	15.1885	1.11186	0.266593	2.09834	0.708981
Closed-Loop	Baseline	17.9696	17.2682	1.06649	0.0974475	7.64039	15.1885	1.0013	0.309669	2.28574	0.767257
Closed-Loop	Baseline	17.9696	17.2682	1.06649	0.0974475	7.64039	15.1885	0.982075	0.232591	1.75673	0.717987
Closed-Loop	Baseline	17.9696	17.2682	1.06649	0.0974475	7.64039	15.1885	0.988999	0.300784	2.11004	0.675068
Closed-Loop	Baseline	17.9696	17.2682	1.06649	0.0974475	7.64039	15.1885	1.12921	0.395013	1.77785	0.652441
Closed-Loop	Baseline	17.9696	17.2682	1.06649	0.0974475	7.64039	15.1885	0.925083	0.351153	2.25945	0.682909
Closed-Loop	Baseline	17.9696	17.2682	1.06649	0.0974475	7.64039	15.1885	1.13155	0.382177	2.04542	0.649654
Closed-Loop	Baseline	17.9696	17.2682	1.06649	0.0974475	7.64039	15.1885	1.02105	0.319556	2.08954	0.702391
Closed-Loop	Baseline	17.9696	17.2682	1.06649	0.0974475	7.64039	15.1885	0.983958	0.358375	1.76522	0.67179
Closed-Loop	Baseline	17.9696	17.2682	1.06649	0.0974475	7.64039	15.1885	1.25009	0.263802	2.21211	0.625298
Closed-Loop	Baseline	17.9696	17.2682	1.06649	0.0974475	7.64039	15.1885	0.894436	0.267783	2.62541	0.762757
Closed-Loop	Baseline	17.9696	17.2682	1.06649	0.0974475	7.64039	15.1885	0.964631	0.163043	1.69763	0.675116
Closed-Loop	Baseline	17.9696	17.2682	1.06649	0.0974475	7.64039	15.1885	0.876757	0.359307	1.89807	0.636593
Closed-Loop	Baseline	17.9696	17.2682	1.06649	0.0974475	7.64039	15.1885	1.09525	0.377016	2.06948	0.691587
Closed-Loop	Baseline	17.9696	17.2682	1.06649	0.0974475	7.64039	15.1885	1.16892	0.272341	2.23592	0.703419
Closed-Loop	Baseline	17.9696	17.2682	1.06649	0.0974475	7.64039	15.1885	1.16699	0.287302	1.83214	0.612677
Closed-Loop	Baseline	17.9696	17.2682	1.06649	0.0974475	7.64039	15.1885	1.12239	0.262307	1.15009	0.716582
Closed-Loop	Baseline	17.9696	17.2682	1.06649	0.0974475	7.64039	15.1885	0.980238	0.319133	2.40776	0.647642
Closed-Loop	Baseline	17.9696	17.2682	1.06649	0.0974475	7.64039	15.1885	0.963476	0.356247	2.22815	0.785551
Closed-Loop	Baseline	17.9696	17.2682	1.06649	0.0974475	7.64039	15.1885	0.832883	0.212861	1.47712	0.726198
Closed-Loop	Baseline	17.9696	17.2682	1.06649	0.0974475	7.64039	15.1885	1.20359	0.320472	1.81773	0.680005
Closed-Loop	Baseline	17.9696	17.2682	1.06649	0.0974475	7.64039	15.1885	1.0469	0.286166	2.47045	0.662742
Closed-Loop	Baseline	17.9696	17.2682	1.06649	0.0974475	7.64039	15.1885	0.950804	0.30567	2.43434	0.694752
Closed-Loop	Baseline	17.9696	17.2682	1.06649	0.0974475	7.64039	15.1885	1.13281	0.32295	2.28159	0.73064
Closed-Loop	Baseline	17.9696	17.2682	1.06649	0.0974475	7.64039	15.1885	0.902724	0.29059	1.94717	0.698725
Closed-Loop	Baseline	17.9696	17.2682	1.06649	0.0974475	7.64039	15.1885	1.04066	0.294821	2.0249	0.689142
Closed-Loop	Baseline	17.9696	17.2682	1.06649	0.0974475	7.64039	15.1885	0.982737	0.289306	1.96072	0.702919
Closed-Loop	Baseline	17.9696	17.2682	1.06649	0.0974475	7.64039	15.1885	1.06387	0.348516	2.33847	0.669807
Closed-Loop	Baseline	23.6383	13.0145	0.966226	0.0751437	7.63525	18.3897	0.951638	0.296821	2.12563	0.656208
Closed-Loop	Baseline	23.6383	13.0145	0.966226	0.0751437	7.63525	18.3897	1.08418	0.227454	2.06618	0.65971
Closed-Loop	Baseline	23.6383	13.0145	0.966226	0.0751437	7.63525	18.3897	0.894878	0.303779	1.61871	0.750514
Closed-Loop	Baseline	23.6383	13.0145	0.966226	0.0751437	7.63525	18.3897	0.746823	0.352443	1.88643	0.697782
Closed-Loop	Baseline	23.6383	13.0145	0.966226	0.0751437	7.63525	18.3897	0.977289	0.298539	2.2696	0.768923
Closed-Loop	Baseline	23.6383	13.0145	0.966226	0.0751437	7.63525	18.3897	0.985824	0.338756	2.01131	0.666424
Closed-Loop	Baseline	23.6383	13.0145	0.966226	0.0751437	7.63525	18.3897	1.01356	0.247724	2.19786	0.697261
Closed-Loop	Baseline	23.6383	13.0145	0.966226	0.0751437	7.63525	18.3897	1.07285	0.298687	2.52995	0.653879
Closed-Loop	Baseline	23.6383	13.0145	0.966226	0.0751437	7.63525	18.3897	1.06376	0.268774	2.31158	0.700368
Closed-Loop	Baseline	23.6383	13.0145	0.966226	0.0751437	7.63525	18.3897	1.02588	0.337349	2.02795	0.626073
Closed-Loop	Baseline	23.6383	13.0145	0.966226	0.0751437	7.63525	18.3897	1.11955	0.301575	1.8467	0.675618
Closed-Loop	Baseline	23.6383	13.0145	0.966226	0.0751437	7.63525	18.3897	0.848103	0.334504	1.23394	0.628187
Closed-Loop	Baseline	23.6383	13.0145	0.966226	0.0751437	7.63525	18.3897	1.05046	0.354386	1.94948	0.734696
Closed-Loop	Baseline	23.6383	13.0145	0.966226	0.0751437	7.63525	18.3897	1.06265	0.334581	1.9022	0.735829
Closed-Loop	Baseline	23.6383	13.0145	0.966226	0.0751437	7.63525	18.3897	0.876044	0.313656	2.11711	0.613487
Closed-Loop	Baseline	23.6383	13.0145	0.966226	0.0751437	7.63525	18.3897	0.849713	0.250089	1.95383	0.766694
Closed-Loop	Baseline	23.6383	13.0145	0.966226	0.0751437	7.63525	18.3897	0.925406	0.299861	1.90388	0.824871
Closed-Loop	Baseline	23.6383	13.0145	0.966226	0.0751437	7.63525	18.3897	0.933846	0.273345	1.46618	0.7023
Closed-Loop	Baseline	23.6383	13.0145	0.966226	0.0751437	7.63525	18.3897	1.07534	0.282797	1.71801	0.667944
Closed-Loop	Baseline	23.6383	13.0145	0.966226	0.0751437	7.63525	18.3897	0.938546	0.281273	2.143	0.841217
Closed-Loop	Baseline	23.6383	13.0145	0.966226	0.0751437	7.63525	18.3897	0.914365	0.251004	2.51477	0.634052
Closed-Loop	Baseline	23.6383	13.0145	0.966226	0.0751437	7.63525	18.3897	0.938837	0.202133	1.97074	0.701005
Closed-Loop	Baseline	23.6383	13.0145	0.966226	0.0751437	7.63525	18.3897	1.11186	0.266593	2.09834	0.708981
Closed-Loop	Baseline	23.6383	13.0145	0.966226	0.0751437	7.63525	18.3897	1.0013	0.309669	2.28574	0.767257
Closed-Loop	Baseline	23.6383	13.0145	0.966226	0.0751437	7.63525	18.3897	0.982075	0.232591	1.75673	0.717987
Closed-Loop	Baseline	23.6383	13.0145	0.966226	0.0751437	7.63525	18.3897	0.988999	0.300784	2.11004	0.675068
Closed-Loop	Baseline	23.6383	13.0145	0.966226	0.0751437	7.63525	18.3897	1.12921	0.395013	1.77785	0.652441
Closed-Loop	Baseline	23.6383	13.0145	0.966226	0.0751437	7.63525	18.3897	0.925083	0.351153	2.25945	0.682909
Closed-Loop	Baseline	23.6383	13.0145	0.966226	0.0751437	7.63525	18.3897	1.13155	0.382177	2.04542	0.649654
Closed-Loop	Baseline	23.6383	13.0145	0.966226	0.0751437	7.63525	18.3897	1.02105	0.319556	2.08954	0.702391
Closed-Loop	Baseline	23.6383	13.0145	0.966226	0.0751437	7.63525	18.3897	0.983958	0.358375	1.76522	0.67179
Closed-Loop	Baseline	23.6383	13.0145	0.966226	0.0751437	7.63525	18.3897	1.25009	0.263802	2.21211	0.625298
Closed-Loop	Baseline	23.6383	13.0145	0.966226	0.0751437	7.63525	18.3897	0.894436	0.267783	2.62541	0.762757
Closed-Loop	Baseline	23.6383	13.0145	0.966226	0.0751437	7.63525	18.3897	0.964631	0.163043	1.69763	0.675116
Closed-Loop	Baseline	23.6383	13.0145	0.966226	0.0751437	7.63525	18.3897	0.876757	0.359307	1.89807	0.636593
Closed-Loop	Baseline	23.6383	13.0145	0.966226	0.0751437	7.63525	18.3897	1.09525	0.377016	2.06948	0.691587
Closed-Loop	Baseline	23.6383	13.0145	0.966226	0.0751437	7.63525	18.3897	1.16892	0.272341	2.23592	0.703419
Closed-Loop	Baseline	23.6383	13.0145	0.966226	0.0751437	7.63525	18.3897	1.16699	0.287302	1.83214	0.612677
Closed-Loop	Baseline	23.6383	13.0145	0.966226	0.0751437	7.63525	18.3897	1.12239	0.262307	1.15009	0.716582
Closed-Loop	Baseline	23.6383	13.0145	0.966226	0.0751437	7.63525	18.3897	0.980238	0.319133	2.40776	0.647642
Closed-Loop	Baseline	23.6383	13.0145	0.966226	0.0751437	7.63525	18.3897	0.963476	0.356247	2.22815	0.785551
Closed-Loop	Baseline	23.6383	13.0145	0.966226	0.0751437	7.63525	18.3897	0.832883	0.212861	1.47712	0.726198
Closed-Loop	Baseline	23.6383	13.0145	0.966226	0.0751437	7.63525	18.3897	1.20359	0.320472	1.81773	0.680005
Closed-Loop	Baseline	23.6383	13.0145	0.966226	0.0751437	7.63525	18.3897	1.0469	0.286166	2.47045	0.662742
Closed-Loop	Baseline	23.6383	13.0145	0.966226	0.0751437	7.63525	18.3897	0.950804	0.30567	2.43434	0.694752
Closed-Loop	Baseline	23.6383	13.0145	0.966226	0.0751437	7.63525	18.3897	1.13281	0.32295	2.28159	0.73064
Closed-Loop	Baseline	23.6383	13.0145	0.966226	0.0751437	7.63525	18.3897	0.902724	0.29059	1.94717	0.698725
Closed-Loop	Baseline	23.6383	13.0145	0.966226	0.0751437	7.63525	18.3897	1.04066	0.294821	2.0249	0.689142
Closed-Loop	Baseline	23.6383	13.0145	0.966226	0.0751437	7.63525	18.3897	0.982737	0.289306	1.96072	0.702919
Closed-Loop	Baseline	23.6383	13.0145	0.966226	0.0751437	7.63525	18.3897	1.06387	0.348516	2.33847	0.669807
Closed-Loop	Baseline	30.7993	16.4525	0.86871	0.0722976	6.91024	14.3635	0.951638	0.296821	2.12563	0.656208
Closed-Loop	Baseline	30.7993	16.4525	0.86871	0.0722976	6.91024	14.3635	1.08418	0.227454	2.06618	0.65971
Closed-Loop	Baseline	30.7993	16.4525	0.86871	0.0722976	6.91024	14.3635	0.894878	0.303779	1.61871	0.750514
Closed-Loop	Baseline	30.7993	16.4525	0.86871	0.0722976	6.91024	14.3635	0.746823	0.352443	1.88643	0.697782
Closed-Loop	Baseline	30.7993	16.4525	0.86871	0.0722976	6.91024	14.3635	0.977289	0.298539	2.2696	0.768923
Closed-Loop	Baseline	30.7993	16.4525	0.86871	0.0722976	6.91024	14.3635	0.985824	0.338756	2.01131	0.666424
Closed-Loop	Baseline	30.7993	16.4525	0.86871	0.0722976	6.91024	14.3635	1.01356	0.247724	2.19786	0.697261
Closed-Loop	Baseline	30.7993	16.4525	0.86871	0.0722976	6.91024	14.3635	1.07285	0.298687	2.52995	0.653879
Closed-Loop	Baseline	30.7993	16.4525	0.86871	0.0722976	6.91024	14.3635	1.06376	0.268774	2.31158	0.700368
Closed-Loop	Baseline	30.7993	16.4525	0.86871	0.0722976	6.91024	14.3635	1.02588	0.337349	2.02795	0.626073
Closed-Loop	Baseline	30.7993	16.4525	0.86871	0.0722976	6.91024	14.3635	1.11955	0.301575	1.8467	0.675618
Closed-Loop	Baseline	30.7993	16.4525	0.86871	0.0722976	6.91024	14.3635	0.848103	0.334504	1.23394	0.628187
Closed-Loop	Baseline	30.7993	16.4525	0.86871	0.0722976	6.91024	14.3635	1.05046	0.354386	1.94948	0.734696
Closed-Loop	Baseline	30.7993	16.4525	0.86871	0.0722976	6.91024	14.3635	1.06265	0.334581	1.9022	0.735829
Closed-Loop	Baseline	30.7993	16.4525	0.86871	0.0722976	6.91024	14.3635	0.876044	0.313656	2.11711	0.613487
Closed-Loop	Baseline	30.7993	16.4525	0.86871	0.0722976	6.91024	14.3635	0.849713	0.250089	1.95383	0.766694
Closed-Loop	Baseline	30.7993	16.4525	0.86871	0.0722976	6.91024	14.3635	0.925406	0.299861	1.90388	0.824871
Closed-Loop	Baseline	30.7993	16.4525	0.86871	0.0722976	6.91024	14.3635	0.933846	0.273345	1.46618	0.7023
Closed-Loop	Baseline	30.7993	16.4525	0.86871	0.0722976	6.91024	14.3635	1.07534	0.282797	1.71801	0.667944
Closed-Loop	Baseline	30.7993	16.4525	0.86871	0.0722976	6.91024	14.3635	0.938546	0.281273	2.143	0.841217
Closed-Loop	Baseline	30.7993	16.4525	0.86871	0.0722976	6.91024	14.3635	0.914365	0.251004	2.51477	0.634052
Closed-Loop	Baseline	30.7993	16.4525	0.86871	0.0722976	6.91024	14.3635	0.938837	0.202133	1.97074	0.701005
Closed-Loop	Baseline	30.7993	16.4525	0.86871	0.0722976	6.91024	14.3635	1.11186	0.266593	2.09834	0.708981
Closed-Loop	Baseline	30.7993	16.4525	0.86871	0.0722976	6.91024	14.3635	1.0013	0.309669	2.28574	0.767257
Closed-Loop	Baseline	30.7993	16.4525	0.86871	0.0722976	6.91024	14.3635	0.982075	0.232591	1.75673	0.717987
Closed-Loop	Baseline	30.7993	16.4525	0.86871	0.0722976	6.91024	14.3635	0.988999	0.300784	2.11004	0.675068
Closed-Loop	Baseline	30.7993	16.4525	0.86871	0.0722976	6.91024	14.3635	1.12921	0.395013	1.77785	0.652441
Closed-Loop	Baseline	30.7993	16.4525	0.86871	0.0722976	6.91024	14.3635	0.925083	0.351153	2.25945	0.682909
Closed-Loop	Baseline	30.7993	16.4525	0.86871	0.0722976	6.91024	14.3635	1.13155	0.382177	2.04542	0.649654
Closed-Loop	Baseline	30.7993	16.4525	0.86871	0.0722976	6.91024	14.3635	1.02105	0.319556	2.08954	0.702391
Closed-Loop	Baseline	30.7993	16.4525	0.86871	0.0722976	6.91024	14.3635	0.983958	0.358375	1.76522	0.67179
Closed-Loop	Baseline	30.7993	16.4525	0.86871	0.0722976	6.91024	14.3635	1.25009	0.263802	2.21211	0.625298
Closed-Loop	Baseline	30.7993	16.4525	0.86871	0.0722976	6.91024	14.3635	0.894436	0.267783	2.62541	0.762757
Closed-Loop	Baseline	30.7993	16.4525	0.86871	0.0722976	6.91024	14.3635	0.964631	0.163043	1.69763	0.675116
Closed-Loop	Baseline	30.7993	16.4525	0.86871	0.0722976	6.91024	14.3635	0.876757	0.359307	1.89807	0.636593
Closed-Loop	Baseline	30.7993	16.4525	0.86871	0.0722976	6.91024	14.3635	1.09525	0.377016	2.06948	0.691587
Closed-Loop	Baseline	30.7993	16.4525	0.86871	0.0722976	6.91024	14.3635	1.16892	0.272341	2.23592	0.703419
Closed-Loop	Baseline	30.7993	16.4525	0.86871	0.0722976	6.91024	14.3635	1.16699	0.287302	1.83214	0.612677
Closed-Loop	Baseline	30.7993	16.4525	0.86871	0.0722976	6.91024	14.3635	1.12239	0.262307	1.15009	0.716582
Closed-Loop	Baseline	30.7993	16.4525	0.86871	0.0722976	6.91024	14.3635	0.980238	0.319133	2.40776	0.647642
Closed-Loop	Baseline	30.7993	16.4525	0.86871	0.0722976	6.91024	14.3635	0.963476	0.356247	2.22815	0.785551
Closed-Loop	Baseline	30.7993	16.4525	0.86871	0.0722976	6.91024	14.3635	0.832883	0.212861	1.47712	0.726198
Closed-Loop	Baseline	30.7993	16.4525	0.86871	0.0722976	6.91024	14.3635	1.20359	0.320472	1.81773	0.680005
Closed-Loop	Baseline	30.7993	16.4525	0.86871	0.0722976	6.91024	14.3635	1.0469	0.286166	2.47045	0.662742
Closed-Loop	Baseline	30.7993	16.4525	0.86871	0.0722976	6.91024	14.3635	0.950804	0.30567	2.43434	0.694752
Closed-Loop	Baseline	30.7993	16.4525	0.86871	0.0722976	6.91024	14.3635	1.13281	0.32295	2.28159	0.73064
Closed-Loop	Baseline	30.7993	16.4525	0.86871	0.0722976	6.91024	14.3635	0.902724	0.29059	1.94717	0.698725
Closed-Loop	Baseline	30.7993	16.4525	0.86871	0.0722976	6.91024	14.3635	1.04066	0.294821	2.0249	0.689142
Closed-Loop	Baseline	30.7993	16.4525	0.86871	0.0722976	6.91024	14.3635	0.982737	0.289306	1.96072	0.702919
Closed-Loop	Baseline	30.7993	16.4525	0.86871	0.0722976	6.91024	14.3635	1.06387	0.348516	2.33847	0.669807
Closed-Loop	Baseline	13.1676	11.2221	1.00637	0.0751918	6.94002	13.222	0.951638	0.296821	2.12563	0.656208
Closed-Loop	Baseline	13.1676	11.2221	1.00637	0.0751918	6.94002	13.222	1.08418	0.227454	2.06618	0.65971
Closed-Loop	Baseline	13.1676	11.2221	1.00637	0.0751918	6.94002	13.222	0.894878	0.303779	1.61871	0.750514
Closed-Loop	Baseline	13.1676	11.2221	1.00637	0.0751918	6.94002	13.222	0.746823	0.352443	1.88643	0.697782
Closed-Loop	Baseline	13.1676	11.2221	1.00637	0.0751918	6.94002	13.222	0.977289	0.298539	2.2696	0.768923
Closed-Loop	Baseline	13.1676	11.2221	1.00637	0.0751918	6.94002	13.222	0.985824	0.338756	2.01131	0.666424
Closed-Loop	Baseline	13.1676	11.2221	1.00637	0.0751918	6.94002	13.222	1.01356	0.247724	2.19786	0.697261
Closed-Loop	Baseline	13.1676	11.2221	1.00637	0.0751918	6.94002	13.222	1.07285	0.298687	2.52995	0.653879
Closed-Loop	Baseline	13.1676	11.2221	1.00637	0.0751918	6.94002	13.222	1.06376	0.268774	2.31158	0.700368
Closed-Loop	Baseline	13.1676	11.2221	1.00637	0.0751918	6.94002	13.222	1.02588	0.337349	2.02795	0.626073
Closed-Loop	Baseline	13.1676	11.2221	1.00637	0.0751918	6.94002	13.222	1.11955	0.301575	1.8467	0.675618
Closed-Loop	Baseline	13.1676	11.2221	1.00637	0.0751918	6.94002	13.222	0.848103	0.334504	1.23394	0.628187
Closed-Loop	Baseline	13.1676	11.2221	1.00637	0.0751918	6.94002	13.222	1.05046	0.354386	1.94948	0.734696
Closed-Loop	Baseline	13.1676	11.2221	1.00637	0.0751918	6.94002	13.222	1.06265	0.334581	1.9022	0.735829
Closed-Loop	Baseline	13.1676	11.2221	1.00637	0.0751918	6.94002	13.222	0.876044	0.313656	2.11711	0.613487
Closed-Loop	Baseline	13.1676	11.2221	1.00637	0.0751918	6.94002	13.222	0.849713	0.250089	1.95383	0.766694
Closed-Loop	Baseline	13.1676	11.2221	1.00637	0.0751918	6.94002	13.222	0.925406	0.299861	1.90388	0.824871
Closed-Loop	Baseline	13.1676	11.2221	1.00637	0.0751918	6.94002	13.222	0.933846	0.273345	1.46618	0.7023
Closed-Loop	Baseline	13.1676	11.2221	1.00637	0.0751918	6.94002	13.222	1.07534	0.282797	1.71801	0.667944
Closed-Loop	Baseline	13.1676	11.2221	1.00637	0.0751918	6.94002	13.222	0.938546	0.281273	2.143	0.841217
Closed-Loop	Baseline	13.1676	11.2221	1.00637	0.0751918	6.94002	13.222	0.914365	0.251004	2.51477	0.634052
Closed-Loop	Baseline	13.1676	11.2221	1.00637	0.0751918	6.94002	13.222	0.938837	0.202133	1.97074	0.701005
Closed-Loop	Baseline	13.1676	11.2221	1.00637	0.0751918	6.94002	13.222	1.11186	0.266593	2.09834	0.708981
Closed-Loop	Baseline	13.1676	11.2221	1.00637	0.0751918	6.94002	13.222	1.0013	0.309669	2.28574	0.767257
Closed-Loop	Baseline	13.1676	11.2221	1.00637	0.0751918	6.94002	13.222	0.982075	0.232591	1.75673	0.717987
Closed-Loop	Baseline	13.1676	11.2221	1.00637	0.0751918	6.94002	13.222	0.988999	0.300784	2.11004	0.675068
Closed-Loop	Baseline	13.1676	11.2221	1.00637	0.0751918	6.94002	13.222	1.12921	0.395013	1.77785	0.652441
Closed-Loop	Baseline	13.1676	11.2221	1.00637	0.0751918	6.94002	13.222	0.925083	0.351153	2.25945	0.682909
Closed-Loop	Baseline	13.1676	11.2221	1.00637	0.0751918	6.94002	13.222	1.13155	0.382177	2.04542	0.649654
Closed-Loop	Baseline	13.1676	11.2221	1.00637	0.0751918	6.94002	13.222	1.02105	0.319556	2.08954	0.702391
Closed-Loop	Baseline	13.1676	11.2221	1.00637	0.0751918	6.94002	13.222	0.983958	0.358375	1.76522	0.67179
Closed-Loop	Baseline	13.1676	11.2221	1.00637	0.0751918	6.94002	13.222	1.25009	0.263802	2.21211	0.625298
Closed-Loop	Baseline	13.1676	11.2221	1.00637	0.0751918	6.94002	13.222	0.894436	0.267783	2.62541	0.762757
Closed-Loop	Baseline	13.1676	11.2221	1.00637	0.0751918	6.94002	13.222	0.964631	0.163043	1.69763	0.675116
Closed-Loop	Baseline	13.1676	11.2221	1.00637	0.0751918	6.94002	13.222	0.876757	0.359307	1.89807	0.636593
Closed-Loop	Baseline	13.1676	11.2221	1.00637	0.0751918	6.94002	13.222	1.09525	0.377016	2.06948	0.691587
Closed-Loop	Baseline	13.1676	11.2221	1.00637	0.0751918	6.94002	13.222	1.16892	0.272341	2.23592	0.703419
Closed-Loop	Baseline	13.1676	11.2221	1.00637	0.0751918	6.94002	13.222	1.16699	0.287302	1.83214	0.612677
Closed-Loop	Baseline	13.1676	11.2221	1.00637	0.0751918	6.94002	13.222	1.12239	0.262307	1.15009	0.716582
Closed-Loop	Baseline	13.1676	11.2221	1.00637	0.0751918	6.94002	13.222	0.980238	0.319133	2.40776	0.647642
Closed-Loop	Baseline	13.1676	11.2221	1.00637	0.0751918	6.94002	13.222	0.963476	0.356247	2.22815	0.785551
Closed-Loop	Baseline	13.1676	11.2221	1.00637	0.0751918	6.94002	13.222	0.832883	0.212861	1.47712	0.726198
Closed-Loop	Baseline	13.1676	11.2221	1.00637	0.0751918	6.94002	13.222	1.20359	0.320472	1.81773	0.680005
Closed-Loop	Baseline	13.1676	11.2221	1.00637	0.0751918	6.94002	13.222	1.0469	0.286166	2.47045	0.662742
Closed-Loop	Baseline	13.1676	11.2221	1.00637	0.0751918	6.94002	13.222	0.950804	0.30567	2.43434	0.694752
Closed-Loop	Baseline	13.1676	11.2221	1.00637	0.0751918	6.94002	13.222	1.13281	0.32295	2.28159	0.73064
Closed-Loop	Baseline	13.1676	11.2221	1.00637	0.0751918	6.94002	13.222	0.902724	0.29059	1.94717	0.698725
Closed-Loop	Baseline	13.1676	11.2221	1.00637	0.0751918	6.94002	13.222	1.04066	0.294821	2.0249	0.689142
Closed-Loop	Baseline	13.1676	11.2221	1.00637	0.0751918	6.94002	13.222	0.982737	0.289306	1.96072	0.702919
Closed-Loop	Baseline	13.1676	11.2221	1.00637	0.0751918	6.94002	13.222	1.06387	0.348516	2.33847	0.669807
Closed-Loop	Baseline	23.2741	10.5224	0.750388	0.0872384	5.51959	13.9661	0.951638	0.296821	2.12563	0.656208
Closed-Loop	Baseline	23.2741	10.5224	0.750388	0.0872384	5.51959	13.9661	1.08418	0.227454	2.06618	0.65971
Closed-Loop	Baseline	23.2741	10.5224	0.750388	0.0872384	5.51959	13.9661	0.894878	0.303779	1.61871	0.750514
Closed-Loop	Baseline	23.2741	10.5224	0.750388	0.0872384	5.51959	13.9661	0.746823	0.352443	1.88643	0.697782
Closed-Loop	Baseline	23.2741	10.5224	0.750388	0.0872384	5.51959	13.9661	0.977289	0.298539	2.2696	0.768923
Closed-Loop	Baseline	23.2741	10.5224	0.750388	0.0872384	5.51959	13.9661	0.985824	0.338756	2.01131	0.666424
Closed-Loop	Baseline	23.2741	10.5224	0.750388	0.0872384	5.51959	13.9661	1.01356	0.247724	2.19786	0.697261
Closed-Loop	Baseline	23.2741	10.5224	0.750388	0.0872384	5.51959	13.9661	1.07285	0.298687	2.52995	0.653879
Closed-Loop	Baseline	23.2741	10.5224	0.750388	0.0872384	5.51959	13.9661	1.06376	0.268774	2.31158	0.700368
Closed-Loop	Baseline	23.2741	10.5224	0.750388	0.0872384	5.51959	13.9661	1.02588	0.337349	2.02795	0.626073
Closed-Loop	Baseline	23.2741	10.5224	0.750388	0.0872384	5.51959	13.9661	1.11955	0.301575	1.8467	0.675618
Closed-Loop	Baseline	23.2741	10.5224	0.750388	0.0872384	5.51959	13.9661	0.848103	0.334504	1.23394	0.628187
Closed-Loop	Baseline	23.2741	10.5224	0.750388	0.0872384	5.51959	13.9661	1.05046	0.354386	1.94948	0.734696
Closed-Loop	Baseline	23.2741	10.5224	0.750388	0.0872384	5.51959	13.9661	1.06265	0.334581	1.9022	0.735829
Closed-Loop	Baseline	23.2741	10.5224	0.750388	0.0872384	5.51959	13.9661	0.876044	0.313656	2.11711	0.613487
Closed-Loop	Baseline	23.2741	10.5224	0.750388	0.0872384	5.51959	13.9661	0.849713	0.250089	1.95383	0.766694
Closed-Loop	Baseline	23.2741	10.5224	0.750388	0.0872384	5.51959	13.9661	0.925406	0.299861	1.90388	0.824871
Closed-Loop	Baseline	23.2741	10.5224	0.750388	0.0872384	5.51959	13.9661	0.933846	0.273345	1.46618	0.7023
Closed-Loop	Baseline	23.2741	10.5224	0.750388	0.0872384	5.51959	13.9661	1.07534	0.282797	1.71801	0.667944
Closed-Loop	Baseline	23.2741	10.5224	0.750388	0.0872384	5.51959	13.9661	0.938546	0.281273	2.143	0.841217
Closed-Loop	Baseline	23.2741	10.5224	0.750388	0.0872384	5.51959	13.9661	0.914365	0.251004	2.51477	0.634052
Closed-Loop	Baseline	23.2741	10.5224	0.750388	0.0872384	5.51959	13.9661	0.938837	0.202133	1.97074	0.701005
Closed-Loop	Baseline	23.2741	10.5224	0.750388	0.0872384	5.51959	13.9661	1.11186	0.266593	2.09834	0.708981
Closed-Loop	Baseline	23.2741	10.5224	0.750388	0.0872384	5.51959	13.9661	1.0013	0.309669	2.28574	0.767257
Closed-Loop	Baseline	23.2741	10.5224	0.750388	0.0872384	5.51959	13.9661	0.982075	0.232591	1.75673	0.717987
Closed-Loop	Baseline	23.2741	10.5224	0.750388	0.0872384	5.51959	13.9661	0.988999	0.300784	2.11004	0.675068
Closed-Loop	Baseline	23.2741	10.5224	0.750388	0.0872384	5.51959	13.9661	1.12921	0.395013	1.77785	0.652441
Closed-Loop	Baseline	23.2741	10.5224	0.750388	0.0872384	5.51959	13.9661	0.925083	0.351153	2.25945	0.682909
Closed-Loop	Baseline	23.2741	10.5224	0.750388	0.0872384	5.51959	13.9661	1.13155	0.382177	2.04542	0.649654
Closed-Loop	Baseline	23.2741	10.5224	0.750388	0.0872384	5.51959	13.9661	1.02105	0.319556	2.08954	0.702391
Closed-Loop	Baseline	23.2741	10.5224	0.750388	0.0872384	5.51959	13.9661	0.983958	0.358375	1.76522	0.67179
Closed-Loop	Baseline	23.2741	10.5224	0.750388	0.0872384	5.51959	13.9661	1.25009	0.263802	2.21211	0.625298
Closed-Loop	Baseline	23.2741	10.5224	0.750388	0.0872384	5.51959	13.9661	0.894436	0.267783	2.62541	0.762757
Closed-Loop	Baseline	23.2741	10.5224	0.750388	0.0872384	5.51959	13.9661	0.964631	0.163043	1.69763	0.675116
Closed-Loop	Baseline	23.2741	10.5224	0.750388	0.0872384	5.51959	13.9661	0.876757	0.359307	1.89807	0.636593
Closed-Loop	Baseline	23.2741	10.5224	0.750388	0.0872384	5.51959	13.9661	1.09525	0.377016	2.06948	0.691587
Closed-Loop	Baseline	23.2741	10.5224	0.750388	0.0872384	5.51959	13.9661	1.16892	0.272341	2.23592	0.703419
Closed-Loop	Baseline	23.2741	10.5224	0.750388	0.0872384	5.51959	13.9661	1.16699	0.287302	1.83214	0.612677
Closed-Loop	Baseline	23.2741	10.5224	0.750388	0.0872384	5.51959	13.9661	1.12239	0.262307	1.15009	0.716582
Closed-Loop	Baseline	23.2741	10.5224	0.750388	0.0872384	5.51959	13.9661	0.980238	0.319133	2.40776	0.647642
Closed-Loop	Baseline	23.2741	10.5224	0.750388	0.0872384	5.51959	13.9661	0.963476	0.356247	2.22815	0.785551
Closed-Loop	Baseline	23.2741	10.5224	0.750388	0.0872384	5.51959	13.9661	0.832883	0.212861	1.47712	0.726198
Closed-Loop	Baseline	23.2741	10.5224	0.750388	0.0872384	5.51959	13.9661	1.20359	0.320472	1.81773	0.680005
Closed-Loop	Baseline	23.2741	10.5224	0.750388	0.0872384	5.51959	13.9661	1.0469	0.286166	2.47045	0.662742
Closed-Loop	Baseline	23.2741	10.5224	0.750388	0.0872384	5.51959	13.9661	0.950804	0.30567	2.43434	0.694752
Closed-Loop	Baseline	23.2741	10.5224	0.750388	0.0872384	5.51959	13.9661	1.13281	0.32295	2.28159	0.73064
Closed-Loop	Baseline	23.2741	10.5224	0.750388	0.0872384	5.51959	13.9661	0.902724	0.29059	1.94717	0.698725
Closed-Loop	Baseline	23.2741	10.5224	0.750388	0.0872384	5.51959	13.9661	1.04066	0.294821	2.0249	0.689142
Closed-Loop	Baseline	23.2741	10.5224	0.750388	0.0872384	5.51959	13.9661	0.982737	0.289306	1.96072	0.702919
Closed-Loop	Baseline	23.2741	10.5224	0.750388	0.0872384	5.51959	13.9661	1.06387	0.348516	2.33847	0.669807
Closed-Loop	Baseline	15.7033	13.7169	0.89556	0.0528418	6.99752	14.5453	0.951638	0.296821	2.12563	0.656208
Closed-Loop	Baseline	15.7033	13.7169	0.89556	0.0528418	6.99752	14.5453	1.08418	0.227454	2.06618	0.65971
Closed-Loop	Baseline	15.7033	13.7169	0.89556	0.0528418	6.99752	14.5453	0.894878	0.303779	1.61871	0.750514
Closed-Loop	Baseline	15.7033	13.7169	0.89556	0.0528418	6.99752	14.5453	0.746823	0.352443	1.88643	0.697782
Closed-Loop	Baseline	15.7033	13.7169	0.89556	0.0528418	6.99752	14.5453	0.977289	0.298539	2.2696	0.768923
Closed-Loop	Baseline	15.7033	13.7169	0.89556	0.0528418	6.99752	14.5453	0.985824	0.338756	2.01131	0.666424
Closed-Loop	Baseline	15.7033	13.7169	0.89556	0.0528418	6.99752	14.5453	1.01356	0.247724	2.19786	0.697261
Closed-Loop	Baseline	15.7033	13.7169	0.89556	0.0528418	6.99752	14.5453	1.07285	0.298687	2.52995	0.653879
Closed-Loop	Baseline	15.7033	13.7169	0.89556	0.0528418	6.99752	14.5453	1.06376	0.268774	2.31158	0.700368
Closed-Loop	Baseline	15.7033	13.7169	0.89556	0.0528418	6.99752	14.5453	1.02588	0.337349	2.02795	0.626073
Closed-Loop	Baseline	15.7033	13.7169	0.89556	0.0528418	6.99752	14.5453	1.11955	0.301575	1.8467	0.675618
Closed-Loop	Baseline	15.7033	13.7169	0.89556	0.0528418	6.99752	14.5453	0.848103	0.334504	1.23394	0.628187
Closed-Loop	Baseline	15.7033	13.7169	0.89556	0.0528418	6.99752	14.5453	1.05046	0.354386	1.94948	0.734696
Closed-Loop	Baseline	15.7033	13.7169	0.89556	0.0528418	6.99752	14.5453	1.06265	0.334581	1.9022	0.735829
Closed-Loop	Baseline	15.7033	13.7169	0.89556	0.0528418	6.99752	14.5453	0.876044	0.313656	2.11711	0.613487
Closed-Loop	Baseline	15.7033	13.7169	0.89556	0.0528418	6.99752	14.5453	0.849713	0.250089	1.95383	0.766694
Closed-Loop	Baseline	15.7033	13.7169	0.89556	0.0528418	6.99752	14.5453	0.925406	0.299861	1.90388	0.824871
Closed-Loop	Baseline	15.7033	13.7169	0.89556	0.0528418	6.99752	14.5453	0.933846	0.273345	1.46618	0.7023
Closed-Loop	Baseline	15.7033	13.7169	0.89556	0.0528418	6.99752	14.5453	1.07534	0.282797	1.71801	0.667944
Closed-Loop	Baseline	15.7033	13.7169	0.89556	0.0528418	6.99752	14.5453	0.938546	0.281273	2.143	0.841217
Closed-Loop	Baseline	15.7033	13.7169	0.89556	0.0528418	6.99752	14.5453	0.914365	0.251004	2.51477	0.634052
Closed-Loop	Baseline	15.7033	13.7169	0.89556	0.0528418	6.99752	14.5453	0.938837	0.202133	1.97074	0.701005
Closed-Loop	Baseline	15.7033	13.7169	0.89556	0.0528418	6.99752	14.5453	1.11186	0.266593	2.09834	0.708981
Closed-Loop	Baseline	15.7033	13.7169	0.89556	0.0528418	6.99752	14.5453	1.0013	0.309669	2.28574	0.767257
Closed-Loop	Baseline	15.7033	13.7169	0.89556	0.0528418	6.99752	14.5453	0.982075	0.232591	1.75673	0.717987
Closed-Loop	Baseline	15.7033	13.7169	0.89556	0.0528418	6.99752	14.5453	0.988999	0.300784	2.11004	0.675068
Closed-Loop	Baseline	15.7033	13.7169	0.89556	0.0528418	6.99752	14.5453	1.12921	0.395013	1.77785	0.652441
Closed-Loop	Baseline	15.7033	13.7169	0.89556	0.0528418	6.99752	14.5453	0.925083	0.351153	2.25945	0.682909
Closed-Loop	Baseline	15.7033	13.7169	0.89556	0.0528418	6.99752	14.5453	1.13155	0.382177	2.04542	0.649654
Closed-Loop	Baseline	15.7033	13.7169	0.89556	0.0528418	6.99752	14.5453	1.02105	0.319556	2.08954	0.702391
Closed-Loop	Baseline	15.7033	13.7169	0.89556	0.0528418	6.99752	14.5453	0.983958	0.358375	1.76522	0.67179
Closed-Loop	Baseline	15.7033	13.7169	0.89556	0.0528418	6.99752	14.5453	1.25009	0.263802	2.21211	0.625298
Closed-Loop	Baseline	15.7033	13.7169	0.89556	0.0528418	6.99752	14.5453	0.894436	0.267783	2.62541	0.762757
Closed-Loop	Baseline	15.7033	13.7169	0.89556	0.0528418	6.99752	14.5453	0.964631	0.163043	1.69763	0.675116
Closed-Loop	Baseline	15.7033	13.7169	0.89556	0.0528418	6.99752	14.5453	0.876757	0.359307	1.89807	0.636593
Closed-Loop	Baseline	15.7033	13.7169	0.89556	0.0528418	6.99752	14.5453	1.09525	0.377016	2.06948	0.691587
Closed-Loop	Baseline	15.7033	13.7169	0.89556	0.0528418	6.99752	14.5453	1.16892	0.272341	2.23592	0.703419
Closed-Loop	Baseline	15.7033	13.7169	0.89556	0.0528418	6.99752	14.5453	1.16699	0.287302	1.83214	0.612677
Closed-Loop	Baseline	15.7033	13.7169	0.89556	0.0528418	6.99752	14.5453	1.12239	0.262307	1.15009	0.716582
Closed-Loop	Baseline	15.7033	13.7169	0.89556	0.0528418	6.99752	14.5453	0.980238	0.319133	2.40776	0.647642
Closed-Loop	Baseline	15.7033	13.7169	0.89556	0.0528418	6.99752	14.5453	0.963476	0.356247	2.22815	0.785551
Closed-Loop	Baseline	15.7033	13.7169	0.89556	0.0528418	6.99752	14.5453	0.832883	0.212861	1.47712	0.726198
Closed-Loop	Baseline	15.7033	13.7169	0.89556	0.0528418	6.99752	14.5453	1.20359	0.320472	1.81773	0.680005
Closed-Loop	Baseline	15.7033	13.7169	0.89556	0.0528418	6.99752	14.5453	1.0469	0.286166	2.47045	0.662742
Closed-Loop	Baseline	15.7033	13.7169	0.89556	0.0528418	6.99752	14.5453	0.950804	0.30567	2.43434	0.694752
Closed-Loop	Baseline	15.7033	13.7169	0.89556	0.0528418	6.99752	14.5453	1.13281	0.32295	2.28159	0.73064
Closed-Loop	Baseline	15.7033	13.7169	0.89556	0.0528418	6.99752	14.5453	0.902724	0.29059	1.94717	0.698725
Closed-Loop	Baseline	15.7033	13.7169	0.89556	0.0528418	6.99752	14.5453	1.04066	0.294821	2.0249	0.689142
Closed-Loop	Baseline	15.7033	13.7169	0.89556	0.0528418	6.99752	14.5453	0.982737	0.289306	1.96072	0.702919
Closed-Loop	Baseline	15.7033	13.7169	0.89556	0.0528418	6.99752	14.5453	1.06387	0.348516	2.33847	0.669807
Closed-Loop	Baseline	20.3629	17.0966	0.957969	0.0338331	6.80054	17.0488	0.951638	0.296821	2.12563	0.656208
Closed-Loop	Baseline	20.3629	17.0966	0.957969	0.0338331	6.80054	17.0488	1.08418	0.227454	2.06618	0.65971
Closed-Loop	Baseline	20.3629	17.0966	0.957969	0.0338331	6.80054	17.0488	0.894878	0.303779	1.61871	0.750514
Closed-Loop	Baseline	20.3629	17.0966	0.957969	0.0338331	6.80054	17.0488	0.746823	0.352443	1.88643	0.697782
Closed-Loop	Baseline	20.3629	17.0966	0.957969	0.0338331	6.80054	17.0488	0.977289	0.298539	2.2696	0.768923
Closed-Loop	Baseline	20.3629	17.0966	0.957969	0.0338331	6.80054	17.0488	0.985824	0.338756	2.01131	0.666424
Closed-Loop	Baseline	20.3629	17.0966	0.957969	0.0338331	6.80054	17.0488	1.01356	0.247724	2.19786	0.697261
Closed-Loop	Baseline	20.3629	17.0966	0.957969	0.0338331	6.80054	17.0488	1.07285	0.298687	2.52995	0.653879
Closed-Loop	Baseline	20.3629	17.0966	0.957969	0.0338331	6.80054	17.0488	1.06376	0.268774	2.31158	0.700368
Closed-Loop	Baseline	20.3629	17.0966	0.957969	0.0338331	6.80054	17.0488	1.02588	0.337349	2.02795	0.626073
Closed-Loop	Baseline	20.3629	17.0966	0.957969	0.0338331	6.80054	17.0488	1.11955	0.301575	1.8467	0.675618
Closed-Loop	Baseline	20.3629	17.0966	0.957969	0.0338331	6.80054	17.0488	0.848103	0.334504	1.23394	0.628187
Closed-Loop	Baseline	20.3629	17.0966	0.957969	0.0338331	6.80054	17.0488	1.05046	0.354386	1.94948	0.734696
Closed-Loop	Baseline	20.3629	17.0966	0.957969	0.0338331	6.80054	17.0488	1.06265	0.334581	1.9022	0.735829
Closed-Loop	Baseline	20.3629	17.0966	0.957969	0.0338331	6.80054	17.0488	0.876044	0.313656	2.11711	0.613487
Closed-Loop	Baseline	20.3629	17.0966	0.957969	0.0338331	6.80054	17.0488	0.849713	0.250089	1.95383	0.766694
Closed-Loop	Baseline	20.3629	17.0966	0.957969	0.0338331	6.80054	17.0488	0.925406	0.299861	1.90388	0.824871
Closed-Loop	Baseline	20.3629	17.0966	0.957969	0.0338331	6.80054	17.0488	0.933846	0.273345	1.46618	0.7023
Closed-Loop	Baseline	20.3629	17.0966	0.957969	0.0338331	6.80054	17.0488	1.07534	0.282797	1.71801	0.667944
Closed-Loop	Baseline	20.3629	17.0966	0.957969	0.0338331	6.80054	17.0488	0.938546	0.281273	2.143	0.841217
Closed-Loop	Baseline	20.3629	17.0966	0.957969	0.0338331	6.80054	17.0488	0.914365	0.251004	2.51477	0.634052
Closed-Loop	Baseline	20.3629	17.0966	0.957969	0.0338331	6.80054	17.0488	0.938837	0.202133	1.97074	0.701005
Closed-Loop	Baseline	20.3629	17.0966	0.957969	0.0338331	6.80054	17.0488	1.11186	0.266593	2.09834	0.708981
Closed-Loop	Baseline	20.3629	17.0966	0.957969	0.0338331	6.80054	17.0488	1.0013	0.309669	2.28574	0.767257
Closed-Loop	Baseline	20.3629	17.0966	0.957969	0.0338331	6.80054	17.0488	0.982075	0.232591	1.75673	0.717987
Closed-Loop	Baseline	20.3629	17.0966	0.957969	0.0338331	6.80054	17.0488	0.988999	0.300784	2.11004	0.675068
Closed-Loop	Baseline	20.3629	17.0966	0.957969	0.0338331	6.80054	17.0488	1.12921	0.395013	1.77785	0.652441
Closed-Loop	Baseline	20.3629	17.0966	0.957969	0.0338331	6.80054	17.0488	0.925083	0.351153	2.25945	0.682909
Closed-Loop	Baseline	20.3629	17.0966	0.957969	0.0338331	6.80054	17.0488	1.13155	0.382177	2.04542	0.649654
Closed-Loop	Baseline	20.3629	17.0966	0.957969	0.0338331	6.80054	17.0488	1.02105	0.319556	2.08954	0.702391
Closed-Loop	Baseline	20.3629	17.0966	0.957969	0.0338331	6.80054	17.0488	0.983958	0.358375	1.76522	0.67179
Closed-Loop	Baseline	20.3629	17.0966	0.957969	0.0338331	6.80054	17.0488	1.25009	0.263802	2.21211	0.625298
Closed-Loop	Baseline	20.3629	17.0966	0.957969	0.0338331	6.80054	17.0488	0.894436	0.267783	2.62541	0.762757
Closed-Loop	Baseline	20.3629	17.0966	0.957969	0.0338331	6.80054	17.0488	0.964631	0.163043	1.69763	0.675116
Closed-Loop	Baseline	20.3629	17.0966	0.957969	0.0338331	6.80054	17.0488	0.876757	0.359307	1.89807	0.636593
Closed-Loop	Baseline	20.3629	17.0966	0.957969	0.0338331	6.80054	17.0488	1.09525	0.377016	2.06948	0.691587
Closed-Loop	Baseline	20.3629	17.0966	0.957969	0.0338331	6.80054	17.0488	1.16892	0.272341	2.23592	0.703419
Closed-Loop	Baseline	20.3629	17.0966	0.957969	0.0338331	6.80054	17.0488	1.16699	0.287302	1.83214	0.612677
Closed-Loop	Baseline	20.3629	17.0966	0.957969	0.0338331	6.80054	17.0488	1.12239	0.262307	1.15009	0.716582
Closed-Loop	Baseline	20.3629	17.0966	0.957969	0.0338331	6.80054	17.0488	0.980238	0.319133	2.40776	0.647642
Closed-Loop	Baseline	20.3629	17.0966	0.957969	0.0338331	6.80054	17.0488	0.963476	0.356247	2.22815	0.785551
Closed-Loop	Baseline	20.3629	17.0966	0.957969	0.0338331	6.80054	17.0488	0.832883	0.212861	1.47712	0.726198
Closed-Loop	Baseline	20.3629	17.0966	0.957969	0.0338331	6.80054	17.0488	1.20359	0.320472	1.81773	0.680005
Closed-Loop	Baseline	20.3629	17.0966	0.957969	0.0338331	6.80054	17.0488	1.0469	0.286166	2.47045	0.662742
Closed-Loop	Baseline	20.3629	17.0966	0.957969	0.0338331	6.80054	17.0488	0.950804	0.30567	2.43434	0.694752
Closed-Loop	Baseline	20.3629	17.0966	0.957969	0.0338331	6.80054	17.0488	1.13281	0.32295	2.28159	0.73064
Closed-Loop	Baseline	20.3629	17.0966	0.957969	0.0338331	6.80054	17.0488	0.902724	0.29059	1.94717	0.698725
Closed-Loop	Baseline	20.3629	17.0966	0.957969	0.0338331	6.80054	17.0488	1.04066	0.294821	2.0249	0.689142
Closed-Loop	Baseline	20.3629	17.0966	0.957969	0.0338331	6.80054	17.0488	0.982737	0.289306	1.96072	0.702919
Closed-Loop	Baseline	20.3629	17.0966	0.957969	0.0338331	6.80054	17.0488	1.06387	0.348516	2.33847	0.669807
Closed-Loop	Baseline	32.0105	17.6272	1.10355	0.0691532	5.58159	8.19557	0.951638	0.296821	2.12563	0.656208
Closed-Loop	Baseline	32.0105	17.6272	1.10355	0.0691532	5.58159	8.19557	1.08418	0.227454	2.06618	0.65971
Closed-Loop	Baseline	32.0105	17.6272	1.10355	0.0691532	5.58159	8.19557	0.894878	0.303779	1.61871	0.750514
Closed-Loop	Baseline	32.0105	17.6272	1.10355	0.0691532	5.58159	8.19557	0.746823	0.352443	1.88643	0.697782
Closed-Loop	Baseline	32.0105	17.6272	1.10355	0.0691532	5.58159	8.19557	0.977289	0.298539	2.2696	0.768923
Closed-Loop	Baseline	32.0105	17.6272	1.10355	0.0691532	5.58159	8.19557	0.985824	0.338756	2.01131	0.666424
Closed-Loop	Baseline	32.0105	17.6272	1.10355	0.0691532	5.58159	8.19557	1.01356	0.247724	2.19786	0.697261
Closed-Loop	Baseline	32.0105	17.6272	1.10355	0.0691532	5.58159	8.19557	1.07285	0.298687	2.52995	0.653879
Closed-Loop	Baseline	32.0105	17.6272	1.10355	0.0691532	5.58159	8.19557	1.06376	0.268774	2.31158	0.700368
Closed-Loop	Baseline	32.0105	17.6272	1.10355	0.0691532	5.58159	8.19557	1.02588	0.337349	2.02795	0.626073
Closed-Loop	Baseline	32.0105	17.6272	1.10355	0.0691532	5.58159	8.19557	1.11955	0.301575	1.8467	0.675618
Closed-Loop	Baseline	32.0105	17.6272	1.10355	0.0691532	5.58159	8.19557	0.848103	0.334504	1.23394	0.628187
Closed-Loop	Baseline	32.0105	17.6272	1.10355	0.0691532	5.58159	8.19557	1.05046	0.354386	1.94948	0.734696
Closed-Loop	Baseline	32.0105	17.6272	1.10355	0.0691532	5.58159	8.19557	1.06265	0.334581	1.9022	0.735829
Closed-Loop	Baseline	32.0105	17.6272	1.10355	0.0691532	5.58159	8.19557	0.876044	0.313656	2.11711	0.613487
Closed-Loop	Baseline	32.0105	17.6272	1.10355	0.0691532	5.58159	8.19557	0.849713	0.250089	1.95383	0.766694
Closed-Loop	Baseline	32.0105	17.6272	1.10355	0.0691532	5.58159	8.19557	0.925406	0.299861	1.90388	0.824871
Closed-Loop	Baseline	32.0105	17.6272	1.10355	0.0691532	5.58159	8.19557	0.933846	0.273345	1.46618	0.7023
Closed-Loop	Baseline	32.0105	17.6272	1.10355	0.0691532	5.58159	8.19557	1.07534	0.282797	1.71801	0.667944
Closed-Loop	Baseline	32.0105	17.6272	1.10355	0.0691532	5.58159	8.19557	0.938546	0.281273	2.143	0.841217
Closed-Loop	Baseline	32.0105	17.6272	1.10355	0.0691532	5.58159	8.19557	0.914365	0.251004	2.51477	0.634052
Closed-Loop	Baseline	32.0105	17.6272	1.10355	0.0691532	5.58159	8.19557	0.938837	0.202133	1.97074	0.701005
Closed-Loop	Baseline	32.0105	17.6272	1.10355	0.0691532	5.58159	8.19557	1.11186	0.266593	2.09834	0.708981
Closed-Loop	Baseline	32.0105	17.6272	1.10355	0.0691532	5.58159	8.19557	1.0013	0.309669	2.28574	0.767257
Closed-Loop	Baseline	32.0105	17.6272	1.10355	0.0691532	5.58159	8.19557	0.982075	0.232591	1.75673	0.717987
Closed-Loop	Baseline	32.0105	17.6272	1.10355	0.0691532	5.58159	8.19557	0.988999	0.300784	2.11004	0.675068
Closed-Loop	Baseline	32.0105	17.6272	1.10355	0.0691532	5.58159	8.19557	1.12921	0.395013	1.77785	0.652441
Closed-Loop	Baseline	32.0105	17.6272	1.10355	0.0691532	5.58159	8.19557	0.925083	0.351153	2.25945	0.682909
Closed-Loop	Baseline	32.0105	17.6272	1.10355	0.0691532	5.58159	8.19557	1.13155	0.382177	2.04542	0.649654
Closed-Loop	Baseline	32.0105	17.6272	1.10355	0.0691532	5.58159	8.19557	1.02105	0.319556	2.08954	0.702391
Closed-Loop	Baseline	32.0105	17.6272	1.10355	0.0691532	5.58159	8.19557	0.983958	0.358375	1.76522	0.67179
Closed-Loop	Baseline	32.0105	17.6272	1.10355	0.0691532	5.58159	8.19557	1.25009	0.263802	2.21211	0.625298
Closed-Loop	Baseline	32.0105	17.6272	1.10355	0.0691532	5.58159	8.19557	0.894436	0.267783	2.62541	0.762757
Closed-Loop	Baseline	32.0105	17.6272	1.10355	0.0691532	5.58159	8.19557	0.964631	0.163043	1.69763	0.675116
Closed-Loop	Baseline	32.0105	17.6272	1.10355	0.0691532	5.58159	8.19557	0.876757	0.359307	1.89807	0.636593
Closed-Loop	Baseline	32.0105	17.6272	1.10355	0.0691532	5.58159	8.19557	1.09525	0.377016	2.06948	0.691587
Closed-Loop	Baseline	32.0105	17.6272	1.10355	0.0691532	5.58159	8.19557	1.16892	0.272341	2.23592	0.703419
Closed-Loop	Baseline	32.0105	17.6272	1.10355	0.0691532	5.58159	8.19557	1.16699	0.287302	1.83214	0.612677
Closed-Loop	Baseline	32.0105	17.6272	1.10355	0.0691532	5.58159	8.19557	1.12239	0.262307	1.15009	0.716582
Closed-Loop	Baseline	32.0105	17.6272	1.10355	0.0691532	5.58159	8.19557	0.980238	0.319133	2.40776	0.647642
Closed-Loop	Baseline	32.0105	17.6272	1.10355	0.0691532	5.58159	8.19557	0.963476	0.356247	2.22815	0.785551
Closed-Loop	Baseline	32.0105	17.6272	1.10355	0.0691532	5.58159	8.19557	0.832883	0.212861	1.47712	0.726198
Closed-Loop	Baseline	32.0105	17.6272	1.10355	0.0691532	5.58159	8.19557	1.20359	0.320472	1.81773	0.680005
Closed-Loop	Baseline	32.0105	17.6272	1.10355	0.0691532	5.58159	8.19557	1.0469	0.286166	2.47045	0.662742
Closed-Loop	Baseline	32.0105	17.6272	1.10355	0.0691532	5.58159	8.19557	0.950804	0.30567	2.43434	0.694752
Closed-Loop	Baseline	32.0105	17.6272	1.10355	0.0691532	5.58159	8.19557	1.13281	0.32295	2.28159	0.73064
Closed-Loop	Baseline	32.0105	17.6272	1.10355	0.0691532	5.58159	8.19557	0.902724	0.29059	1.94717	0.698725
Closed-Loop	Baseline	32.0105	17.6272	1.10355	0.0691532	5.58159	8.19557	1.04066	0.294821	2.0249	0.689142
Closed-Loop	Baseline	32.0105	17.6272	1.10355	0.0691532	5.58159	8.19557	0.982737	0.289306	1.96072	0.702919
Closed-Loop	Baseline	32.0105	17.6272	1.10355	0.0691532	5.58159	8.19557	1.06387	0.348516	2.33847	0.669807
Closed-Loop	Baseline	13.2159	16.7703	1.34271	0.0517933	4.95483	18.2634	0.951638	0.296821	2.12563	0.656208
Closed-Loop	Baseline	13.2159	16.7703	1.34271	0.0517933	4.95483	18.2634	1.08418	0.227454	2.06618	0.65971
Closed-Loop	Baseline	13.2159	16.7703	1.34271	0.0517933	4.95483	18.2634	0.894878	0.303779	1.61871	0.750514
Closed-Loop	Baseline	13.2159	16.7703	1.34271	0.0517933	4.95483	18.2634	0.746823	0.352443	1.88643	0.697782
Closed-Loop	Baseline	13.2159	16.7703	1.34271	0.0517933	4.95483	18.2634	0.977289	0.298539	2.2696	0.768923
Closed-Loop	Baseline	13.2159	16.7703	1.34271	0.0517933	4.95483	18.2634	0.985824	0.338756	2.01131	0.666424
Closed-Loop	Baseline	13.2159	16.7703	1.34271	0.0517933	4.95483	18.2634	1.01356	0.247724	2.19786	0.697261
Closed-Loop	Baseline	13.2159	16.7703	1.34271	0.0517933	4.95483	18.2634	1.07285	0.298687	2.52995	0.653879
Closed-Loop	Baseline	13.2159	16.7703	1.34271	0.0517933	4.95483	18.2634	1.06376	0.268774	2.31158	0.700368
Closed-Loop	Baseline	13.2159	16.7703	1.34271	0.0517933	4.95483	18.2634	1.02588	0.337349	2.02795	0.626073
Closed-Loop	Baseline	13.2159	16.7703	1.34271	0.0517933	4.95483	18.2634	1.11955	0.301575	1.8467	0.675618
Closed-Loop	Baseline	13.2159	16.7703	1.34271	0.0517933	4.95483	18.2634	0.848103	0.334504	1.23394	0.628187
Closed-Loop	Baseline	13.2159	16.7703	1.34271	0.0517933	4.95483	18.2634	1.05046	0.354386	1.94948	0.734696
Closed-Loop	Baseline	13.2159	16.7703	1.34271	0.0517933	4.95483	18.2634	1.06265	0.334581	1.9022	0.735829
Closed-Loop	Baseline	13.2159	16.7703	1.34271	0.0517933	4.95483	18.2634	0.876044	0.313656	2.11711	0.613487
Closed-Loop	Baseline	13.2159	16.7703	1.34271	0.0517933	4.95483	18.2634	0.849713	0.250089	1.95383	0.766694
Closed-Loop	Baseline	13.2159	16.7703	1.34271	0.0517933	4.95483	18.2634	0.925406	0.299861	1.90388	0.824871
Closed-Loop	Baseline	13.2159	16.7703	1.34271	0.0517933	4.95483	18.2634	0.933846	0.273345	1.46618	0.7023
Closed-Loop	Baseline	13.2159	16.7703	1.34271	0.0517933	4.95483	18.2634	1.07534	0.282797	1.71801	0.667944
Closed-Loop	Baseline	13.2159	16.7703	1.34271	0.0517933	4.95483	18.2634	0.938546	0.281273	2.143	0.841217
Closed-Loop	Baseline	13.2159	16.7703	1.34271	0.0517933	4.95483	18.2634	0.914365	0.251004	2.51477	0.634052
Closed-Loop	Baseline	13.2159	16.7703	1.34271	0.0517933	4.95483	18.2634	0.938837	0.202133	1.97074	0.701005
Closed-Loop	Baseline	13.2159	16.7703	1.34271	0.0517933	4.95483	18.2634	1.11186	0.266593	2.09834	0.708981
Closed-Loop	Baseline	13.2159	16.7703	1.34271	0.0517933	4.95483	18.2634	1.0013	0.309669	2.28574	0.767257
Closed-Loop	Baseline	13.2159	16.7703	1.34271	0.0517933	4.95483	18.2634	0.982075	0.232591	1.75673	0.717987
Closed-Loop	Baseline	13.2159	16.7703	1.34271	0.0517933	4.95483	18.2634	0.988999	0.300784	2.11004	0.675068
Closed-Loop	Baseline	13.2159	16.7703	1.34271	0.0517933	4.95483	18.2634	1.12921	0.395013	1.77785	0.652441
Closed-Loop	Baseline	13.2159	16.7703	1.34271	0.0517933	4.95483	18.2634	0.925083	0.351153	2.25945	0.682909
Closed-Loop	Baseline	13.2159	16.7703	1.34271	0.0517933	4.95483	18.2634	1.13155	0.382177	2.04542	0.649654
Closed-Loop	Baseline	13.2159	16.7703	1.34271	0.0517933	4.95483	18.2634	1.02105	0.319556	2.08954	0.702391
Closed-Loop	Baseline	13.2159	16.7703	1.34271	0.0517933	4.95483	18.2634	0.983958	0.358375	1.76522	0.67179
Closed-Loop	Baseline	13.2159	16.7703	1.34271	0.0517933	4.95483	18.2634	1.25009	0.263802	2.21211	0.625298
Closed-Loop	Baseline	13.2159	16.7703	1.34271	0.0517933	4.95483	18.2634	0.894436	0.267783	2.62541	0.762757
Closed-Loop	Baseline	13.2159	16.7703	1.34271	0.0517933	4.95483	18.2634	0.964631	0.163043	1.69763	0.675116
Closed-Loop	Baseline	13.2159	16.7703	1.34271	0.0517933	4.95483	18.2634	0.876757	0.359307	1.89807	0.636593
Closed-Loop	Baseline	13.2159	16.7703	1.34271	0.0517933	4.95483	18.2634	1.09525	0.377016	2.06948	0.691587
Closed-Loop	Baseline	13.2159	16.7703	1.34271	0.0517933	4.95483	18.2634	1.16892	0.272341	2.23592	0.703419
Closed-Loop	Baseline	13.2159	16.7703	1.34271	0.0517933	4.95483	18.2634	1.16699	0.287302	1.83214	0.612677
Closed-Loop	Baseline	13.2159	16.7703	1.34271	0.0517933	4.95483	18.2634	1.12239	0.262307	1.15009	0.716582
Closed-Loop	Baseline	13.2159	16.7703	1.34271	0.0517933	4.95483	18.2634	0.980238	0.319133	2.40776	0.647642
Closed-Loop	Baseline	13.2159	16.7703	1.34271	0.0517933	4.95483	18.2634	0.963476	0.356247	2.22815	0.785551
Closed-Loop	Baseline	13.2159	16.7703	1.34271	0.0517933	4.95483	18.2634	0.832883	0.212861	1.47712	0.726198
Closed-Loop	Baseline	13.2159	16.7703	1.34271	0.0517933	4.95483	18.2634	1.20359	0.320472	1.81773	0.680005
Closed-Loop	Baseline	13.2159	16.7703	1.34271	0.0517933	4.95483	18.2634	1.0469	0.286166	2.47045	0.662742
Closed-Loop	Baseline	13.2159	16.7703	1.34271	0.0517933	4.95483	18.2634	0.950804	0.30567	2.43434	0.694752
Closed-Loop	Baseline	13.2159	16.7703	1.34271	0.0517933	4.95483	18.2634	1.13281	0.32295	2.28159	0.73064
Closed-Loop	Baseline	13.2159	16.7703	1.34271	0.0517933	4.95483	18.2634	0.902724	0.29059	1.94717	0.698725
Closed-Loop	Baseline	13.2159	16.7703	1.34271	0.0517933	4.95483	18.2634	1.04066	0.294821	2.0249	0.689142
Closed-Loop	Baseline	13.2159	16.7703	1.34271	0.0517933	4.95483	18.2634	0.982737	0.289306	1.96072	0.702919
Closed-Loop	Baseline	13.2159	16.7703	1.34271	0.0517933	4.95483	18.2634	1.06387	0.348516	2.33847	0.669807
Closed-Loop	Baseline	21.283	17.567	0.983896	0.0686852	6.08705	10.2465	0.951638	0.296821	2.12563	0.656208
Closed-Loop	Baseline	21.283	17.567	0.983896	0.0686852	6.08705	10.2465	1.08418	0.227454	2.06618	0.65971
Closed-Loop	Baseline	21.283	17.567	0.983896	0.0686852	6.08705	10.2465	0.894878	0.303779	1.61871	0.750514
Closed-Loop	Baseline	21.283	17.567	0.983896	0.0686852	6.08705	10.2465	0.746823	0.352443	1.88643	0.697782
Closed-Loop	Baseline	21.283	17.567	0.983896	0.0686852	6.08705	10.2465	0.977289	0.298539	2.2696	0.768923
Closed-Loop	Baseline	21.283	17.567	0.983896	0.0686852	6.08705	10.2465	0.985824	0.338756	2.01131	0.666424
Closed-Loop	Baseline	21.283	17.567	0.983896	0.0686852	6.08705	10.2465	1.01356	0.247724	2.19786	0.697261
Closed-Loop	Baseline	21.283	17.567	0.983896	0.0686852	6.08705	10.2465	1.07285	0.298687	2.52995	0.653879
Closed-Loop	Baseline	21.283	17.567	0.983896	0.0686852	6.08705	10.2465	1.06376	0.268774	2.31158	0.700368
Closed-Loop	Baseline	21.283	17.567	0.983896	0.0686852	6.08705	10.2465	1.02588	0.337349	2.02795	0.626073
Closed-Loop	Baseline	21.283	17.567	0.983896	0.0686852	6.08705	10.2465	1.11955	0.301575	1.8467	0.675618
Closed-Loop	Baseline	21.283	17.567	0.983896	0.0686852	6.08705	10.2465	0.848103	0.334504	1.23394	0.628187
Closed-Loop	Baseline	21.283	17.567	0.983896	0.0686852	6.08705	10.2465	1.05046	0.354386	1.94948	0.734696
Closed-Loop	Baseline	21.283	17.567	0.983896	0.0686852	6.08705	10.2465	1.06265	0.334581	1.9022	0.735829
Closed-Loop	Baseline	21.283	17.567	0.983896	0.0686852	6.08705	10.2465	0.876044	0.313656	2.11711	0.613487
Closed-Loop	Baseline	21.283	17.567	0.983896	0.0686852	6.08705	10.2465	0.849713	0.250089	1.95383	0.766694
Closed-Loop	Baseline	21.283	17.567	0.983896	0.0686852	6.08705	10.2465	0.925406	0.299861	1.90388	0.824871
Closed-Loop	Baseline	21.283	17.567	0.983896	0.0686852	6.08705	10.2465	0.933846	0.273345	1.46618	0.7023
Closed-Loop	Baseline	21.283	17.567	0.983896	0.0686852	6.08705	10.2465	1.07534	0.282797	1.71801	0.667944
Closed-Loop	Baseline	21.283	17.567	0.983896	0.0686852	6.08705	10.2465	0.938546	0.281273	2.143	0.841217
Closed-Loop	Baseline	21.283	17.567	0.983896	0.0686852	6.08705	10.2465	0.914365	0.251004	2.51477	0.634052
Closed-Loop	Baseline	21.283	17.567	0.983896	0.0686852	6.08705	10.2465	0.938837	0.202133	1.97074	0.701005
Closed-Loop	Baseline	21.283	17.567	0.983896	0.0686852	6.08705	10.2465	1.11186	0.266593	2.09834	0.708981
Closed-Loop	Baseline	21.283	17.567	0.983896	0.0686852	6.08705	10.2465	1.0013	0.309669	2.28574	0.767257
Closed-Loop	Baseline	21.283	17.567	0.983896	0.0686852	6.08705	10.2465	0.982075	0.232591	1.75673	0.717987
Closed-Loop	Baseline	21.283	17.567	0.983896	0.0686852	6.08705	10.2465	0.988999	0.300784	2.11004	0.675068
Closed-Loop	Baseline	21.283	17.567	0.983896	0.0686852	6.08705	10.2465	1.12921	0.395013	1.77785	0.652441
Closed-Loop	Baseline	21.283	17.567	0.983896	0.0686852	6.08705	10.2465	0.925083	0.351153	2.25945	0.682909
Closed-Loop	Baseline	21.283	17.567	0.983896	0.0686852	6.08705	10.2465	1.13155	0.382177	2.04542	0.649654
Closed-Loop	Baseline	21.283	17.567	0.983896	0.0686852	6.08705	10.2465	1.02105	0.319556	2.08954	0.702391
Closed-Loop	Baseline	21.283	17.567	0.983896	0.0686852	6.08705	10.2465	0.983958	0.358375	1.76522	0.67179
Closed-Loop	Baseline	21.283	17.567	0.983896	0.0686852	6.08705	10.2465	1.25009	0.263802	2.21211	0.625298
Closed-Loop	Baseline	21.283	17.567	0.983896	0.0686852	6.08705	10.2465	0.894436	0.267783	2.62541	0.762757
Closed-Loop	Baseline	21.283	17.567	0.983896	0.0686852	6.08705	10.2465	0.964631	0.163043	1.69763	0.675116
Closed-Loop	Baseline	21.283	17.567	0.983896	0.0686852	6.08705	10.2465	0.876757	0.359307	1.89807	0.636593
Closed-Loop	Baseline	21.283	17.567	0.983896	0.0686852	6.08705	10.2465	1.09525	0.377016	2.06948	0.691587
Closed-Loop	Baseline	21.283	17.567	0.983896	0.0686852	6.08705	10.2465	1.16892	0.272341	2.23592	0.703419
Closed-Loop	Baseline	21.283	17.567	0.983896	0.0686852	6.08705	10.2465	1.16699	0.287302	1.83214	0.612677
Closed-Loop	Baseline	21.283	17.567	0.983896	0.0686852	6.08705	10.2465	1.12239	0.262307	1.15009	0.716582
Closed-Loop	Baseline	21.283	17.567	0.983896	0.0686852	6.08705	10.2465	0.980238	0.319133	2.40776	0.647642
Closed-Loop	Baseline	21.283	17.567	0.983896	0.0686852	6.08705	10.2465	0.963476	0.356247	2.22815	0.785551
Closed-Loop	Baseline	21.283	17.567	0.983896	0.0686852	6.08705	10.2465	0.832883	0.212861	1.47712	0.726198
Closed-Loop	Baseline	21.283	17.567	0.983896	0.0686852	6.08705	10.2465	1.20359	0.320472	1.81773	0.680005
Closed-Loop	Baseline	21.283	17.567	0.983896	0.0686852	6.08705	10.2465	1.0469	0.286166	2.47045	0.662742
Closed-Loop	Baseline	21.283	17.567	0.983896	0.0686852	6.08705	10.2465	0.950804	0.30567	2.43434	0.694752
Closed-Loop	Baseline	21.283	17.567	0.983896	0.0686852	6.08705	10.2465	1.13281	0.32295	2.28159	0.73064
Closed-Loop	Baseline	21.283	17.567	0.983896	0.0686852	6.08705	10.2465	0.902724	0.29059	1.94717	0.698725
Closed-Loop	Baseline	21.283	17.567	0.983896	0.0686852	6.08705	10.2465	1.04066	0.294821	2.0249	0.689142
Closed-Loop	Baseline	21.283	17.567	0.983896	0.0686852	6.08705	10.2465	0.982737	0.289306	1.96072	0.702919
Closed-Loop	Baseline	21.283	17.567	0.983896	0.0686852	6.08705	10.2465	1.06387	0.348516	2.33847	0.669807
Closed-Loop	Baseline	21.3845	16.4228	0.826144	0.0724232	8.73655	13.3107	0.951638	0.296821	2.12563	0.656208
Closed-Loop	Baseline	21.3845	16.4228	0.826144	0.0724232	8.73655	13.3107	1.08418	0.227454	2.06618	0.65971
Closed-Loop	Baseline	21.3845	16.4228	0.826144	0.0724232	8.73655	13.3107	0.894878	0.303779	1.61871	0.750514
Closed-Loop	Baseline	21.3845	16.4228	0.826144	0.0724232	8.73655	13.3107	0.746823	0.352443	1.88643	0.697782
Closed-Loop	Baseline	21.3845	16.4228	0.826144	0.0724232	8.73655	13.3107	0.977289	0.298539	2.2696	0.768923
Closed-Loop	Baseline	21.3845	16.4228	0.826144	0.0724232	8.73655	13.3107	0.985824	0.338756	2.01131	0.666424
Closed-Loop	Baseline	21.3845	16.4228	0.826144	0.0724232	8.73655	13.3107	1.01356	0.247724	2.19786	0.697261
Closed-Loop	Baseline	21.3845	16.4228	0.826144	0.0724232	8.73655	13.3107	1.07285	0.298687	2.52995	0.653879
Closed-Loop	Baseline	21.3845	16.4228	0.826144	0.0724232	8.73655	13.3107	1.06376	0.268774	2.31158	0.700368
Closed-Loop	Baseline	21.3845	16.4228	0.826144	0.0724232	8.73655	13.3107	1.02588	0.337349	2.02795	0.626073
Closed-Loop	Baseline	21.3845	16.4228	0.826144	0.0724232	8.73655	13.3107	1.11955	0.301575	1.8467	0.675618
Closed-Loop	Baseline	21.3845	16.4228	0.826144	0.0724232	8.73655	13.3107	0.848103	0.334504	1.23394	0.628187
Closed-Loop	Baseline	21.3845	16.4228	0.826144	0.0724232	8.73655	13.3107	1.05046	0.354386	1.94948	0.734696
Closed-Loop	Baseline	21.3845	16.4228	0.826144	0.0724232	8.73655	13.3107	1.06265	0.334581	1.9022	0.735829
Closed-Loop	Baseline	21.3845	16.4228	0.826144	0.0724232	8.73655	13.3107	0.876044	0.313656	2.11711	0.613487
Closed-Loop	Baseline	21.3845	16.4228	0.826144	0.0724232	8.73655	13.3107	0.849713	0.250089	1.95383	0.766694
Closed-Loop	Baseline	21.3845	16.4228	0.826144	0.0724232	8.73655	13.3107	0.925406	0.299861	1.90388	0.824871
Closed-Loop	Baseline	21.3845	16.4228	0.826144	0.0724232	8.73655	13.3107	0.933846	0.273345	1.46618	0.7023
Closed-Loop	Baseline	21.3845	16.4228	0.826144	0.0724232	8.73655	13.3107	1.07534	0.282797	1.71801	0.667944
Closed-Loop	Baseline	21.3845	16.4228	0.826144	0.0724232	8.73655	13.3107	0.938546	0.281273	2.143	0.841217
Closed-Loop	Baseline	21.3845	16.4228	0.826144	0.0724232	8.73655	13.3107	0.914365	0.251004	2.51477	0.634052
Closed-Loop	Baseline	21.3845	16.4228	0.826144	0.0724232	8.73655	13.3107	0.938837	0.202133	1.97074	0.701005
Closed-Loop	Baseline	21.3845	16.4228	0.826144	0.0724232	8.73655	13.3107	1.11186	0.266593	2.09834	0.708981
Closed-Loop	Baseline	21.3845	16.4228	0.826144	0.0724232	8.73655	13.3107	1.0013	0.309669	2.28574	0.767257
Closed-Loop	Baseline	21.3845	16.4228	0.826144	0.0724232	8.73655	13.3107	0.982075	0.232591	1.75673	0.717987
Closed-Loop	Baseline	21.3845	16.4228	0.826144	0.0724232	8.73655	13.3107	0.988999	0.300784	2.11004	0.675068
Closed-Loop	Baseline	21.3845	16.4228	0.826144	0.0724232	8.73655	13.3107	1.12921	0.395013	1.77785	0.652441
Closed-Loop	Baseline	21.3845	16.4228	0.826144	0.0724232	8.73655	13.3107	0.925083	0.351153	2.25945	0.682909
Closed-Loop	Baseline	21.3845	16.4228	0.826144	0.0724232	8.73655	13.3107	1.13155	0.382177	2.04542	0.649654
Closed-Loop	Baseline	21.3845	16.4228	0.826144	0.0724232	8.73655	13.3107	1.02105	0.319556	2.08954	0.702391
Closed-Loop	Baseline	21.3845	16.4228	0.826144	0.0724232	8.73655	13.3107	0.983958	0.358375	1.76522	0.67179
Closed-Loop	Baseline	21.3845	16.4228	0.826144	0.0724232	8.73655	13.3107	1.25009	0.263802	2.21211	0.625298
Closed-Loop	Baseline	21.3845	16.4228	0.826144	0.0724232	8.73655	13.3107	0.894436	0.267783	2.62541	0.762757
Closed-Loop	Baseline	21.3845	16.4228	0.826144	0.0724232	8.73655	13.3107	0.964631	0.163043	1.69763	0.675116
Closed-Loop	Baseline	21.3845	16.4228	0.826144	0.0724232	8.73655	13.3107	0.876757	0.359307	1.89807	0.636593
Closed-Loop	Baseline	21.3845	16.4228	0.826144	0.0724232	8.73655	13.3107	1.09525	0.377016	2.06948	0.691587
Closed-Loop	Baseline	21.3845	16.4228	0.826144	0.0724232	8.73655	13.3107	1.16892	0.272341	2.23592	0.703419
Closed-Loop	Baseline	21.3845	16.4228	0.826144	0.0724232	8.73655	13.3107	1.16699	0.287302	1.83214	0.612677
Closed-Loop	Baseline	21.3845	16.4228	0.826144	0.0724232	8.73655	13.3107	1.12239	0.262307	1.15009	0.716582
Closed-Loop	Baseline	21.3845	16.4228	0.826144	0.0724232	8.73655	13.3107	0.980238	0.319133	2.40776	0.647642
Closed-Loop	Baseline	21.3845	16.4228	0.826144	0.0724232	8.73655	13.3107	0.963476	0.356247	2.22815	0.785551
Closed-Loop	Baseline	21.3845	16.4228	0.826144	0.0724232	8.73655	13.3107	0.832883	0.212861	1.47712	0.726198
Closed-Loop	Baseline	21.3845	16.4228	0.826144	0.0724232	8.73655	13.3107	1.20359	0.320472	1.81773	0.680005
Closed-Loop	Baseline	21.3845	16.4228	0.826144	0.0724232	8.73655	13.3107	1.0469	0.286166	2.47045	0.662742
Closed-Loop	Baseline	21.3845	16.4228	0.826144	0.0724232	8.73655	13.3107	0.950804	0.30567	2.43434	0.694752
Closed-Loop	Baseline	21.3845	16.4228	0.826144	0.0724232	8.73655	13.3107	1.13281	0.32295	2.28159	0.73064
Closed-Loop	Baseline	21.3845	16.4228	0.826144	0.0724232	8.73655	13.3107	0.902724	0.29059	1.94717	0.698725
Closed-Loop	Baseline	21.3845	16.4228	0.826144	0.0724232	8.73655	13.3107	1.04066	0.294821	2.0249	0.689142
Closed-Loop	Baseline	21.3845	16.4228	0.826144	0.0724232	8.73655	13.3107	0.982737	0.289306	1.96072	0.702919
Closed-Loop	Baseline	21.3845	16.4228	0.826144	0.0724232	8.73655	13.3107	1.06387	0.348516	2.33847	0.669807
Closed-Loop	Baseline	25.0219	12.7768	0.896517	0.075386	3.92296	12.9396	0.951638	0.296821	2.12563	0.656208
Closed-Loop	Baseline	25.0219	12.7768	0.896517	0.075386	3.92296	12.9396	1.08418	0.227454	2.06618	0.65971
Closed-Loop	Baseline	25.0219	12.7768	0.896517	0.075386	3.92296	12.9396	0.894878	0.303779	1.61871	0.750514
Closed-Loop	Baseline	25.0219	12.7768	0.896517	0.075386	3.92296	12.9396	0.746823	0.352443	1.88643	0.697782
Closed-Loop	Baseline	25.0219	12.7768	0.896517	0.075386	3.92296	12.9396	0.977289	0.298539	2.2696	0.768923
Closed-Loop	Baseline	25.0219	12.7768	0.896517	0.075386	3.92296	12.9396	0.985824	0.338756	2.01131	0.666424
Closed-Loop	Baseline	25.0219	12.7768	0.896517	0.075386	3.92296	12.9396	1.01356	0.247724	2.19786	0.697261
Closed-Loop	Baseline	25.0219	12.7768	0.896517	0.075386	3.92296	12.9396	1.07285	0.298687	2.52995	0.653879
Closed-Loop	Baseline	25.0219	12.7768	0.896517	0.075386	3.92296	12.9396	1.06376	0.268774	2.31158	0.700368
Closed-Loop	Baseline	25.0219	12.7768	0.896517	0.075386	3.92296	12.9396	1.02588	0.337349	2.02795	0.626073
Closed-Loop	Baseline	25.0219	12.7768	0.896517	0.075386	3.92296	12.9396	1.11955	0.301575	1.8467	0.675618
Closed-Loop	Baseline	25.0219	12.7768	0.896517	0.075386	3.92296	12.9396	0.848103	0.334504	1.23394	0.628187
Closed-Loop	Baseline	25.0219	12.7768	0.896517	0.075386	3.92296	12.9396	1.05046	0.354386	1.94948	0.734696
Closed-Loop	Baseline	25.0219	12.7768	0.896517	0.075386	3.92296	12.9396	1.06265	0.334581	1.9022	0.735829
Closed-Loop	Baseline	25.0219	12.7768	0.896517	0.075386	3.92296	12.9396	0.876044	0.313656	2.11711	0.613487
Closed-Loop	Baseline	25.0219	12.7768	0.896517	0.075386	3.92296	12.9396	0.849713	0.250089	1.95383	0.766694
Closed-Loop	Baseline	25.0219	12.7768	0.896517	0.075386	3.92296	12.9396	0.925406	0.299861	1.90388	0.824871
Closed-Loop	Baseline	25.0219	12.7768	0.896517	0.075386	3.92296	12.9396	0.933846	0.273345	1.46618	0.7023
Closed-Loop	Baseline	25.0219	12.7768	0.896517	0.075386	3.92296	12.9396	1.07534	0.282797	1.71801	0.667944
Closed-Loop	Baseline	25.0219	12.7768	0.896517	0.075386	3.92296	12.9396	0.938546	0.281273	2.143	0.841217
Closed-Loop	Baseline	25.0219	12.7768	0.896517	0.075386	3.92296	12.9396	0.914365	0.251004	2.51477	0.634052
Closed-Loop	Baseline	25.0219	12.7768	0.896517	0.075386	3.92296	12.9396	0.938837	0.202133	1.97074	0.701005
Closed-Loop	Baseline	25.0219	12.7768	0.896517	0.075386	3.92296	12.9396	1.11186	0.266593	2.09834	0.708981
Closed-Loop	Baseline	25.0219	12.7768	0.896517	0.075386	3.92296	12.9396	1.0013	0.309669	2.28574	0.767257
Closed-Loop	Baseline	25.0219	12.7768	0.896517	0.075386	3.92296	12.9396	0.982075	0.232591	1.75673	0.717987
Closed-Loop	Baseline	25.0219	12.7768	0.896517	0.075386	3.92296	12.9396	0.988999	0.300784	2.11004	0.675068
Closed-Loop	Baseline	25.0219	12.7768	0.896517	0.075386	3.92296	12.9396	1.12921	0.395013	1.77785	0.652441
Closed-Loop	Baseline	25.0219	12.7768	0.896517	0.075386	3.92296	12.9396	0.925083	0.351153	2.25945	0.682909
Closed-Loop	Baseline	25.0219	12.7768	0.896517	0.075386	3.92296	12.9396	1.13155	0.382177	2.04542	0.649654
Closed-Loop	Baseline	25.0219	12.7768	0.896517	0.075386	3.92296	12.9396	1.02105	0.319556	2.08954	0.702391
Closed-Loop	Baseline	25.0219	12.7768	0.896517	0.075386	3.92296	12.9396	0.983958	0.358375	1.76522	0.67179
Closed-Loop	Baseline	25.0219	12.7768	0.896517	0.075386	3.92296	12.9396	1.25009	0.263802	2.21211	0.625298
Closed-Loop	Baseline	25.0219	12.7768	0.896517	0.075386	3.92296	12.9396	0.894436	0.267783	2.62541	0.762757
Closed-Loop	Baseline	25.0219	12.7768	0.896517	0.075386	3.92296	12.9396	0.964631	0.163043	1.69763	0.675116
Closed-Loop	Baseline	25.0219	12.7768	0.896517	0.075386	3.92296	12.9396	0.876757	0.359307	1.89807	0.636593
Closed-Loop	Baseline	25.0219	12.7768	0.896517	0.075386	3.92296	12.9396	1.09525	0.377016	2.06948	0.691587
Closed-Loop	Baseline	25.0219	12.7768	0.896517	0.075386	3.92296	12.9396	1.16892	0.272341	2.23592	0.703419
Closed-Loop	Baseline	25.0219	12.7768	0.896517	0.075386	3.92296	12.9396	1.16699	0.287302	1.83214	0.612677
Closed-Loop	Baseline	25.0219	12.7768	0.896517	0.075386	3.92296	12.9396	1.12239	0.262307	1.15009	0.716582
Closed-Loop	Baseline	25.0219	12.7768	0.896517	0.075386	3.92296	12.9396	0.980238	0.319133	2.40776	0.647642
Closed-Loop	Baseline	25.0219	12.7768	0.896517	0.075386	3.92296	12.9396	0.963476	0.356247	2.22815	0.785551
Closed-Loop	Baseline	25.0219	12.7768	0.896517	0.075386	3.92296	12.9396	0.832883	0.212861	1.47712	0.726198
Closed-Loop	Baseline	25.0219	12.7768	0.896517	0.075386	3.92296	12.9396	1.20359	0.320472	1.81773	0.680005
Closed-Loop	Baseline	25.0219	12.7768	0.896517	0.075386	3.92296	12.9396	1.0469	0.286166	2.47045	0.662742
Closed-Loop	Baseline	25.0219	12.7768	0.896517	0.075386	3.92296	12.9396	0.950804	0.30567	2.43434	0.694752
Closed-Loop	Baseline	25.0219	12.7768	0.896517	0.075386	3.92296	12.9396	1.13281	0.32295	2.28159	0.73064
Closed-Loop	Baseline	25.0219	12.7768	0.896517	0.075386	3.92296	12.9396	0.902724	0.29059	1.94717	0.698725
Closed-Loop	Baseline	25.0219	12.7768	0.896517	0.075386	3.92296	12.9396	1.04066	0.294821	2.0249	0.689142
Closed-Loop	Baseline	25.0219	12.7768	0.896517	0.075386	3.92296	12.9396	0.982737	0.289306	1.96072	0.702919
Closed-Loop	Baseline	25.0219	12.7768	0.896517	0.075386	3.92296	12.9396	1.06387	0.348516	2.33847	0.669807
Closed-Loop	Baseline	21.1762	17.007	0.601623	0.114226	2.99542	14.5115	0.951638	0.296821	2.12563	0.656208
Closed-Loop	Baseline	21.1762	17.007	0.601623	0.114226	2.99542	14.5115	1.08418	0.227454	2.06618	0.65971
Closed-Loop	Baseline	21.1762	17.007	0.601623	0.114226	2.99542	14.5115	0.894878	0.303779	1.61871	0.750514
Closed-Loop	Baseline	21.1762	17.007	0.601623	0.114226	2.99542	14.5115	0.746823	0.352443	1.88643	0.697782
Closed-Loop	Baseline	21.1762	17.007	0.601623	0.114226	2.99542	14.5115	0.977289	0.298539	2.2696	0.768923
Closed-Loop	Baseline	21.1762	17.007	0.601623	0.114226	2.99542	14.5115	0.985824	0.338756	2.01131	0.666424
Closed-Loop	Baseline	21.1762	17.007	0.601623	0.114226	2.99542	14.5115	1.01356	0.247724	2.19786	0.697261
Closed-Loop	Baseline	21.1762	17.007	0.601623	0.114226	2.99542	14.5115	1.07285	0.298687	2.52995	0.653879
Closed-Loop	Baseline	21.1762	17.007	0.601623	0.114226	2.99542	14.5115	1.06376	0.268774	2.31158	0.700368
Closed-Loop	Baseline	21.1762	17.007	0.601623	0.114226	2.99542	14.5115	1.02588	0.337349	2.02795	0.626073
Closed-Loop	Baseline	21.1762	17.007	0.601623	0.114226	2.99542	14.5115	1.11955	0.301575	1.8467	0.675618
Closed-Loop	Baseline	21.1762	17.007	0.601623	0.114226	2.99542	14.5115	0.848103	0.334504	1.23394	0.628187
Closed-Loop	Baseline	21.1762	17.007	0.601623	0.114226	2.99542	14.5115	1.05046	0.354386	1.94948	0.734696
Closed-Loop	Baseline	21.1762	17.007	0.601623	0.114226	2.99542	14.5115	1.06265	0.334581	1.9022	0.735829
Closed-Loop	Baseline	21.1762	17.007	0.601623	0.114226	2.99542	14.5115	0.876044	0.313656	2.11711	0.613487
Closed-Loop	Baseline	21.1762	17.007	0.601623	0.114226	2.99542	14.5115	0.849713	0.250089	1.95383	0.766694
Closed-Loop	Baseline	21.1762	17.007	0.601623	0.114226	2.99542	14.5115	0.925406	0.299861	1.90388	0.824871
Closed-Loop	Baseline	21.1762	17.007	0.601623	0.114226	2.99542	14.5115	0.933846	0.273345	1.46618	0.7023
Closed-Loop	Baseline	21.1762	17.007	0.601623	0.114226	2.99542	14.5115	1.07534	0.282797	1.71801	0.667944
Closed-Loop	Baseline	21.1762	17.007	0.601623	0.114226	2.99542	14.5115	0.938546	0.281273	2.143	0.841217
Closed-Loop	Baseline	21.1762	17.007	0.601623	0.114226	2.99542	14.5115	0.914365	0.251004	2.51477	0.634052
Closed-Loop	Baseline	21.1762	17.007	0.601623	0.114226	2.99542	14.5115	0.938837	0.202133	1.97074	0.701005
Closed-Loop	Baseline	21.1762	17.007	0.601623	0.114226	2.99542	14.5115	1.11186	0.266593	2.09834	0.708981
Closed-Loop	Baseline	21.1762	17.007	0.601623	0.114226	2.99542	14.5115	1.0013	0.309669	2.28574	0.767257
Closed-Loop	Baseline	21.1762	17.007	0.601623	0.114226	2.99542	14.5115	0.982075	0.232591	1.75673	0.717987
Closed-Loop	Baseline	21.1762	17.007	0.601623	0.114226	2.99542	14.5115	0.988999	0.300784	2.11004	0.675068
Closed-Loop	Baseline	21.1762	17.007	0.601623	0.114226	2.99542	14.5115	1.12921	0.395013	1.77785	0.652441
Closed-Loop	Baseline	21.1762	17.007	0.601623	0.114226	2.99542	14.5115	0.925083	0.351153	2.25945	0.682909
Closed-Loop	Baseline	21.1762	17.007	0.601623	0.114226	2.99542	14.5115	1.13155	0.382177	2.04542	0.649654
Closed-Loop	Baseline	21.1762	17.007	0.601623	0.114226	2.99542	14.5115	1.02105	0.319556	2.08954	0.702391
Closed-Loop	Baseline	21.1762	17.007	0.601623	0.114226	2.99542	14.5115	0.983958	0.358375	1.76522	0.67179
Closed-Loop	Baseline	21.1762	17.007	0.601623	0.114226	2.99542	14.5115	1.25009	0.263802	2.21211	0.625298
Closed-Loop	Baseline	21.1762	17.007	0.601623	0.114226	2.99542	14.5115	0.894436	0.267783	2.62541	0.762757
Closed-Loop	Baseline	21.1762	17.007	0.601623	0.114226	2.99542	14.5115	0.964631	0.163043	1.69763	0.675116
Closed-Loop	Baseline	21.1762	17.007	0.601623	0.114226	2.99542	14.5115	0.876757	0.359307	1.89807	0.636593
Closed-Loop	Baseline	21.1762	17.007	0.601623	0.114226	2.99542	14.5115	1.09525	0.377016	2.06948	0.691587
Closed-Loop	Baseline	21.1762	17.007	0.601623	0.114226	2.99542	14.5115	1.16892	0.272341	2.23592	0.703419
Closed-Loop	Baseline	21.1762	17.007	0.601623	0.114226	2.99542	14.5115	1.16699	0.287302	1.83214	0.612677
Closed-Loop	Baseline	21.1762	17.007	0.601623	0.114226	2.99542	14.5115	1.12239	0.262307	1.15009	0.716582
Closed-Loop	Baseline	21.1762	17.007	0.601623	0.114226	2.99542	14.5115	0.980238	0.319133	2.40776	0.647642
Closed-Loop	Baseline	21.1762	17.007	0.601623	0.114226	2.99542	14.5115	0.963476	0.356247	2.22815	0.785551
Closed-Loop	Baseline	21.1762	17.007	0.601623	0.114226	2.99542	14.5115	0.832883	0.212861	1.47712	0.726198
Closed-Loop	Baseline	21.1762	17.007	0.601623	0.114226	2.99542	14.5115	1.20359	0.320472	1.81773	0.680005
Closed-Loop	Baseline	21.1762	17.007	0.601623	0.114226	2.99542	14.5115	1.0469	0.286166	2.47045	0.662742
Closed-Loop	Baseline	21.1762	17.007	0.601623	0.114226	2.99542	14.5115	0.950804	0.30567	2.43434	0.694752
Closed-Loop	Baseline	21.1762	17.007	0.601623	0.114226	2.99542	14.5115	1.13281	0.32295	2.28159	0.73064
Closed-Loop	Baseline	21.1762	17.007	0.601623	0.114226	2.99542	14.5115	0.902724	0.29059	1.94717	0.698725
Closed-Loop	Baseline	21.1762	17.007	0.601623	0.114226	2.99542	14.5115	1.04066	0.294821	2.0249	0.689142
Closed-Loop	Baseline	21.1762	17.007	0.601623	0.114226	2.99542	14.5115	0.982737	0.289306	1.96072	0.702919
Closed-Loop	Baseline	21.1762	17.007	0.601623	0.114226	2.99542	14.5115	1.06387	0.348516	2.33847	0.669807
Closed-Loop	Baseline	21.6461	18.2707	0.830734	0.077304	7.12193	9.99777	0.951638	0.296821	2.12563	0.656208
Closed-Loop	Baseline	21.6461	18.2707	0.830734	0.077304	7.12193	9.99777	1.08418	0.227454	2.06618	0.65971
Closed-Loop	Baseline	21.6461	18.2707	0.830734	0.077304	7.12193	9.99777	0.894878	0.303779	1.61871	0.750514
Closed-Loop	Baseline	21.6461	18.2707	0.830734	0.077304	7.12193	9.99777	0.746823	0.352443	1.88643	0.697782
Closed-Loop	Baseline	21.6461	18.2707	0.830734	0.077304	7.12193	9.99777	0.977289	0.298539	2.2696	0.768923
Closed-Loop	Baseline	21.6461	18.2707	0.830734	0.077304	7.12193	9.99777	0.985824	0.338756	2.01131	0.666424
Closed-Loop	Baseline	21.6461	18.2707	0.830734	0.077304	7.12193	9.99777	1.01356	0.247724	2.19786	0.697261
Closed-Loop	Baseline	21.6461	18.2707	0.830734	0.077304	7.12193	9.99777	1.07285	0.298687	2.52995	0.653879
Closed-Loop	Baseline	21.6461	18.2707	0.830734	0.077304	7.12193	9.99777	1.06376	0.268774	2.31158	0.700368
Closed-Loop	Baseline	21.6461	18.2707	0.830734	0.077304	7.12193	9.99777	1.02588	0.337349	2.02795	0.626073
Closed-Loop	Baseline	21.6461	18.2707	0.830734	0.077304	7.12193	9.99777	1.11955	0.301575	1.8467	0.675618
Closed-Loop	Baseline	21.6461	18.2707	0.830734	0.077304	7.12193	9.99777	0.848103	0.334504	1.23394	0.628187
Closed-Loop	Baseline	21.6461	18.2707	0.830734	0.077304	7.12193	9.99777	1.05046	0.354386	1.94948	0.734696
Closed-Loop	Baseline	21.6461	18.2707	0.830734	0.077304	7.12193	9.99777	1.06265	0.334581	1.9022	0.735829
Closed-Loop	Baseline	21.6461	18.2707	0.830734	0.077304	7.12193	9.99777	0.876044	0.313656	2.11711	0.613487
Closed-Loop	Baseline	21.6461	18.2707	0.830734	0.077304	7.12193	9.99777	0.849713	0.250089	1.95383	0.766694
Closed-Loop	Baseline	21.6461	18.2707	0.830734	0.077304	7.12193	9.99777	0.925406	0.299861	1.90388	0.824871
Closed-Loop	Baseline	21.6461	18.2707	0.830734	0.077304	7.12193	9.99777	0.933846	0.273345	1.46618	0.7023
Closed-Loop	Baseline	21.6461	18.2707	0.830734	0.077304	7.12193	9.99777	1.07534	0.282797	1.71801	0.667944
Closed-Loop	Baseline	21.6461	18.2707	0.830734	0.077304	7.12193	9.99777	0.938546	0.281273	2.143	0.841217
Closed-Loop	Baseline	21.6461	18.2707	0.830734	0.077304	7.12193	9.99777	0.914365	0.251004	2.51477	0.634052
Closed-Loop	Baseline	21.6461	18.2707	0.830734	0.077304	7.12193	9.99777	0.938837	0.202133	1.97074	0.701005
Closed-Loop	Baseline	21.6461	18.2707	0.830734	0.077304	7.12193	9.99777	1.11186	0.266593	2.09834	0.708981
Closed-Loop	Baseline	21.6461	18.2707	0.830734	0.077304	7.12193	9.99777	1.0013	0.309669	2.28574	0.767257
Closed-Loop	Baseline	21.6461	18.2707	0.830734	0.077304	7.12193	9.99777	0.982075	0.232591	1.75673	0.717987
Closed-Loop	Baseline	21.6461	18.2707	0.830734	0.077304	7.12193	9.99777	0.988999	0.300784	2.11004	0.675068
Closed-Loop	Baseline	21.6461	18.2707	0.830734	0.077304	7.12193	9.99777	1.12921	0.395013	1.77785	0.652441
Closed-Loop	Baseline	21.6461	18.2707	0.830734	0.077304	7.12193	9.99777	0.925083	0.351153	2.25945	0.682909
Closed-Loop	Baseline	21.6461	18.2707	0.830734	0.077304	7.12193	9.99777	1.13155	0.382177	2.04542	0.649654
Closed-Loop	Baseline	21.6461	18.2707	0.830734	0.077304	7.12193	9.99777	1.02105	0.319556	2.08954	0.702391
Closed-Loop	Baseline	21.6461	18.2707	0.830734	0.077304	7.12193	9.99777	0.983958	0.358375	1.76522	0.67179
Closed-Loop	Baseline	21.6461	18.2707	0.830734	0.077304	7.12193	9.99777	1.25009	0.263802	2.21211	0.625298
Closed-Loop	Baseline	21.6461	18.2707	0.830734	0.077304	7.12193	9.99777	0.894436	0.267783	2.62541	0.762757
Closed-Loop	Baseline	21.6461	18.2707	0.830734	0.077304	7.12193	9.99777	0.964631	0.163043	1.69763	0.675116
Closed-Loop	Baseline	21.6461	18.2707	0.830734	0.077304	7.12193	9.99777	0.876757	0.359307	1.89807	0.636593
Closed-Loop	Baseline	21.6461	18.2707	0.830734	0.077304	7.12193	9.99777	1.09525	0.377016	2.06948	0.691587
Closed-Loop	Baseline	21.6461	18.2707	0.830734	0.077304	7.12193	9.99777	1.16892	0.272341	2.23592	0.703419
Closed-Loop	Baseline	21.6461	18.2707	0.830734	0.077304	7.12193	9.99777	1.16699	0.287302	1.83214	0.612677
Closed-Loop	Baseline	21.6461	18.2707	0.830734	0.077304	7.12193	9.99777	1.12239	0.262307	1.15009	0.716582
Closed-Loop	Baseline	21.6461	18.2707	0.830734	0.077304	7.12193	9.99777	0.980238	0.319133	2.40776	0.647642
Closed-Loop	Baseline	21.6461	18.2707	0.830734	0.077304	7.12193	9.99777	0.963476	0.356247	2.22815	0.785551
Closed-Loop	Baseline	21.6461	18.2707	0.830734	0.077304	7.12193	9.99777	0.832883	0.212861	1.47712	0.726198
Closed-Loop	Baseline	21.6461	18.2707	0.830734	0.077304	7.12193	9.99777	1.20359	0.320472	1.81773	0.680005
Closed-Loop	Baseline	21.6461	18.2707	0.830734	0.077304	7.12193	9.99777	1.0469	0.286166	2.47045	0.662742
Closed-Loop	Baseline	21.6461	18.2707	0.830734	0.077304	7.12193	9.99777	0.950804	0.30567	2.43434	0.694752
Closed-Loop	Baseline	21.6461	18.2707	0.830734	0.077304	7.12193	9.99777	1.13281	0.32295	2.28159	0.73064
Closed-Loop	Baseline	21.6461	18.2707	0.830734	0.077304	7.12193	9.99777	0.902724	0.29059	1.94717	0.698725
Closed-Loop	Baseline	21.6461	18.2707	0.830734	0.077304	7.12193	9.99777	1.04066	0.294821	2.0249	0.689142
Closed-Loop	Baseline	21.6461	18.2707	0.830734	0.077304	7.12193	9.99777	0.982737	0.289306	1.96072	0.702919
Closed-Loop	Baseline	21.6461	18.2707	0.830734	0.077304	7.12193	9.99777	1.06387	0.348516	2.33847	0.669807
Closed-Loop	Baseline	18.6262	17.7523	0.859656	0.0813619	6.76706	14.8106	0.951638	0.296821	2.12563	0.656208
Closed-Loop	Baseline	18.6262	17.7523	0.859656	0.0813619	6.76706	14.8106	1.08418	0.227454	2.06618	0.65971
Closed-Loop	Baseline	18.6262	17.7523	0.859656	0.0813619	6.76706	14.8106	0.894878	0.303779	1.61871	0.750514
Closed-Loop	Baseline	18.6262	17.7523	0.859656	0.0813619	6.76706	14.8106	0.746823	0.352443	1.88643	0.697782
Closed-Loop	Baseline	18.6262	17.7523	0.859656	0.0813619	6.76706	14.8106	0.977289	0.298539	2.2696	0.768923
Closed-Loop	Baseline	18.6262	17.7523	0.859656	0.0813619	6.76706	14.8106	0.985824	0.338756	2.01131	0.666424
Closed-Loop	Baseline	18.6262	17.7523	0.859656	0.0813619	6.76706	14.8106	1.01356	0.247724	2.19786	0.697261
Closed-Loop	Baseline	18.6262	17.7523	0.859656	0.0813619	6.76706	14.8106	1.07285	0.298687	2.52995	0.653879
Closed-Loop	Baseline	18.6262	17.7523	0.859656	0.0813619	6.76706	14.8106	1.06376	0.268774	2.31158	0.700368
Closed-Loop	Baseline	18.6262	17.7523	0.859656	0.0813619	6.76706	14.8106	1.02588	0.337349	2.02795	0.626073
Closed-Loop	Baseline	18.6262	17.7523	0.859656	0.0813619	6.76706	14.8106	1.11955	0.301575	1.8467	0.675618
Closed-Loop	Baseline	18.6262	17.7523	0.859656	0.0813619	6.76706	14.8106	0.848103	0.334504	1.23394	0.628187
Closed-Loop	Baseline	18.6262	17.7523	0.859656	0.0813619	6.76706	14.8106	1.05046	0.354386	1.94948	0.734696
Closed-Loop	Baseline	18.6262	17.7523	0.859656	0.0813619	6.76706	14.8106	1.06265	0.334581	1.9022	0.735829
Closed-Loop	Baseline	18.6262	17.7523	0.859656	0.0813619	6.76706	14.8106	0.876044	0.313656	2.11711	0.613487
Closed-Loop	Baseline	18.6262	17.7523	0.859656	0.0813619	6.76706	14.8106	0.849713	0.250089	1.95383	0.766694
Closed-Loop	Baseline	18.6262	17.7523	0.859656	0.0813619	6.76706	14.8106	0.925406	0.299861	1.90388	0.824871
Closed-Loop	Baseline	18.6262	17.7523	0.859656	0.0813619	6.76706	14.8106	0.933846	0.273345	1.46618	0.7023
Closed-Loop	Baseline	18.6262	17.7523	0.859656	0.0813619	6.76706	14.8106	1.07534	0.282797	1.71801	0.667944
Closed-Loop	Baseline	18.6262	17.7523	0.859656	0.0813619	6.76706	14.8106	0.938546	0.281273	2.143	0.841217
Closed-Loop	Baseline	18.6262	17.7523	0.859656	0.0813619	6.76706	14.8106	0.914365	0.251004	2.51477	0.634052
Closed-Loop	Baseline	18.6262	17.7523	0.859656	0.0813619	6.76706	14.8106	0.938837	0.202133	1.97074	0.701005
Closed-Loop	Baseline	18.6262	17.7523	0.859656	0.0813619	6.76706	14.8106	1.11186	0.266593	2.09834	0.708981
Closed-Loop	Baseline	18.6262	17.7523	0.859656	0.0813619	6.76706	14.8106	1.0013	0.309669	2.28574	0.767257
Closed-Loop	Baseline	18.6262	17.7523	0.859656	0.0813619	6.76706	14.8106	0.982075	0.232591	1.75673	0.717987
Closed-Loop	Baseline	18.6262	17.7523	0.859656	0.0813619	6.76706	14.8106	0.988999	0.300784	2.11004	0.675068
Closed-Loop	Baseline	18.6262	17.7523	0.859656	0.0813619	6.76706	14.8106	1.12921	0.395013	1.77785	0.652441
Closed-Loop	Baseline	18.6262	17.7523	0.859656	0.0813619	6.76706	14.8106	0.925083	0.351153	2.25945	0.682909
Closed-Loop	Baseline	18.6262	17.7523	0.859656	0.0813619	6.76706	14.8106	1.13155	0.382177	2.04542	0.649654
Closed-Loop	Baseline	18.6262	17.7523	0.859656	0.0813619	6.76706	14.8106	1.02105	0.319556	2.08954	0.702391
Closed-Loop	Baseline	18.6262	17.7523	0.859656	0.0813619	6.76706	14.8106	0.983958	0.358375	1.76522	0.67179
Closed-Loop	Baseline	18.6262	17.7523	0.859656	0.0813619	6.76706	14.8106	1.25009	0.263802	2.21211	0.625298
Closed-Loop	Baseline	18.6262	17.7523	0.859656	0.0813619	6.76706	14.8106	0.894436	0.267783	2.62541	0.762757
Closed-Loop	Baseline	18.6262	17.7523	0.859656	0.0813619	6.76706	14.8106	0.964631	0.163043	1.69763	0.675116
Closed-Loop	Baseline	18.6262	17.7523	0.859656	0.0813619	6.76706	14.8106	0.876757	0.359307	1.89807	0.636593
Closed-Loop	Baseline	18.6262	17.7523	0.859656	0.0813619	6.76706	14.8106	1.09525	0.377016	2.06948	0.691587
Closed-Loop	Baseline	18.6262	17.7523	0.859656	0.0813619	6.76706	14.8106	1.16892	0.272341	2.23592	0.703419
Closed-Loop	Baseline	18.6262	17.7523	0.859656	0.0813619	6.76706	14.8106	1.16699	0.287302	1.83214	0.612677
Closed-Loop	Baseline	18.6262	17.7523	0.859656	0.0813619	6.76706	14.8106	1.12239	0.262307	1.15009	0.716582
Closed-Loop	Baseline	18.6262	17.7523	0.859656	0.0813619	6.76706	14.8106	0.980238	0.319133	2.40776	0.647642
Closed-Loop	Baseline	18.6262	17.7523	0.859656	0.0813619	6.76706	14.8106	0.963476	0.356247	2.22815	0.785551
Closed-Loop	Baseline	18.6262	17.7523	0.859656	0.0813619	6.76706	14.8106	0.832883	0.212861	1.47712	0.726198
Closed-Loop	Baseline	18.6262	17.7523	0.859656	0.0813619	6.76706	14.8106	1.20359	0.320472	1.81773	0.680005
Closed-Loop	Baseline	18.6262	17.7523	0.859656	0.0813619	6.76706	14.8106	1.0469	0.286166	2.47045	0.662742
Closed-Loop	Baseline	18.6262	17.7523	0.859656	0.0813619	6.76706	14.8106	0.950804	0.30567	2.43434	0.694752
Closed-Loop	Baseline	18.6262	17.7523	0.859656	0.0813619	6.76706	14.8106	1.13281	0.32295	2.28159	0.73064
Closed-Loop	Baseline	18.6262	17.7523	0.859656	0.0813619	6.76706	14.8106	0.902724	0.29059	1.94717	0.698725
Closed-Loop	Baseline	18.6262	17.7523	0.859656	0.0813619	6.76706	14.8106	1.04066	0.294821	2.0249	0.689142
Closed-Loop	Baseline	18.6262	17.7523	0.859656	0.0813619	6.76706	14.8106	0.982737	0.289306	1.96072	0.702919
Closed-Loop	Baseline	18.6262	17.7523	0.859656	0.0813619	6.76706	14.8106	1.06387	0.348516	2.33847	0.669807
Closed-Loop	Baseline	23.3221	18.6094	0.845988	0.0849615	5.61388	18.8142	0.951638	0.296821	2.12563	0.656208
Closed-Loop	Baseline	23.3221	18.6094	0.845988	0.0849615	5.61388	18.8142	1.08418	0.227454	2.06618	0.65971
Closed-Loop	Baseline	23.3221	18.6094	0.845988	0.0849615	5.61388	18.8142	0.894878	0.303779	1.61871	0.750514
Closed-Loop	Baseline	23.3221	18.6094	0.845988	0.0849615	5.61388	18.8142	0.746823	0.352443	1.88643	0.697782
Closed-Loop	Baseline	23.3221	18.6094	0.845988	0.0849615	5.61388	18.8142	0.977289	0.298539	2.2696	0.768923
Closed-Loop	Baseline	23.3221	18.6094	0.845988	0.0849615	5.61388	18.8142	0.985824	0.338756	2.01131	0.666424
Closed-Loop	Baseline	23.3221	18.6094	0.845988	0.0849615	5.61388	18.8142	1.01356	0.247724	2.19786	0.697261
Closed-Loop	Baseline	23.3221	18.6094	0.845988	0.0849615	5.61388	18.8142	1.07285	0.298687	2.52995	0.653879
Closed-Loop	Baseline	23.3221	18.6094	0.845988	0.0849615	5.61388	18.8142	1.06376	0.268774	2.31158	0.700368
Closed-Loop	Baseline	23.3221	18.6094	0.845988	0.0849615	5.61388	18.8142	1.02588	0.337349	2.02795	0.626073
Closed-Loop	Baseline	23.3221	18.6094	0.845988	0.0849615	5.61388	18.8142	1.11955	0.301575	1.8467	0.675618
Closed-Loop	Baseline	23.3221	18.6094	0.845988	0.0849615	5.61388	18.8142	0.848103	0.334504	1.23394	0.628187
Closed-Loop	Baseline	23.3221	18.6094	0.845988	0.0849615	5.61388	18.8142	1.05046	0.354386	1.94948	0.734696
Closed-Loop	Baseline	23.3221	18.6094	0.845988	0.0849615	5.61388	18.8142	1.06265	0.334581	1.9022	0.735829
Closed-Loop	Baseline	23.3221	18.6094	0.845988	0.0849615	5.61388	18.8142	0.876044	0.313656	2.11711	0.613487
Closed-Loop	Baseline	23.3221	18.6094	0.845988	0.0849615	5.61388	18.8142	0.849713	0.250089	1.95383	0.766694
Closed-Loop	Baseline	23.3221	18.6094	0.845988	0.0849615	5.61388	18.8142	0.925406	0.299861	1.90388	0.824871
Closed-Loop	Baseline	23.3221	18.6094	0.845988	0.0849615	5.61388	18.8142	0.933846	0.273345	1.46618	0.7023
Closed-Loop	Baseline	23.3221	18.6094	0.845988	0.0849615	5.61388	18.8142	1.07534	0.282797	1.71801	0.667944
Closed-Loop	Baseline	23.3221	18.6094	0.845988	0.0849615	5.61388	18.8142	0.938546	0.281273	2.143	0.841217
Closed-Loop	Baseline	23.3221	18.6094	0.845988	0.0849615	5.61388	18.8142	0.914365	0.251004	2.51477	0.634052
Closed-Loop	Baseline	23.3221	18.6094	0.845988	0.0849615	5.61388	18.8142	0.938837	0.202133	1.97074	0.701005
Closed-Loop	Baseline	23.3221	18.6094	0.845988	0.0849615	5.61388	18.8142	1.11186	0.266593	2.09834	0.708981
Closed-Loop	Baseline	23.3221	18.6094	0.845988	0.0849615	5.61388	18.8142	1.0013	0.309669	2.28574	0.767257
Closed-Loop	Baseline	23.3221	18.6094	0.845988	0.0849615	5.61388	18.8142	0.982075	0.232591	1.75673	0.717987
Closed-Loop	Baseline	23.3221	18.6094	0.845988	0.0849615	5.61388	18.8142	0.988999	0.300784	2.11004	0.675068
Closed-Loop	Baseline	23.3221	18.6094	0.845988	0.0849615	5.61388	18.8142	1.12921	0.395013	1.77785	0.652441
Closed-Loop	Baseline	23.3221	18.6094	0.845988	0.0849615	5.61388	18.8142	0.925083	0.351153	2.25945	0.682909
Closed-Loop	Baseline	23.3221	18.6094	0.845988	0.0849615	5.61388	18.8142	1.13155	0.382177	2.04542	0.649654
Closed-Loop	Baseline	23.3221	18.6094	0.845988	0.0849615	5.61388	18.8142	1.02105	0.319556	2.08954	0.702391
Closed-Loop	Baseline	23.3221	18.6094	0.845988	0.0849615	5.61388	18.8142	0.983958	0.358375	1.76522	0.67179
Closed-Loop	Baseline	23.3221	18.6094	0.845988	0.0849615	5.61388	18.8142	1.25009	0.263802	2.21211	0.625298
Closed-Loop	Baseline	23.3221	18.6094	0.845988	0.0849615	5.61388	18.8142	0.894436	0.267783	2.62541	0.762757
Closed-Loop	Baseline	23.3221	18.6094	0.845988	0.0849615	5.61388	18.8142	0.964631	0.163043	1.69763	0.675116
Closed-Loop	Baseline	23.3221	18.6094	0.845988	0.0849615	5.61388	18.8142	0.876757	0.359307	1.89807	0.636593
Closed-Loop	Baseline	23.3221	18.6094	0.845988	0.0849615	5.61388	18.8142	1.09525	0.377016	2.06948	0.691587
Closed-Loop	Baseline	23.3221	18.6094	0.845988	0.0849615	5.61388	18.8142	1.16892	0.272341	2.23592	0.703419
Closed-Loop	Baseline	23.3221	18.6094	0.845988	0.0849615	5.61388	18.8142	1.16699	0.287302	1.83214	0.612677
Closed-Loop	Baseline	23.3221	18.6094	0.845988	0.0849615	5.61388	18.8142	1.12239	0.262307	1.15009	0.716582
Closed-Loop	Baseline	23.3221	18.6094	0.845988	0.0849615	5.61388	18.8142	0.980238	0.319133	2.40776	0.647642
Closed-Loop	Baseline	23.3221	18.6094	0.845988	0.0849615	5.61388	18.8142	0.963476	0.356247	2.22815	0.785551
Closed-Loop	Baseline	23.3221	18.6094	0.845988	0.0849615	5.61388	18.8142	0.832883	0.212861	1.47712	0.726198
Closed-Loop	Baseline	23.3221	18.6094	0.845988	0.0849615	5.61388	18.8142	1.20359	0.320472	1.81773	0.680005
Closed-Loop	Baseline	23.3221	18.6094	0.845988	0.0849615	5.61388	18.8142	1.0469	0.286166	2.47045	0.662742
Closed-Loop	Baseline	23.3221	18.6094	0.845988	0.0849615	5.61388	18.8142	0.950804	0.30567	2.43434	0.694752
Closed-Loop	Baseline	23.3221	18.6094	0.845988	0.0849615	5.61388	18.8142	1.13281	0.32295	2.28159	0.73064
Closed-Loop	Baseline	23.3221	18.6094	0.845988	0.0849615	5.61388	18.8142	0.902724	0.29059	1.94717	0.698725
Closed-Loop	Baseline	23.3221	18.6094	0.845988	0.0849615	5.61388	18.8142	1.04066	0.294821	2.0249	0.689142
Closed-Loop	Baseline	23.3221	18.6094	0.845988	0.0849615	5.61388	18.8142	0.982737	0.289306	1.96072	0.702919
Closed-Loop	Baseline	23.3221	18.6094	0.845988	0.0849615	5.61388	18.8142	1.06387	0.348516	2.33847	0.669807
Closed-Loop	Baseline	16.7198	16.7208	0.896551	0.0539732	6.71078	11.3139	0.951638	0.296821	2.12563	0.656208
Closed-Loop	Baseline	16.7198	16.7208	0.896551	0.0539732	6.71078	11.3139	1.08418	0.227454	2.06618	0.65971
Closed-Loop	Baseline	16.7198	16.7208	0.896551	0.0539732	6.71078	11.3139	0.894878	0.303779	1.61871	0.750514
Closed-Loop	Baseline	16.7198	16.7208	0.896551	0.0539732	6.71078	11.3139	0.746823	0.352443	1.88643	0.697782
Closed-Loop	Baseline	16.7198	16.7208	0.896551	0.0539732	6.71078	11.3139	0.977289	0.298539	2.2696	0.768923
Closed-Loop	Baseline	16.7198	16.7208	0.896551	0.0539732	6.71078	11.3139	0.985824	0.338756	2.01131	0.666424
Closed-Loop	Baseline	16.7198	16.7208	0.896551	0.0539732	6.71078	11.3139	1.01356	0.247724	2.19786	0.697261
Closed-Loop	Baseline	16.7198	16.7208	0.896551	0.0539732	6.71078	11.3139	1.07285	0.298687	2.52995	0.653879
Closed-Loop	Baseline	16.7198	16.7208	0.896551	0.0539732	6.71078	11.3139	1.06376	0.268774	2.31158	0.700368
Closed-Loop	Baseline	16.7198	16.7208	0.896551	0.0539732	6.71078	11.3139	1.02588	0.337349	2.02795	0.626073
Closed-Loop	Baseline	16.7198	16.7208	0.896551	0.0539732	6.71078	11.3139	1.11955	0.301575	1.8467	0.675618
Closed-Loop	Baseline	16.7198	16.7208	0.896551	0.0539732	6.71078	11.3139	0.848103	0.334504	1.23394	0.628187
Closed-Loop	Baseline	16.7198	16.7208	0.896551	0.0539732	6.71078	11.3139	1.05046	0.354386	1.94948	0.734696
Closed-Loop	Baseline	16.7198	16.7208	0.896551	0.0539732	6.71078	11.3139	1.06265	0.334581	1.9022	0.735829
Closed-Loop	Baseline	16.7198	16.7208	0.896551	0.0539732	6.71078	11.3139	0.876044	0.313656	2.11711	0.613487
Closed-Loop	Baseline	16.7198	16.7208	0.896551	0.0539732	6.71078	11.3139	0.849713	0.250089	1.95383	0.766694
Closed-Loop	Baseline	16.7198	16.7208	0.896551	0.0539732	6.71078	11.3139	0.925406	0.299861	1.90388	0.824871
Closed-Loop	Baseline	16.7198	16.7208	0.896551	0.0539732	6.71078	11.3139	0.933846	0.273345	1.46618	0.7023
Closed-Loop	Baseline	16.7198	16.7208	0.896551	0.0539732	6.71078	11.3139	1.07534	0.282797	1.71801	0.667944
Closed-Loop	Baseline	16.7198	16.7208	0.896551	0.0539732	6.71078	11.3139	0.938546	0.281273	2.143	0.841217
Closed-Loop	Baseline	16.7198	16.7208	0.896551	0.0539732	6.71078	11.3139	0.914365	0.251004	2.51477	0.634052
Closed-Loop	Baseline	16.7198	16.7208	0.896551	0.0539732	6.71078	11.3139	0.938837	0.202133	1.97074	0.701005
Closed-Loop	Baseline	16.7198	16.7208	0.896551	0.0539732	6.71078	11.3139	1.11186	0.266593	2.09834	0.708981
Closed-Loop	Baseline	16.7198	16.7208	0.896551	0.0539732	6.71078	11.3139	1.0013	0.309669	2.28574	0.767257
Closed-Loop	Baseline	16.7198	16.7208	0.896551	0.0539732	6.71078	11.3139	0.982075	0.232591	1.75673	0.717987
Closed-Loop	Baseline	16.7198	16.7208	0.896551	0.0539732	6.71078	11.3139	0.988999	0.300784	2.11004	0.675068
Closed-Loop	Baseline	16.7198	16.7208	0.896551	0.0539732	6.71078	11.3139	1.12921	0.395013	1.77785	0.652441
Closed-Loop	Baseline	16.7198	16.7208	0.896551	0.0539732	6.71078	11.3139	0.925083	0.351153	2.25945	0.682909
Closed-Loop	Baseline	16.7198	16.7208	0.896551	0.0539732	6.71078	11.3139	1.13155	0.382177	2.04542	0.649654
Closed-Loop	Baseline	16.7198	16.7208	0.896551	0.0539732	6.71078	11.3139	1.02105	0.319556	2.08954	0.702391
Closed-Loop	Baseline	16.7198	16.7208	0.896551	0.0539732	6.71078	11.3139	0.983958	0.358375	1.76522	0.67179
Closed-Loop	Baseline	16.7198	16.7208	0.896551	0.0539732	6.71078	11.3139	1.25009	0.263802	2.21211	0.625298
Closed-Loop	Baseline	16.7198	16.7208	0.896551	0.0539732	6.71078	11.3139	0.894436	0.267783	2.62541	0.762757
Closed-Loop	Baseline	16.7198	16.7208	0.896551	0.0539732	6.71078	11.3139	0.964631	0.163043	1.69763	0.675116
Closed-Loop	Baseline	16.7198	16.7208	0.896551	0.0539732	6.71078	11.3139	0.876757	0.359307	1.89807	0.636593
Closed-Loop	Baseline	16.7198	16.7208	0.896551	0.0539732	6.71078	11.3139	1.09525	0.377016	2.06948	0.691587
Closed-Loop	Baseline	16.7198	16.7208	0.896551	0.0539732	6.71078	11.3139	1.16892	0.272341	2.23592	0.703419
Closed-Loop	Baseline	16.7198	16.7208	0.896551	0.0539732	6.71078	11.3139	1.16699	0.287302	1.83214	0.612677
Closed-Loop	Baseline	16.7198	16.7208	0.896551	0.0539732	6.71078	11.3139	1.12239	0.262307	1.15009	0.716582
Closed-Loop	Baseline	16.7198	16.7208	0.896551	0.0539732	6.71078	11.3139	0.980238	0.319133	2.40776	0.647642
Closed-Loop	Baseline	16.7198	16.7208	0.896551	0.0539732	6.71078	11.3139	0.963476	0.356247	2.22815	0.785551
Closed-Loop	Baseline	16.7198	16.7208	0.896551	0.0539732	6.71078	11.3139	0.832883	0.212861	1.47712	0.726198
Closed-Loop	Baseline	16.7198	16.7208	0.896551	0.0539732	6.71078	11.3139	1.20359	0.320472	1.81773	0.680005
Closed-Loop	Baseline	16.7198	16.7208	0.896551	0.0539732	6.71078	11.3139	1.0469	0.286166	2.47045	0.662742
Closed-Loop	Baseline	16.7198	16.7208	0.896551	0.0539732	6.71078	11.3139	0.950804	0.30567	2.43434	0.694752
Closed-Loop	Baseline	16.7198	16.7208	0.896551	0.0539732	6.71078	11.3139	1.13281	0.32295	2.28159	0.73064
Closed-Loop	Baseline	16.7198	16.7208	0.896551	0.0539732	6.71078	11.3139	0.902724	0.29059	1.94717	0.698725
Closed-Loop	Baseline	16.7198	16.7208	0.896551	0.0539732	6.71078	11.3139	1.04066	0.294821	2.0249	0.689142
Closed-Loop	Baseline	16.7198	16.7208	0.896551	0.0539732	6.71078	11.3139	0.982737	0.289306	1.96072	0.702919
[truncated: 23,001 more rows]
