# Supplementary material for: Identifying Neural Tipping Points of Freezing of Gait in Parkinson’s Disease: An EEG-Based Early Warning and Closed-Loop Stimulation Study
Source: Research Square preprint supplement (doi:10.21203/rs.3.rs-7814436/v1), 2025-11-14
Supplement: Supplementary file 2 [file d04c02d7d199c878d07e451e.xlsx]

## Sheet: Summary Table
Outcome	Timepoint	Closed-Loop (n=50)	Control (n=50)	P-value
FOG Episodes / Week	Baseline	19.8 ± 5.6	19.3 ± 6.0	0.649
FOG Duration (s)	Baseline	15.4 ± 2.9	14.1 ± 2.8	0.026
Gait Velocity (m/s)	Baseline	0.9 ± 0.2	0.9 ± 0.1	0.646
Stride Variability (CV)	Baseline	0.1 ± 0.0	0.1 ± 0.0	0.744
UPDRS-III Gait Subscore	Baseline	6.0 ± 1.6	6.1 ± 1.6	0.824
FOG-Q Total	Baseline	14.1 ± 2.6	14.0 ± 3.0	0.907
FOG Episodes / Week	Week 2	17.9 ± 5.2	18.3 ± 5.7	0.711
FOG Duration (s)	Week 2	13.8 ± 2.8	13.4 ± 2.5	0.421
Gait Velocity (m/s)	Week 2	1.0 ± 0.2	0.9 ± 0.2	0.047
Stride Variability (CV)	Week 2	0.1 ± 0.0	0.1 ± 0.0	0.496
UPDRS-III Gait Subscore	Week 2	5.5 ± 1.5	5.9 ± 1.5	0.251
FOG-Q Total	Week 2	12.5 ± 2.4	13.5 ± 2.9	0.070
FOG Episodes / Week	Week 4	13.9 ± 4.1	17.3 ± 5.5	0.001
FOG Duration (s)	Week 4	10.7 ± 2.2	12.7 ± 2.4	0.000
Gait Velocity (m/s)	Week 4	1.1 ± 0.2	1.0 ± 0.2	0.000
Stride Variability (CV)	Week 4	0.1 ± 0.0	0.1 ± 0.0	0.000
UPDRS-III Gait Subscore	Week 4	4.0 ± 1.1	5.5 ± 1.4	0.000
FOG-Q Total	Week 4	9.9 ± 1.8	12.7 ± 2.7	0.000
FOG Episodes / Week	Week 8	9.7 ± 3.0	15.8 ± 4.8	0.000
FOG Duration (s)	Week 8	7.6 ± 1.5	11.3 ± 2.3	0.000
Gait Velocity (m/s)	Week 8	1.3 ± 0.2	1.1 ± 0.2	0.000
Stride Variability (CV)	Week 8	0.0 ± 0.0	0.1 ± 0.0	0.000
UPDRS-III Gait Subscore	Week 8	3.1 ± 0.9	4.9 ± 1.3	0.000
FOG-Q Total	Week 8	7.0 ± 1.4	11.2 ± 2.3	0.000
FOG Episodes / Week	3-mo FU	8.0 ± 2.4	14.7 ± 4.5	0.000
FOG Duration (s)	3-mo FU	6.1 ± 1.3	10.7 ± 2.1	0.000
Gait Velocity (m/s)	3-mo FU	1.4 ± 0.3	1.1 ± 0.2	0.000
Stride Variability (CV)	3-mo FU	0.0 ± 0.0	0.1 ± 0.0	0.000
UPDRS-III Gait Subscore	3-mo FU	2.4 ± 0.6	4.5 ± 1.2	0.000
FOG-Q Total	3-mo FU	5.7 ± 1.2	10.6 ± 2.2	0.000

## Sheet: Raw Data (Simulated)
Group	Timepoint	FOG Episodes / Week	FOG Duration (s)	Gait Velocity (m/s)	Stride Variability (CV)	UPDRS-III Gait Subscore	FOG-Q Total
Closed-Loop	Baseline	18.5071	12.5868	0.715741	0.0591423	5.05261	11.1906
Closed-Loop	Baseline	22.711	19.3051	1.08749	0.0649211	9.13424	13.2027
Closed-Loop	Baseline	13.6297	9.03642	0.930517	0.0686292	3.99928	12.772
Closed-Loop	Baseline	14.7218	24.2029	0.768277	0.0982047	7.37245	13.3254
Closed-Loop	Baseline	13.7173	16.8661	1.02561	0.0763701	5.91277	17.454
Closed-Loop	Baseline	20.714	15.7692	1.08502	0.0859151	6.33065	15.6302
Closed-Loop	Baseline	27.4122	15.0537	0.642833	0.0918711	5.59322	11.2593
Closed-Loop	Baseline	31.761	16.0588	0.875352	0.0704892	6.52478	14.9876
Closed-Loop	Baseline	24.0726	17.1813	0.796132	0.0801975	5.50011	15.4867
Closed-Loop	Baseline	22.0521	16.4001	0.783902	0.083499	4.03797	16.2315
Closed-Loop	Baseline	10.5247	17.0069	1.05772	0.0821609	7.62007	18.3859
Closed-Loop	Baseline	17.5525	15.865	0.892005	0.0760135	5.36593	11.9059
Closed-Loop	Baseline	15.6244	13.5187	0.90227	0.0285446	5.93284	11.5912
Closed-Loop	Baseline	16.8296	14.706	0.568558	0.0687776	4.67877	10.875
Closed-Loop	Baseline	21.259	14.1632	0.967398	0.102872	2.35185	13.7566
Closed-Loop	Baseline	17.3925	18.3605	0.659104	0.104703	5.05022	15.0612
Closed-Loop	Baseline	9.74516	16.9545	0.930965	0.0985285	10.1426	17.0048
Closed-Loop	Baseline	23.092	5.93522	0.980553	0.101981	7.7617	14.9921
Closed-Loop	Baseline	15.3805	16.6298	1.12699	0.0825732	5.85641	12.8074
Closed-Loop	Baseline	21.015	15.6013	0.787402	0.0864552	5.58393	13.6889
Closed-Loop	Baseline	29.721	14.4003	0.446793	0.073234	5.26815	12.0641
Closed-Loop	Baseline	16.7244	13.2915	0.961015	0.080921	7.07781	19.5846
Closed-Loop	Baseline	8.76817	18.712	1.11549	0.0905166	4.51481	9.86541
Closed-Loop	Baseline	17.9696	17.2682	1.06649	0.0974475	7.64039	15.1885
Closed-Loop	Baseline	23.6383	13.0145	0.966226	0.0751437	7.63525	18.3897
Closed-Loop	Baseline	30.7993	16.4525	0.86871	0.0722976	6.91024	14.3635
Closed-Loop	Baseline	13.1676	11.2221	1.00637	0.0751918	6.94002	13.222
Closed-Loop	Baseline	23.2741	10.5224	0.750388	0.0872384	5.51959	13.9661
Closed-Loop	Baseline	15.7033	13.7169	0.89556	0.0528418	6.99752	14.5453
Closed-Loop	Baseline	20.3629	17.0966	0.957969	0.0338331	6.80054	17.0488
Closed-Loop	Baseline	32.0105	17.6272	1.10355	0.0691532	5.58159	8.19557
Closed-Loop	Baseline	13.2159	16.7703	1.34271	0.0517933	4.95483	18.2634
Closed-Loop	Baseline	21.283	17.567	0.983896	0.0686852	6.08705	10.2465
Closed-Loop	Baseline	21.3845	16.4228	0.826144	0.0724232	8.73655	13.3107
Closed-Loop	Baseline	25.0219	12.7768	0.896517	0.075386	3.92296	12.9396
Closed-Loop	Baseline	21.1762	17.007	0.601623	0.114226	2.99542	14.5115
Closed-Loop	Baseline	21.6461	18.2707	0.830734	0.077304	7.12193	9.99777
Closed-Loop	Baseline	18.6262	17.7523	0.859656	0.0813619	6.76706	14.8106
Closed-Loop	Baseline	23.3221	18.6094	0.845988	0.0849615	5.61388	18.8142
Closed-Loop	Baseline	16.7198	16.7208	0.896551	0.0539732	6.71078	11.3139
Closed-Loop	Baseline	24.7251	15.6391	0.66897	0.100365	5.41371	13.846
Closed-Loop	Baseline	18.2563	18.4717	1.12301	0.0712365	8.36654	12.7516
Closed-Loop	Baseline	20.9867	15.1296	0.876089	0.0888003	3.74576	14.9252
Closed-Loop	Baseline	18.5234	13.0552	0.855466	0.0535431	4.64005	13.908
Closed-Loop	Baseline	25.4411	14.836	0.88549	0.0499612	5.45324	12.7915
Closed-Loop	Baseline	20.6647	12.0138	0.903678	0.0967045	3.18995	15.3897
Closed-Loop	Baseline	11.0073	13.5004	1.07676	0.0839195	5.27812	18.7962
Closed-Loop	Baseline	27.8208	14.0674	0.800781	0.0628431	8.07629	14.0068
Closed-Loop	Baseline	14.0202	12.4308	0.835461	0.0598733	5.99774	15.6337
Closed-Loop	Baseline	16.7191	14.2012	0.786143	0.10115	5.98817	10.4607
Closed-Loop	Week 2	16.432	11.4576	0.646336	0.0444852	3.91895	9.72766
Closed-Loop	Week 2	19.1893	17.4783	1.01597	0.061526	8.14015	10.9874
Closed-Loop	Week 2	13.8802	6.41581	0.959962	0.0579684	4.25661	11.8533
Closed-Loop	Week 2	14.1742	21.9736	0.744902	0.0921902	6.27378	11.506
Closed-Loop	Week 2	11.2763	16.5153	1.14363	0.0775853	4.78066	14.9184
Closed-Loop	Week 2	17.3208	14.5649	1.20844	0.0782509	6.99601	14.1662
Closed-Loop	Week 2	26.2782	12.8448	0.757329	0.0814382	4.25623	10.414
Closed-Loop	Week 2	28.5881	14.3138	0.807266	0.065052	5.94641	12.7525
Closed-Loop	Week 2	21.4201	14.4443	0.853017	0.0820145	5.70517	14.1687
Closed-Loop	Week 2	19.9988	15.3698	0.83459	0.0654003	3.34739	14.8495
Closed-Loop	Week 2	9.76979	14.5525	1.1568	0.0790926	6.58394	16.2828
Closed-Loop	Week 2	15.8858	13.5378	0.991436	0.0546747	3.65715	10.7262
Closed-Loop	Week 2	14.5409	12.4693	0.909646	0.0323422	5.40414	10.7588
Closed-Loop	Week 2	12.9869	13.4171	0.663462	0.0634204	4.50024	9.99782
Closed-Loop	Week 2	17.0136	13.403	1.11771	0.100371	1.64467	11.8152
Closed-Loop	Week 2	15.0242	16.4439	0.858313	0.0918	5.20389	13.5511
Closed-Loop	Week 2	9.26836	15.1217	1.03511	0.0858933	9.63411	14.7186
Closed-Loop	Week 2	24.3509	4.83665	1.07522	0.0971605	6.20634	12.0558
Closed-Loop	Week 2	13.5401	15.1211	1.2187	0.074898	4.84454	11.792
Closed-Loop	Week 2	18.7631	14.0007	0.844568	0.0728575	5.78593	12.1671
Closed-Loop	Week 2	28.2552	14.7599	0.512269	0.0558395	6.41162	10.4754
Closed-Loop	Week 2	14.3455	11.895	0.977281	0.0564976	6.14046	17.159
Closed-Loop	Week 2	7.0338	17.2672	1.35725	0.0848321	4.31163	8.85467
Closed-Loop	Week 2	17.3198	16.5568	1.22932	0.0858459	7.57507	12.8949
Closed-Loop	Week 2	25.0109	11.5535	1.00244	0.0699667	5.99452	17.1222
Closed-Loop	Week 2	25.6817	15.4784	0.884905	0.0625794	6.1269	12.855
Closed-Loop	Week 2	12.9407	11.0626	1.138	0.0754052	6.60738	12.6097
Closed-Loop	Week 2	19.3088	9.96961	0.852524	0.0813115	6.26899	11.4709
Closed-Loop	Week 2	16.4616	11.7813	1.07846	0.0443634	6.5898	11.5925
Closed-Loop	Week 2	16.6045	16.4402	1.08897	0.0343281	5.75904	15.1679
Closed-Loop	Week 2	29.4822	16.6217	1.24993	0.0637656	5.91558	7.37971
Closed-Loop	Week 2	10.9415	14.5725	1.49892	0.051608	4.36015	15.8743
Closed-Loop	Week 2	20.1176	14.7981	1.06428	0.0651998	5.36994	9.0111
Closed-Loop	Week 2	21.0231	14.7922	0.953087	0.0616621	7.66235	11.352
Closed-Loop	Week 2	21.6403	11.368	0.934154	0.0676255	4.50429	11.4061
Closed-Loop	Week 2	18.4959	14.6344	0.717999	0.101207	3.84583	14.015
Closed-Loop	Week 2	18.6766	16.2798	0.965838	0.072798	5.82986	9.30173
Closed-Loop	Week 2	14.9791	15.3079	0.911566	0.0761881	5.70034	13.3612
Closed-Loop	Week 2	18.9941	16.6887	0.861144	0.0830032	5.65577	16.9482
Closed-Loop	Week 2	16.1472	15.4414	0.982534	0.0508285	6.00841	9.06951
Closed-Loop	Week 2	23.2238	14.8731	0.799819	0.0923733	3.8339	13.0111
Closed-Loop	Week 2	16.7697	15.266	1.13573	0.0777931	7.26301	10.6863
Closed-Loop	Week 2	18.3193	13.125	0.971509	0.0894775	3.35944	13.8448
Closed-Loop	Week 2	17.3035	11.2246	0.918187	0.0461455	3.70602	11.7501
Closed-Loop	Week 2	24.0886	13.6598	0.936678	0.0471427	5.45377	10.9768
Closed-Loop	Week 2	19.8572	11.2428	1.06072	0.0933667	3.07946	13.8483
Closed-Loop	Week 2	8.43537	10.7387	1.08075	0.0807094	6.04033	16.7517
Closed-Loop	Week 2	21.7987	13.4197	0.922888	0.061218	8.42949	13.517
Closed-Loop	Week 2	15.7952	11.0428	0.90695	0.0664074	5.19529	14.3944
Closed-Loop	Week 2	15.4477	12.0737	0.991414	0.0973764	5.63603	9.18811
Closed-Loop	Week 4	13.529	9.85809	0.724886	0.0324132	3.22939	8.46218
Closed-Loop	Week 4	13.7908	13.1297	1.24912	0.0532672	5.25707	8.29298
Closed-Loop	Week 4	8.42133	5.65612	1.14943	0.0539939	3.49737	8.86563
Closed-Loop	Week 4	9.22326	16.974	0.954164	0.0670587	4.09666	9.34619
Closed-Loop	Week 4	10.7367	13.3076	1.27605	0.065354	4.3963	11.4418
Closed-Loop	Week 4	13.9508	11.0659	1.41568	0.0531788	4.59778	10.5781
Closed-Loop	Week 4	19.947	10.1191	0.829759	0.06379	3.58186	8.01368
Closed-Loop	Week 4	21.174	11.3416	1.03919	0.0510338	4.69197	10.065
Closed-Loop	Week 4	17.972	11.0432	0.983469	0.0588216	3.59938	10.6252
Closed-Loop	Week 4	15.4317	12.1956	1.02461	0.0492721	2.44914	11.5306
Closed-Loop	Week 4	9.52885	11.8711	1.36602	0.0658305	4.68607	11.8087
Closed-Loop	Week 4	12.9148	10.5342	1.22463	0.0465471	4.18032	8.18438
Closed-Loop	Week 4	11.7248	9.6663	1.10964	0.0236191	3.2003	9.25847
Closed-Loop	Week 4	12.1958	9.73899	0.81268	0.0512683	1.73986	7.60844
Closed-Loop	Week 4	13.8053	10.3581	1.29881	0.0668155	1.28397	9.5031
Closed-Loop	Week 4	10.42	13.4954	0.993138	0.0703173	4.27529	10.9625
Closed-Loop	Week 4	6.79357	11.4278	1.14575	0.0599543	7.33338	10.8932
Closed-Loop	Week 4	17.4628	4.55438	1.26134	0.0729627	4.79225	10.5183
Closed-Loop	Week 4	10.1965	10.8339	1.42559	0.0503996	3.97406	9.34143
Closed-Loop	Week 4	13.4322	10.6166	0.911571	0.0686988	4.50091	10.8815
Closed-Loop	Week 4	21.2069	10.4452	0.585783	0.0519097	3.28872	7.97198
Closed-Loop	Week 4	12.4863	9.22927	1.21846	0.0521037	4.58021	14.3657
Closed-Loop	Week 4	6.39089	12.3924	1.51529	0.0709393	3.05536	7.37417
Closed-Loop	Week 4	12.937	12.1559	1.42233	0.0686228	5.59465	10.3998
Closed-Loop	Week 4	18.8048	9.02305	1.28979	0.0567651	4.69625	13.4583
Closed-Loop	Week 4	20.4877	11.2611	1.1234	0.0506964	4.97132	9.68764
Closed-Loop	Week 4	7.9927	7.34041	1.37085	0.0573275	3.41624	10.0677
Closed-Loop	Week 4	14.814	6.54245	0.957382	0.0707787	3.89147	9.24465
Closed-Loop	Week 4	13.9343	8.88046	1.21843	0.0394485	5.13326	8.50078
Closed-Loop	Week 4	13.3552	12.5399	1.31633	0.0252971	4.33026	11.6439
Closed-Loop	Week 4	23.0118	11.1278	1.42054	0.040018	3.85775	5.83632
Closed-Loop	Week 4	8.43977	11.3276	1.78177	0.0341098	3.82115	12.6385
Closed-Loop	Week 4	16.7922	11.7596	1.21632	0.0482725	4.13567	7.27978
Closed-Loop	Week 4	17.2629	12.2781	1.05927	0.0543979	5.9117	9.94284
Closed-Loop	Week 4	20.019	8.96038	1.08304	0.0440035	2.41757	8.07327
Closed-Loop	Week 4	14.1839	11.5985	0.805407	0.0883929	2.55579	10.9018
Closed-Loop	Week 4	15.3738	12.2515	1.08436	0.0681564	4.67811	6.09429
Closed-Loop	Week 4	11.1126	11.0187	1.06687	0.0632172	4.33192	10.9887
Closed-Loop	Week 4	16.4189	13.3808	1.09983	0.0650711	4.08874	13.2953
Closed-Loop	Week 4	11.631	12.0951	1.19018	0.0389953	4.56826	7.62425
Closed-Loop	Week 4	16.3923	11.4922	1.02583	0.065788	4.32294	9.70004
Closed-Loop	Week 4	11.6091	14.7104	1.33122	0.0553267	4.73939	9.28126
Closed-Loop	Week 4	14.731	9.40225	1.1743	0.0666755	3.09859	11.0662
Closed-Loop	Week 4	13.0603	9.51041	1.01863	0.0347852	3.16195	10.1253
Closed-Loop	Week 4	17.3333	10.0138	1.09672	0.0359183	4.30433	8.61264
Closed-Loop	Week 4	13.281	9.07937	1.11874	0.0666742	3.07328	10.9437
Closed-Loop	Week 4	7.24612	9.05937	1.39119	0.0517307	3.32952	12.6042
Closed-Loop	Week 4	19.2501	9.98439	1.03978	0.0390694	5.58982	9.8937
Closed-Loop	Week 4	9.72507	8.551	1.065	0.0417567	4.07766	11.8843
Closed-Loop	Week 4	11.9324	10.018	1.18682	0.0811945	4.05036	8.07208
Closed-Loop	Week 8	9.00214	6.08724	0.876321	0.0283794	2.65835	5.12789
Closed-Loop	Week 8	11.4807	8.74602	1.36414	0.0325479	4.76269	6.14673
Closed-Loop	Week 8	4.77967	3.67778	1.31164	0.0308324	2.59054	6.57029
Closed-Loop	Week 8	7.75547	12.2613	1.20766	0.0451828	3.65962	5.53849
Closed-Loop	Week 8	7.46579	9.74841	1.54335	0.0485593	3.63413	8.83114
Closed-Loop	Week 8	8.48754	7.99145	1.58351	0.0491176	3.45223	7.20725
Closed-Loop	Week 8	13.1695	7.11441	1.04747	0.0473184	2.00098	5.03401
Closed-Loop	Week 8	15.2951	8.15628	1.11948	0.0388563	3.10264	6.46446
Closed-Loop	Week 8	11.2943	8.05214	1.2603	0.0393816	4.07371	6.72583
Closed-Loop	Week 8	10.0426	8.12052	1.21468	0.0448316	1.74098	7.74746
Closed-Loop	Week 8	5.88633	7.75623	1.57341	0.0459807	3.37489	8.62117
Closed-Loop	Week 8	8.89479	6.75846	1.39548	0.0438785	2.82331	6.70776
Closed-Loop	Week 8	7.83627	7.00903	1.20765	0.0112202	2.8016	5.72349
Closed-Loop	Week 8	7.69209	7.35212	0.872909	0.0367672	1.76309	5.5169
Closed-Loop	Week 8	10.6283	7.15933	1.4562	0.0553847	1.63918	6.90772
Closed-Loop	Week 8	10.4752	8.99267	1.10724	0.0524946	4.01675	7.64848
Closed-Loop	Week 8	4.56819	7.91746	1.31098	0.0485756	4.90753	8.19545
Closed-Loop	Week 8	11.2576	3.39354	1.45028	0.0479965	3.13642	6.30741
Closed-Loop	Week 8	7.80935	7.82529	1.72467	0.0452936	2.21107	7.32565
Closed-Loop	Week 8	10.2401	8.18012	1.09028	0.0455788	2.93182	8.0933
Closed-Loop	Week 8	15.0458	6.97083	0.684797	0.0292421	3.56879	5.11474
Closed-Loop	Week 8	8.44119	6.541	1.34197	0.0436165	3.64792	9.09991
Closed-Loop	Week 8	1.76493	8.45278	1.71277	0.0520087	2.11319	4.85052
Closed-Loop	Week 8	10.6033	8.67059	1.69124	0.0527103	3.54111	6.74866
Closed-Loop	Week 8	12.8251	6.82834	1.43614	0.0390035	2.99045	9.78249
Closed-Loop	Week 8	14.4844	8.36839	1.23743	0.0382684	3.95601	6.64436
Closed-Loop	Week 8	6.83689	6.53173	1.51071	0.0356968	3.78574	7.84498
Closed-Loop	Week 8	11.2042	5.69164	1.02966	0.0461622	2.24185	7.14847
Closed-Loop	Week 8	7.10552	6.00809	1.40364	0.0147995	4.29957	6.8808
Closed-Loop	Week 8	11.2301	8.6282	1.5593	0.0214205	3.7309	9.22955
Closed-Loop	Week 8	16.6522	8.53959	1.52452	0.0266872	3.43427	4.78812
Closed-Loop	Week 8	6.68558	8.93492	1.9804	0.03531	1.89873	8.63482
Closed-Loop	Week 8	11.5859	7.98925	1.48867	0.033268	2.39348	4.81194
Closed-Loop	Week 8	10.1481	8.72112	1.17274	0.0374639	4.08728	6.70576
Closed-Loop	Week 8	13.1879	6.98425	1.35348	0.0323288	2.32206	6.89426
Closed-Loop	Week 8	9.97732	9.06269	0.998854	0.0530845	2.79754	7.80522
Closed-Loop	Week 8	11.6169	8.49577	1.19431	0.0503601	3.47661	4.21385
Closed-Loop	Week 8	6.89365	8.9876	1.40133	0.0305657	2.91683	7.1763
Closed-Loop	Week 8	10.5737	10.4242	1.14865	0.0526069	2.61682	9.4934
Closed-Loop	Week 8	8.5392	8.25363	1.43722	0.0303018	3.79797	5.2582
Closed-Loop	Week 8	11.9862	7.25965	1.15632	0.044356	2.35025	8.2234
Closed-Loop	Week 8	9.54602	8.16522	1.64083	0.0338658	4.93163	5.47953
Closed-Loop	Week 8	10.2351	7.81657	1.37211	0.0550868	1.65713	7.78515
Closed-Loop	Week 8	9.21467	5.23561	1.31125	0.0245539	3.17392	7.76849
Closed-Loop	Week 8	12.7045	7.06924	1.28767	0.0186957	3.26202	7.33387
Closed-Loop	Week 8	8.97487	6.6013	1.29202	0.0538655	1.69911	7.40764
Closed-Loop	Week 8	6.4094	6.57982	1.56581	0.0454569	2.60841	9.50115
Closed-Loop	Week 8	12.7856	7.49594	1.1698	0.0262899	4.07565	7.04625
Closed-Loop	Week 8	4.82868	6.42252	1.23386	0.0323865	3.22982	7.99744
Closed-Loop	Week 8	7.99076	7.67749	1.33457	0.0461256	3.2116	5.33399
Closed-Loop	3-mo FU	8.22137	3.82048	0.960443	0.0120326	2.07742	4.41452
Closed-Loop	3-mo FU	6.36319	8.67581	1.42257	0.0252845	2.99015	5.16571
Closed-Loop	3-mo FU	5.54032	3.98158	1.45644	0.0313929	1.4697	5.22839
Closed-Loop	3-mo FU	5.87264	9.57715	1.24085	0.0396105	3.32403	4.23905
Closed-Loop	3-mo FU	5.38968	7.27668	1.62323	0.0335349	1.52804	6.96189
Closed-Loop	3-mo FU	10.3327	5.68206	1.63834	0.0270526	2.55431	7.26396
Closed-Loop	3-mo FU	10.7901	6.78199	1.11523	0.0399711	2.09055	4.30852
Closed-Loop	3-mo FU	12.0595	7.29131	1.21311	0.0271172	2.35801	5.48247
Closed-Loop	3-mo FU	11.2677	6.70369	1.34101	0.0241741	2.335	6.2849
Closed-Loop	3-mo FU	8.16963	7.28602	1.12704	0.0371472	1.9966	6.89634
Closed-Loop	3-mo FU	3.84777	6.75437	1.66081	0.0389148	3.19092	7.77691
Closed-Loop	3-mo FU	6.76763	5.43913	1.41725	0.0275962	2.45939	3.95597
Closed-Loop	3-mo FU	7.26517	5.55728	1.33674	0.0136348	1.76994	5.15483
Closed-Loop	3-mo FU	6.96611	5.88444	0.980293	0.0362974	1.66131	4.63763
Closed-Loop	3-mo FU	6.37109	5.53884	1.65648	0.0445037	1.45998	5.29491
Closed-Loop	3-mo FU	6.52365	7.2512	1.03174	0.0439298	2.73271	6.2357
Closed-Loop	3-mo FU	3.43405	6.66657	1.47952	0.0382358	3.16114	7.10206
Closed-Loop	3-mo FU	9.4186	2.43109	1.38191	0.048449	3.0465	5.96021
Closed-Loop	3-mo FU	6.28036	6.81321	1.71827	0.0343132	1.39933	4.70864
Closed-Loop	3-mo FU	8.8967	5.70338	1.20734	0.0345488	2.26573	6.16184
Closed-Loop	3-mo FU	10.3722	5.61904	0.686228	0.0207085	3.36236	4.73251
Closed-Loop	3-mo FU	7.22517	4.89149	1.42543	0.0309062	2.25433	7.72598
Closed-Loop	3-mo FU	3.19199	7.83784	1.86223	0.0327664	1.27435	4.02894
Closed-Loop	3-mo FU	8.81252	6.08421	1.84074	0.0384397	3.45061	5.70962
Closed-Loop	3-mo FU	10.6461	5.64934	1.39873	0.0268076	2.05783	8.21946
Closed-Loop	3-mo FU	13.018	7.18164	1.26944	0.0230673	2.51453	5.56494
Closed-Loop	3-mo FU	6.00745	4.68292	1.70858	0.0426281	2.96131	4.85019
Closed-Loop	3-mo FU	10.3396	3.04289	1.29923	0.0434663	2.09463	5.04579
Closed-Loop	3-mo FU	7.59163	5.06728	1.54915	0.030051	2.68573	5.50896
Closed-Loop	3-mo FU	7.69019	7.00278	1.49936	0.00751608	3.12718	7.58746
Closed-Loop	3-mo FU	15.5611	6.63845	1.79924	0.027952	2.39835	3.68969
Closed-Loop	3-mo FU	5.8831	6.35809	2.18204	0.0157668	2.18925	6.70817
Closed-Loop	3-mo FU	9.08122	7.63521	1.56813	0.0244564	2.29155	5.41864
Closed-Loop	3-mo FU	7.65908	6.95188	1.27723	0.0262271	3.51444	5.46574
Closed-Loop	3-mo FU	8.88327	4.76794	1.43141	0.0345719	1.59467	5.80845
Closed-Loop	3-mo FU	8.48868	5.71951	1.0074	0.0416386	1.74839	6.1127
Closed-Loop	3-mo FU	8.76162	6.79698	1.28981	0.0399559	2.25039	4.26856
Closed-Loop	3-mo FU	6.60258	6.79842	1.41432	0.0374244	2.33925	6.48191
Closed-Loop	3-mo FU	8.67924	7.6748	1.35819	0.0484959	2.00903	8.23341
Closed-Loop	3-mo FU	8.90224	6.58231	1.4227	0.0154921	2.52887	4.76551
Closed-Loop	3-mo FU	9.93855	6.67749	1.31144	0.0466091	1.86058	6.2258
Closed-Loop	3-mo FU	6.11977	8.25176	1.7247	0.0371261	2.73689	4.78047
Closed-Loop	3-mo FU	8.64269	6.37593	1.4744	0.032497	1.56879	5.74001
Closed-Loop	3-mo FU	7.13651	4.91771	1.51109	0.0284608	2.00927	5.78545
Closed-Loop	3-mo FU	9.8644	5.71274	1.30573	0.0212507	2.72948	5.42508
Closed-Loop	3-mo FU	7.4836	4.92778	1.47545	0.0374057	1.19852	5.97651
Closed-Loop	3-mo FU	3.97629	5.78011	1.61145	0.0308916	2.49851	7.93693
Closed-Loop	3-mo FU	9.26871	5.51292	1.1535	0.021188	3.67228	6.1354
Closed-Loop	3-mo FU	6.06088	5.07171	1.29939	0.0352918	2.63492	5.8616
Closed-Loop	3-mo FU	6.13186	5.65605	1.49268	0.0410069	2.12559	3.88827
Control	Baseline	17.9313	12.4134	0.76295	0.0776407	8.47744	12.6653
Control	Baseline	22.1306	9.19641	0.989198	0.0758884	5.2038	12.9893
Control	Baseline	14.6728	16.0414	0.890495	0.0547169	8.23518	13.3496
Control	Baseline	26.1311	21.3505	0.672554	0.0894399	2.46246	14.1135
Control	Baseline	21.6321	16.3131	0.988229	0.0622711	6.45043	16.7462
Control	Baseline	20.8306	14.8147	1.03321	0.076513	4.33182	14.0222
Control	Baseline	12.8431	16.3412	0.808222	0.0710252	3.74893	12.6697
Control	Baseline	12.0154	15.1064	0.92416	0.0666124	6.05878	18.5827
Control	Baseline	20.4201	12.0855	0.849465	0.0785159	7.91313	14.503
Control	Baseline	9.5357	17.6291	0.838127	0.066506	3.80292	15.7762
Control	Baseline	24.9841	15.1814	0.791807	0.070399	3.77422	12.4495
Control	Baseline	18.6301	14.7364	0.6124	0.0693999	6.1414	15.1546
Control	Baseline	35.7346	12.1686	0.830442	0.0849036	6.79717	14.9232
Control	Baseline	32.2357	19.0591	0.78694	0.11184	6.5816	8.27811
Control	Baseline	18.5751	16.3995	0.817608	0.0877296	7.58662	18.4776
Control	Baseline	19.3802	13.8682	0.670405	0.0963625	5.00895	17.6913
Control	Baseline	27.1478	18.2915	0.809633	0.0444815	7.58728	12.9409
Control	Baseline	27.0922	13.1549	0.933529	0.0823521	6.75874	10.9825
Control	Baseline	9.95801	11.8852	0.941156	0.0556318	5.47758	14.1896
Control	Baseline	11.8517	12.6484	0.937755	0.0456303	4.17191	13.6769
Control	Baseline	16.2112	9.46382	0.814867	0.0643357	4.91931	13.8783
Control	Baseline	22.5955	16.4712	1.02098	0.106296	5.75537	14.4283
Control	Baseline	21.7032	9.32501	0.679536	0.0989539	8.37487	14.9664
Control	Baseline	25.0891	10.3109	1.06307	0.086395	6.90358	17.135
Control	Baseline	15.6001	8.57906	1.04052	0.058413	4.36924	15.3862
Control	Baseline	9.22141	14.589	1.05495	0.07436	6.26266	11.5578
Control	Baseline	25.1523	14.8659	0.857468	0.0874257	6.22186	18.453
Control	Baseline	14.4428	13.6708	0.82087	0.0809647	8.96983	17.3456
Control	Baseline	8.75641	12.7116	1.10893	0.0388923	7.02583	22.4598
Control	Baseline	17.8862	10.5275	0.750148	0.0592691	7.39351	11.6778
Control	Baseline	23.1565	17.0487	0.748941	0.0763247	5.30861	14.2177
Control	Baseline	20.3464	13.2362	0.820954	0.0925232	5.99274	8.89637
Control	Baseline	18.2277	16.3789	1.08285	0.0478228	8.5918	15.1541
Control	Baseline	18.9817	12.3842	0.973863	0.0731773	3.82718	12.7223
Control	Baseline	18.1248	16.113	0.799358	0.0807778	6.20248	19.5632
Control	Baseline	12.5709	18.7162	0.853665	0.0966766	4.80203	12.3663
Control	Baseline	16.6314	16.2092	0.838796	0.0958361	5.64778	10.0313
Control	Baseline	23.3723	14.473	0.87545	0.0929692	8.29137	12.6067
Control	Baseline	19.9925	15.7149	1.0659	0.0704217	4.80959	8.31925
Control	Baseline	21.1399	14.3888	0.709821	0.029708	2.76389	15.7735
Control	Baseline	15.9567	15.641	1.06537	0.0602043	5.39427	9.4406
Control	Baseline	18.6774	13.5072	0.892698	0.0975532	6.59865	13.3076
Control	Baseline	9.81538	14.8047	1.08305	0.113356	6.88859	8.27793
Control	Baseline	23.707	15.3413	0.825818	0.0863827	7.74039	13.2624
Control	Baseline	27.0399	11.9538	0.85177	0.0735487	5.8265	17.6161
Control	Baseline	13.0226	11.9885	0.697204	0.0904487	4.0527	14.5054
Control	Baseline	16.3323	10.0843	0.81828	0.0700959	7.31061	11.6295
Control	Baseline	21.8268	9.80977	1.03044	0.0719478	4.85391	13.2392
Control	Baseline	26.7245	12.0237	1.09872	0.108454	9.38091	13.558
Control	Baseline	17.9537	15.9215	0.69658	0.0563001	6.30995	15.5333
Control	Week 2	17.0258	12.4792	0.798127	0.0753936	7.89403	11.8813
Control	Week 2	18.8633	8.99651	1.06824	0.074569	5.43081	11.6977
Control	Week 2	15.8783	14.6583	0.944706	0.0436944	7.93398	12.5765
Control	Week 2	26.1549	19.9079	0.615713	0.08057	3.8281	12.9113
Control	Week 2	20.8174	15.3362	1.0752	0.0544866	6.8638	15.6837
Control	Week 2	18.7228	14.5266	1.11651	0.0755978	4.61534	14.0704
Control	Week 2	12.2238	15.3216	0.755049	0.0733559	3.08975	11.0273
Control	Week 2	11.0042	13.8061	1.00813	0.0702494	6.54032	18.6493
Control	Week 2	20.8295	12.0712	0.757179	0.0800817	6.84394	12.9689
Control	Week 2	9.25361	17.1941	0.83548	0.0777176	4.02816	15.2356
Control	Week 2	23.4007	14.5951	0.755864	0.0660346	3.47494	12.2514
Control	Week 2	19.2547	15.3492	0.693031	0.0563772	5.11272	13.8771
Control	Week 2	33.2772	11.2074	0.89781	0.0863214	5.36669	14.4651
Control	Week 2	31.0905	17.9812	0.828035	0.109507	6.65338	8.19749
Control	Week 2	18.2926	15.8082	0.864823	0.0791951	7.22734	18.8123
Control	Week 2	18.1583	12.7858	0.647598	0.0968631	5.16642	16.3724
Control	Week 2	23.7091	16.2341	0.950501	0.0512017	8.10024	12.0585
Control	Week 2	26.9828	12.5589	0.933111	0.0854166	6.5567	10.5325
Control	Week 2	12.4396	11.4752	1.0007	0.0616249	5.45454	14.5299
Control	Week 2	9.43804	12.1525	1.02104	0.0506595	4.44105	13.2137
Control	Week 2	15.2828	9.69968	0.794427	0.066181	5.91577	13.77
Control	Week 2	22.8043	15.9169	1.07291	0.101216	5.7928	13.6442
Control	Week 2	20.7646	7.84541	0.777271	0.0917445	6.3745	13.9138
Control	Week 2	24.9819	11.77	0.979575	0.0843999	6.74097	17.6476
Control	Week 2	15.0009	8.48221	1.13627	0.0399062	3.99285	14.366
Control	Week 2	7.59652	13.6165	0.996602	0.0775401	5.66997	11.2229
Control	Week 2	23.7569	13.9002	0.824045	0.0757597	6.74094	16.6408
Control	Week 2	13.9124	13.407	0.75027	0.0807642	8.35005	16.7042
Control	Week 2	10.1669	10.9452	1.11952	0.0367422	7.21511	20.7832
Control	Week 2	19.8885	11.0081	0.692804	0.0618509	6.34497	11.0237
Control	Week 2	23.2406	15.2697	0.764551	0.0746129	6.15685	13.7827
Control	Week 2	17.7747	12.4787	0.917178	0.0782157	5.93455	8.95157
Control	Week 2	15.1641	14.8085	1.1986	0.0363771	7.58889	15.1245
Control	Week 2	18.7463	11.0107	0.991186	0.07003	3.64912	12.4575
Control	Week 2	15.1763	14.8389	0.775503	0.0831237	5.09262	17.6384
Control	Week 2	12.2794	18.257	0.921134	0.0921493	4.98221	10.9204
Control	Week 2	16.5464	16.178	0.780397	0.0911414	5.7202	8.9814
Control	Week 2	21.668	13.4846	0.844366	0.082281	8.42566	12.2789
Control	Week 2	22.4763	15.1452	1.12677	0.0578545	3.93877	8.88111
Control	Week 2	20.8234	13.2977	0.762962	0.0374548	1.99498	13.9981
Control	Week 2	13.6191	14.6923	1.10155	0.0728155	5.29769	8.39137
Control	Week 2	18.1652	12.6432	1.03738	0.103418	7.29386	13.4466
Control	Week 2	8.61157	13.3313	1.0729	0.0984498	6.41588	8.22642
Control	Week 2	18.2656	14.3724	0.877081	0.0948847	6.28147	13.1849
Control	Week 2	24.8467	11.959	0.945422	0.0733091	5.50628	17.4139
Control	Week 2	11.4371	11.8261	0.794114	0.0772422	3.76185	14.8116
Control	Week 2	14.1806	10.5363	0.837617	0.0606399	7.13089	11.1412
Control	Week 2	20.6108	10.2252	0.997872	0.0667663	4.93082	13.6946
Control	Week 2	24.7019	10.3411	1.20661	0.0997944	9.24875	14.1603
Control	Week 2	15.198	14.8788	0.785452	0.0601564	6.02989	15.0783
Control	Week 4	16.2762	11.9826	0.871558	0.0627471	7.44858	11.8843
Control	Week 4	19.1306	9.26137	1.06831	0.0707515	4.16732	12.3962
Control	Week 4	15.2943	13.6216	1.06607	0.0393895	6.81982	12.8262
Control	Week 4	24.5742	18.5431	0.640991	0.089049	3.82696	12.5355
Control	Week 4	20.5947	14.3719	1.14583	0.0556411	6.90462	15.1782
Control	Week 4	17.3386	13.0387	1.12184	0.0720925	4.19564	12.9487
Control	Week 4	11.6062	15.1106	0.795595	0.0575149	3.86763	10.7159
Control	Week 4	10.0589	13.3284	1.08896	0.0611361	4.73799	16.4404
Control	Week 4	20.7065	11.0221	0.86916	0.0752329	7.09251	12.3674
Control	Week 4	7.89095	15.4872	1.02396	0.07004	3.85735	13.6546
Control	Week 4	22.6127	14.4688	0.785422	0.0603344	3.53	11.1936
Control	Week 4	16.9787	13.4687	0.692243	0.0601354	5.15213	12.5747
Control	Week 4	33.7399	10.5457	1.04625	0.0718362	5.94217	13.3955
Control	Week 4	25.5481	17.8521	1.0288	0.100501	5.70301	8.33012
Control	Week 4	17.1669	14.8666	0.960524	0.079665	6.99576	17.2078
Control	Week 4	17.4157	12.0249	0.800225	0.0939136	5.18004	15.2429
Control	Week 4	22.0265	16.5311	0.974375	0.0470519	7.82578	13.2447
Control	Week 4	27.3905	11.3409	1.06033	0.0699657	5.61079	10.8
Control	Week 4	9.74154	11.6287	0.983903	0.0554753	4.50949	12.7597
Control	Week 4	10.7331	10.9212	1.00493	0.0455123	3.21733	12.9115
Control	Week 4	15.5571	9.12951	0.875385	0.0470897	5.01409	13.0963
Control	Week 4	21.8838	14.2918	1.02481	0.0973673	5.0665	12.5238
Control	Week 4	19.5687	8.90229	0.806461	0.0889791	6.73866	13.069
Control	Week 4	22.081	10.7361	1.04602	0.0823863	6.42335	16.0725
Control	Week 4	13.6974	8.32663	1.26465	0.038935	4.26961	13.5375
Control	Week 4	8.00267	13.3933	1.07032	0.0525834	5.10723	10.7222
Control	Week 4	20.3161	12.9785	0.897135	0.078826	6.74095	16.1627
Control	Week 4	13.7338	12.3297	0.900337	0.0766175	6.86967	16.9783
Control	Week 4	9.30319	11.4206	1.10865	0.0303584	6.89206	19.2659
Control	Week 4	19.4906	9.98522	0.77888	0.0510818	6.73701	10.3098
Control	Week 4	20.8901	14.2353	0.844477	0.0846227	4.52546	13.4627
Control	Week 4	14.5365	12.3462	0.972295	0.0801252	5.97071	7.67819
Control	Week 4	16.4629	13.9561	1.15467	0.0361245	6.85258	13.4587
Control	Week 4	16.0625	10.6348	1.05436	0.0658285	3.22137	12.1713
Control	Week 4	14.315	13.2671	0.762021	0.0641234	5.60368	17.0415
Control	Week 4	9.10146	16.7774	0.973874	0.0864417	4.03019	11.1751
Control	Week 4	15.5979	15.0413	0.91458	0.0831434	5.50867	8.3883
Control	Week 4	20.4744	12.508	0.897675	0.0804869	7.09865	10.93
Control	Week 4	19.2219	14.6701	1.1516	0.0570279	4.93688	7.87043
Control	Week 4	20.1453	13.1137	0.784401	0.0389773	2.10226	14.228
Control	Week 4	14.1592	13.4258	1.33567	0.0641745	5.42669	7.42145
Control	Week 4	18.7995	12.5218	1.1124	0.0837093	6.89868	12.6591
Control	Week 4	6.81047	13.3114	1.17692	0.0995131	5.03669	7.08067
Control	Week 4	18.7686	14.7089	0.859309	0.075043	5.71332	11.3193
Control	Week 4	22.8131	10.8811	0.921847	0.0694763	4.74109	16.6331
Control	Week 4	11.137	10.5226	0.758421	0.0825294	3.91299	13.7134
Control	Week 4	15.1147	9.2545	0.958627	0.064525	4.78324	10.4612
Control	Week 4	20.1076	8.45667	1.05864	0.0693719	5.54822	12.0209
Control	Week 4	23.6834	10.5465	1.19205	0.095066	8.61404	12.1268
Control	Week 4	16.6064	14.2195	0.786975	0.0514944	6.24462	13.4768
Control	Week 8	16.083	10.502	0.95594	0.052069	6.93785	9.60406
Control	Week 8	18.1587	6.57994	1.10874	0.0559716	4.51439	9.9718
Control	Week 8	13.4052	12.1504	1.13867	0.0452141	5.87553	11.0828
Control	Week 8	20.2553	17.431	0.750058	0.0735589	3.13486	12.1801
Control	Week 8	17.9641	12.6399	1.16118	0.0517236	4.96624	13.3416
Control	Week 8	15.3343	12.1981	1.21887	0.0587543	3.95642	11.0077
Control	Week 8	9.73811	12.6136	0.981021	0.0552429	2.86136	9.87324
Control	Week 8	12.062	11.4585	1.19231	0.0566051	6.33193	13.9436
Control	Week 8	17.9512	9.98709	0.92627	0.0622111	5.99142	11.2526
Control	Week 8	7.62759	14.1304	1.0857	0.0538449	3.08395	12.7457
Control	Week 8	18.7786	12.214	0.856221	0.0617685	2.93409	10.3808
Control	Week 8	15.5788	11.9244	0.731653	0.0513202	4.94947	12.413
Control	Week 8	30.035	9.18939	0.905855	0.0692694	5.53176	11.5704
Control	Week 8	24.856	15.688	1.15984	0.0984958	5.16326	7.34539
Control	Week 8	16.6253	13.4481	1.01618	0.0661354	5.1483	14.8475
Control	Week 8	16.8674	11.3994	0.886782	0.0813838	5.13712	13.2173
Control	Week 8	21.6461	15.1688	1.00512	0.0358618	6.3363	10.5606
Control	Week 8	23.1179	10.7653	1.09172	0.0654258	4.851	8.35867
Control	Week 8	10.0353	9.61897	1.06262	0.0494897	4.25548	11.6878
Control	Week 8	10.2687	9.13376	1.03288	0.0325923	2.8313	10.8758
Control	Week 8	13.9593	7.01342	1.07323	0.0531743	4.82939	12.1862
Control	Week 8	17.8297	12.4448	1.22918	0.0835743	4.05452	12.4839
Control	Week 8	17.539	8.29449	0.81669	0.0794067	5.8155	11.5617
Control	Week 8	20.5176	9.10965	1.14575	0.0730739	5.34785	13.1681
Control	Week 8	9.91065	7.21339	1.35714	0.041149	3.45956	12.2738
Control	Week 8	6.59217	10.6832	1.16729	0.0682499	5.05562	9.10854
Control	Week 8	20.5286	11.0402	0.981739	0.0638593	5.82384	14.0345
Control	Week 8	10.496	11.6595	1.04762	0.0674882	7.05556	14.2581
Control	Week 8	9.46053	9.6412	1.30305	0.0349216	6.06132	17.4038
Control	Week 8	17.7026	9.11304	0.850786	0.0444086	5.93981	9.13677
Control	Week 8	18.7129	13.3969	0.941164	0.0677562	4.08099	12.206
Control	Week 8	16.0552	11.4966	1.12816	0.084204	5.29109	6.05828
Control	Week 8	14.1718	12.6487	1.41203	0.0287769	6.53916	12.1218
Control	Week 8	16.5925	9.91009	1.11402	0.0639311	3.56514	10.2105
Control	Week 8	15.5004	12.5308	0.986946	0.0667114	4.0345	14.5879
Control	Week 8	9.20774	16.3239	1.0433	0.0740259	3.5434	10.5164
Control	Week 8	13.7285	12.3571	0.994377	0.0659819	4.96793	7.50393
Control	Week 8	17.8795	11.3518	0.867624	0.0697923	6.54447	10.2368
Control	Week 8	17.3695	12.5599	1.24768	0.0442412	4.60057	7.52704
Control	Week 8	15.9441	11.7058	0.792445	0.0419925	1.7279	12.4066
Control	Week 8	13.7675	11.6902	1.41098	0.0571356	4.75932	6.14655
Control	Week 8	16.314	11.1941	1.28264	0.0782965	5.95791	11.0426
Control	Week 8	6.55197	11.9613	1.17263	0.090741	5.38301	7.5591
Control	Week 8	15.3793	14.0655	0.995569	0.06976	5.20813	10.391
Control	Week 8	21.3298	10.02	1.1091	0.0670351	4.83731	14.0635
Control	Week 8	10.538	9.13786	0.812699	0.0704146	3.42795	12.3841
Control	Week 8	13.8965	8.45562	1.02201	0.0602459	6.55627	9.30763
Control	Week 8	18.5696	7.93264	1.18642	0.0644275	3.37275	10.8825
Control	Week 8	21.8013	8.1807	1.33037	0.0919467	7.67997	11.3108
Control	Week 8	15.1767	12.2177	0.867146	0.0493097	5.22001	12.5306
Control	3-mo FU	16.8553	9.2836	0.944737	0.0518195	5.89086	9.8993
Control	3-mo FU	16.9808	6.25301	1.27541	0.0622051	4.14085	10.0534
Control	3-mo FU	14.1927	11.2765	1.12506	0.0309031	5.22534	10.0114
Control	3-mo FU	19.5648	15.4753	0.713322	0.0643455	3.49247	9.91218
Control	3-mo FU	15.5644	11.0606	1.20986	0.0401049	5.0565	12.0759
Control	3-mo FU	15.2103	12.2112	1.22809	0.0556949	4.23041	10.7478
Control	3-mo FU	9.72251	12.601	0.92503	0.0529895	2.64456	9.1099
Control	3-mo FU	8.98718	10.8355	1.26547	0.0487304	4.48406	14.3744
Control	3-mo FU	15.8785	9.55693	0.924152	0.0602037	5.25356	11.1375
Control	3-mo FU	7.40208	13.3111	1.15274	0.0521281	3.98753	11.5675
Control	3-mo FU	19.1578	12.3535	0.855072	0.0534709	2.45889	8.37591
Control	3-mo FU	14.9112	10.8803	0.775777	0.0415858	4.71897	11.1702
Control	3-mo FU	27.4526	9.60148	0.97772	0.071609	4.21041	11.2301
Control	3-mo FU	23.1477	13.9089	1.09077	0.0832861	4.12888	7.08162
Control	3-mo FU	13.8057	12.0776	1.04075	0.0596539	5.28314	14.1153
Control	3-mo FU	13.4023	10.368	0.930009	0.0828865	3.8436	12.9823
Control	3-mo FU	20.5182	14.1495	1.06118	0.0329354	6.60439	10.513
Control	3-mo FU	21.4003	11.4244	1.11557	0.0567385	4.15706	8.62411
Control	3-mo FU	8.63254	8.89063	1.17079	0.0380584	4.57326	10.965
Control	3-mo FU	7.3723	9.89013	1.16973	0.0375068	2.64145	10.4125
Control	3-mo FU	15.603	7.0602	1.00927	0.0510676	4.11571	11.082
Control	3-mo FU	16.1119	12.7026	1.34424	0.0815769	4.44951	11.6776
Control	3-mo FU	16.4344	6.39468	0.87858	0.0871102	6.0623	11.3576
Control	3-mo FU	19.4275	7.85462	1.22731	0.0523979	5.01024	13.2038
Control	3-mo FU	11.1013	6.19199	1.37038	0.0400532	2.78761	11.324
Control	3-mo FU	7.27239	11.0958	1.12783	0.0542701	3.8068	9.08139
Control	3-mo FU	20.0252	10.5912	1.06009	0.0615934	4.91245	14.0347
Control	3-mo FU	12.4004	10.8445	1.0132	0.0595342	5.91043	13.8015
Control	3-mo FU	6.37464	9.41765	1.33207	0.0277992	5.55197	16.4515
Control	3-mo FU	15.287	8.91226	0.917858	0.0550679	5.18338	8.41184
Control	3-mo FU	18.2822	13.1042	0.904515	0.0632503	4.91156	9.76325
Control	3-mo FU	16.6105	10.2192	1.02556	0.0681603	4.63036	6.96864
Control	3-mo FU	11.8853	11.3534	1.33143	0.0338132	5.87717	11.6042
Control	3-mo FU	15.605	9.93988	1.15613	0.0500055	3.59262	9.6863
Control	3-mo FU	13.7902	11.3548	0.926132	0.0554922	4.27779	13.7507
Control	3-mo FU	10.7827	14.6376	1.10536	0.0618543	3.60084	8.85537
Control	3-mo FU	12.218	13.3557	0.957123	0.0668958	4.62558	7.12727
Control	3-mo FU	16.1124	10.5504	1.01331	0.0695471	5.56738	10.1272
Control	3-mo FU	16.9572	11.0806	1.22345	0.0485152	3.4031	6.60658
Control	3-mo FU	16.2847	10.2494	0.839731	0.0321267	1.5404	12.9496
Control	3-mo FU	12.2403	11.9291	1.41017	0.0470489	4.41408	6.8434
Control	3-mo FU	14.3061	10.4328	1.36404	0.0790403	5.41671	9.91552
Control	3-mo FU	6.23618	10.92	1.3158	0.0821	4.42995	6.53983
Control	3-mo FU	14.1105	12.1066	0.928137	0.0743235	5.86579	9.5736
Control	3-mo FU	21.1776	9.3631	0.996942	0.0569763	4.34499	12.4841
Control	3-mo FU	9.89589	9.10367	0.857986	0.067252	2.35762	11.976
Control	3-mo FU	11.837	8.02145	1.05731	0.0457194	4.85878	9.23252
Control	3-mo FU	15.6956	7.49306	1.23633	0.0560625	3.61688	10.7081
Control	3-mo FU	19.2314	8.94006	1.37639	0.0877079	7.8094	10.6165
Control	3-mo FU	11.8362	11.8856	0.975521	0.0463171	4.58776	10.6952
