# Supplementary material for: Identifying Neural Tipping Points of Freezing of Gait in Parkinson’s Disease: An EEG-Based Early Warning and Closed-Loop Stimulation Study
Source: Research Square preprint supplement (doi:10.21203/rs.3.rs-7814436/v1), 2025-11-14
Supplement: Supplementary file 3 [file d6b7c467df2bfca38fb39534.xlsx]

## Sheet: Baseline Table
Variable	Closed-Loop (n=50)	Control (n=50)	Total (n=100)	P-value
Sex (overall)				0.156
└─ Male	33 (66.0%)	25 (50.0%)	58 (58.0%)
└─ Female	17 (34.0%)	25 (50.0%)	42 (42.0%)
Hoehn–Yahr Stage (overall)				0.896
└─ 2.0	12 (24.0%)	12 (24.0%)	24 (24.0%)
└─ 2.5	14 (28.0%)	16 (32.0%)	30 (30.0%)
└─ 3.0	24 (48.0%)	22 (44.0%)	46 (46.0%)
Handedness (overall)				0.523
└─ Right	46 (92.0%)	43 (86.0%)	89 (89.0%)
└─ Left	4 (8.0%)	7 (14.0%)	11 (11.0%)
Test State (Medication) (overall)				0.186
└─ ON	32 (64.0%)	39 (78.0%)	71 (71.0%)
└─ OFF	18 (36.0%)	11 (22.0%)	29 (29.0%)
Cueing Device Use: Yes	16 (32.0%)	17 (34.0%)	33 (33.0%)	1.000
Fall History (past 6 mo): Yes	19 (38.0%)	21 (42.0%)	40 (40.0%)	0.838
Hypertension: Yes	18 (36.0%)	26 (52.0%)	44 (44.0%)	0.158
Diabetes: Yes	6 (12.0%)	8 (16.0%)	14 (14.0%)	0.773
Medication Stable (≥4 weeks): Yes	44 (88.0%)	43 (86.0%)	87 (87.0%)	1.000
Age (years)	64.4 ± 6.5	66.1 ± 6.1	65.3 ± 6.4	0.182
Disease Duration (years)	5.3 ± 2.1	4.9 ± 2.1	5.1 ± 2.1	0.280
BMI	24.2 ± 2.7	23.5 ± 2.8	23.9 ± 2.8	0.256
UPDRS-III Total	35.7 ± 8.0	35.0 ± 8.5	35.4 ± 8.2	0.675
UPDRS-III Gait Subscore	5.9 ± 2.2	5.5 ± 1.6	5.7 ± 1.9	0.227
FOG-Q Total	14.2 ± 3.8	14.1 ± 4.4	14.2 ± 4.1	0.960
FOG Episodes / Week	19.9 ± 9.3	18.6 ± 9.2	19.2 ± 9.2	0.499
MoCA	25.4 ± 2.5	25.2 ± 2.6	25.3 ± 2.6	0.705
LEDD (mg/day)	793.5 ± 231.4	708.8 ± 244.0	751.1 ± 240.4	0.078
EEG Beta Power (z)	0.2 ± 1.0	0.1 ± 0.9	0.2 ± 0.9	0.562
EEG Lag-1 Autocorr	0.2 ± 0.1	0.2 ± 0.1	0.2 ± 0.1	0.717
EEG Beta Burst Rate (Hz)	1.4 ± 0.5	1.5 ± 0.4	1.5 ± 0.4	0.258
DBS Implant (overall)				1.000
└─ No	50 (100.0%)	50 (100.0%)	100 (100.0%)

## Sheet: Raw Data (Simulated)
ID	Group	Age (years)	Sex	Disease Duration (years)	Hoehn–Yahr Stage	UPDRS-III Total	UPDRS-III Gait Subscore	FOG-Q Total	FOG Episodes / Week	MoCA	LEDD (mg/day)	Cueing Device Use	Fall History (past 6 mo)	Hypertension	Diabetes	BMI	Handedness	Test State (Medication)	Medication Stable (≥4 weeks)	DBS Implant	EEG Beta Power (z)	EEG Lag-1 Autocorr	EEG Beta Burst Rate (Hz)
P001	Closed-Loop	69.477	Male	5.026	2	34.8479	4.93948	15.3504	45.7336	22.1518	1055.13	No	Yes	Yes	No	20.7231	Right	ON	Yes	No	-0.482744	0.240982	0.59843
P002	Closed-Loop	65.0321	Male	7.90707	3	26.9798	4.41425	12.3525	20.5922	30	557.313	No	No	No	No	23.0508	Right	OFF	Yes	No	-0.953329	0.175874	0.707932
P003	Closed-Loop	70.5338	Male	4.47069	2	34.8519	5.78594	12.0496	20.1393	26.48	491.911	No	Yes	Yes	No	27.6393	Right	OFF	Yes	No	0.12267	0.267257	1.63356
P004	Closed-Loop	76.6612	Male	10.4403	2.5	32.6907	3.92952	12.2698	19.7587	25.5545	817.854	Yes	Yes	No	No	24.4252	Right	ON	Yes	No	1.62468	0.389988	1.75436
P005	Closed-Loop	64.3609	Female	6.25133	3	37.5817	4.8927	15.5778	21.9808	22.4249	561.944	No	Yes	No	No	30.958	Right	ON	Yes	No	0.323079	0.186737	0.709405
P006	Closed-Loop	64.361	Male	3.28568	2.5	28.3822	3.60424	12.3161	18.5564	27.1009	858.233	No	No	Yes	Yes	25.18	Left	OFF	Yes	No	-0.252354	0.102547	1.94752
P007	Closed-Loop	77.0545	Male	2.85822	2.5	39.1548	9.92945	15.1591	14.2634	23.2731	750.731	No	No	No	No	24.5761	Right	OFF	Yes	No	-0.291811	0.310708	1.25847
P008	Closed-Loop	71.372	Female	5.96494	3	47.2619	6.07053	22.3016	14.5314	25.366	321.064	No	No	Yes	No	23.0727	Right	ON	No	No	-1.56319	0.187962	1.5734
P009	Closed-Loop	62.7137	Male	4.55307	2.5	34.1299	4.60055	17.4845	19.6725	30	1086.88	No	No	No	No	24.4006	Right	ON	Yes	No	0.88311	0	2.30611
P010	Closed-Loop	69.7979	Female	6.428	2.5	38.2137	6.42796	12.6959	14.5658	24.7118	1148.97	No	No	Yes	No	23.5426	Right	ON	Yes	No	-0.0778372	0.284742	1.94842
P011	Closed-Loop	62.7561	Female	5.94648	3	40.5212	5.77534	18.8049	12.8715	28.4478	546.803	Yes	Yes	No	No	26.1243	Right	ON	No	No	-0.18048	0.146467	1.36573
P012	Closed-Loop	62.7399	Male	4.85434	2.5	31.7902	5.55806	12.3677	21.0643	22.8905	603.075	Yes	Yes	No	No	26.8701	Right	ON	Yes	No	3	0.190947	1.0544
P013	Closed-Loop	67.6937	Male	3.30641	3	36.7927	7.22833	6	17.4502	24.895	771.466	No	No	No	Yes	21.642	Right	ON	Yes	No	0.298753	0.233198	0.5
P014	Closed-Loop	52.607	Male	1.97031	3	35.1007	7.51502	9.96765	35.0399	30	783.614	No	Yes	No	No	20.0063	Left	OFF	Yes	No	-0.751791	0.21905	1.14042
P015	Closed-Loop	53.9256	Male	4.10697	2	35.7814	4.939	6.51683	5	23.1191	864.636	No	No	No	No	18.4914	Right	ON	Yes	No	-0.426358	0.270945	1.39443
P016	Closed-Loop	62.064	Male	6.7128	2	28.8159	4.84836	12.5939	30.9151	30	1202.55	No	No	No	No	25.524	Right	OFF	Yes	No	1.14845	0.156451	1.00641
P017	Closed-Loop	58.9102	Female	5.42819	2	35.1961	5.4499	14.0737	32.4609	27.1233	655.763	Yes	No	No	No	20.6899	Right	ON	Yes	No	0.11327	0.251311	1.43437
P018	Closed-Loop	68.1997	Male	2.50852	2	38.984	2	20.7057	5	23.3126	500.426	Yes	No	No	No	18	Right	ON	Yes	No	-1.43828	0.174045	1.53843
P019	Closed-Loop	59.6438	Male	5.34636	2	46.6091	2.96962	15.3077	16.5731	26.8972	355.17	No	No	Yes	No	25.1657	Right	ON	Yes	No	0.919229	0.273881	1.38757
P020	Closed-Loop	56.1139	Male	5.77063	3	42.6742	8.73375	13.1236	16.2856	27.9177	517.267	No	No	No	No	31.479	Right	ON	Yes	No	-0.668144	0.261537	1.175
P021	Closed-Loop	76.2595	Female	3.23229	2	52.2255	9.28994	17.3176	5.92488	26.8654	691.718	Yes	No	No	No	23.9818	Right	OFF	Yes	No	1.8733	0.106456	1.58433
P022	Closed-Loop	64.4196	Male	5.30745	2.5	28.8612	5.50193	6	12.2218	20.2893	1148.64	No	No	No	No	26.5155	Right	OFF	Yes	No	1.08005	0.308598	1.72097
P023	Closed-Loop	66.4727	Male	5.11642	3	41.9786	7.15311	14.9425	8.89424	22.8186	570.597	Yes	Yes	Yes	No	24.2455	Right	ON	Yes	No	-0.447322	0.146404	0.9548
P024	Closed-Loop	56.0268	Male	2.71406	2	36.4667	6.6225	17.0835	37.5227	24.2574	755.947	No	No	No	No	23.7033	Right	ON	Yes	No	1.28102	0.280806	2.20547
P025	Closed-Loop	62.1893	Female	5.71557	3	52.5184	12	8.08566	29.3568	24.7767	695.894	Yes	No	Yes	No	26.7572	Right	OFF	Yes	No	0.0678555	0.236729	1.45071
P026	Closed-Loop	66.7765	Male	6.12157	2.5	28.5336	8.23915	18.575	32.7156	26.862	997.098	No	Yes	No	No	23.1292	Right	ON	Yes	No	0.852774	0.383818	1.50942
P027	Closed-Loop	57.943	Female	7.1661	2	28.2822	5.74416	15.354	27.2167	25.5331	1331.73	No	No	Yes	No	24.8022	Right	ON	Yes	No	0.484733	0.177653	1.85411
P028	Closed-Loop	68.6299	Female	7.1076	3	30.2049	4.08892	12.3388	8.70948	20.994	567.283	No	No	No	No	24.9651	Right	OFF	Yes	No	-0.846357	0.165068	1.61661
P029	Closed-Loop	61.7955	Male	2.24466	3	18.0088	2.78711	16.5311	14.7548	26.1406	577.64	Yes	No	No	No	21.9957	Right	ON	No	No	-0.64355	0.198058	1.97657
P030	Closed-Loop	63.9581	Female	3.12435	3	30.794	6.40693	23.0828	24.8937	26.8318	961.04	Yes	Yes	Yes	No	26.9761	Right	ON	Yes	No	1.02996	0.169682	1.64356
P031	Closed-Loop	61.7881	Male	6.03007	3	28.9269	4.4873	14.7275	7.77872	26.6794	870.473	No	No	No	No	23.4751	Right	ON	Yes	No	-0.334775	0.279994	1.19378
P032	Closed-Loop	78.9659	Female	6.02757	3	36.2032	3.15549	14.9929	27.13	28.2423	1161.68	No	No	Yes	Yes	21.7328	Right	OFF	Yes	No	-0.403648	0.0383689	1.68075
P033	Closed-Loop	65.9055	Female	6.0301	2.5	37.734	4.70685	12.1626	17.5967	27.5018	845.982	No	Yes	No	No	25.6095	Left	ON	Yes	No	-0.955123	0.0946318	0.928137
P034	Closed-Loop	58.596	Male	12	2	50.0094	3.8369	10.6006	16.2518	26.3775	610.177	Yes	Yes	No	No	21.3046	Right	ON	Yes	No	0.423599	0.0932197	1.55428
P035	Closed-Loop	71.7578	Male	6.14178	3	42.6034	9.37428	17.3213	27.1096	24.7895	847.664	No	No	No	No	24.0845	Right	OFF	No	No	2.06252	0.295031	1.48339
P036	Closed-Loop	57.4541	Female	7.27113	3	30.3848	7.76328	10.5757	24.4426	20.0171	977.176	No	Yes	No	No	23.9726	Right	ON	Yes	No	-1.06753	0.371061	1.39594
P037	Closed-Loop	67.462	Male	6.908	3	27.8127	5.98405	14.2863	16.3903	26.2889	905.121	No	No	No	No	27.2577	Right	OFF	Yes	No	0.0242195	0.189555	1.43573
P038	Closed-Loop	52.2823	Male	6.30278	2.5	38.9354	8.95989	12.0894	31.5933	25.6231	826.819	Yes	No	Yes	No	25.4241	Right	ON	Yes	No	1.41222	0.183118	0.559075
P039	Closed-Loop	56.7027	Male	4.36946	2.5	24.4381	6.15474	15.9159	9.18937	25.8147	966.669	No	Yes	Yes	No	23.9249	Right	OFF	Yes	No	-0.0796414	0.207005	1.22564
P040	Closed-Loop	67.378	Male	6.51794	3	49.6517	4.27743	15.3346	26.1594	21.1698	992.324	Yes	No	No	Yes	26.4533	Right	ON	Yes	No	0.452372	0.316188	1.54642
P041	Closed-Loop	71.1693	Female	3.45435	2.5	44.4355	9.04625	18.1502	25.931	21.7568	1045.54	Yes	No	No	Yes	28.1706	Right	ON	Yes	No	-1.06239	0.107265	1.57993
P042	Closed-Loop	67.1996	Male	4.52636	3	31.2466	7.07782	11.9599	16.9045	28.1595	862.177	No	No	No	No	25.6734	Right	ON	Yes	No	0.428307	0.223837	0.986162
P043	Closed-Loop	65.1905	Male	4.02927	3	21.2949	3.92551	12.9205	23.2613	24.8813	658.22	Yes	Yes	No	No	24.0311	Right	ON	Yes	No	-0.187144	0.29752	2.13285
P044	Closed-Loop	63.8923	Male	5.16375	2.5	45.831	5.61932	10.0849	7.48886	27.0445	736.678	No	No	Yes	No	20.0645	Right	OFF	Yes	No	0.98573	0.250109	1.06691
P045	Closed-Loop	55.6503	Female	9.62932	3	34.0837	4.24876	12.2228	29.2403	25.085	1001.63	No	Yes	No	No	20.8047	Right	OFF	No	No	1.18739	0.218958	1.98473
P046	Closed-Loop	60.9611	Male	1.26547	3	44.9025	3.2344	15.5092	18.151	25.0893	495.766	No	Yes	Yes	No	23.0843	Right	ON	Yes	No	2.58956	0.300105	1.7136
P047	Closed-Loop	62.7755	Female	6.37252	2	22.2446	7.85236	17.028	14.7728	27.8149	792.168	No	No	No	No	22.1715	Right	ON	Yes	No	0.579633	0	1.17689
P048	Closed-Loop	73.3999	Male	1.77457	3	30.205	9.81883	10.3113	30.4901	23.4519	601.665	Yes	Yes	Yes	No	23.4391	Left	OFF	Yes	No	0.325796	0.267788	2.38766
P049	Closed-Loop	68.4053	Female	4.05614	2.5	35.0419	3.20286	17.4784	12.9566	25.2884	707.186	No	No	Yes	No	24.1699	Right	OFF	Yes	No	0.194384	0.134592	0.903182
P050	Closed-Loop	53.6587	Male	7.1779	3	35.3758	7.12594	19.4226	5.91539	23.6132	1019.61	No	Yes	Yes	Yes	25.5891	Right	ON	No	No	-0.353166	0.0169367	1.95958
P051	Control	68.2686	Male	5.12856	2.5	31.3995	4.69871	15.6537	5	23.6965	747.775	Yes	No	Yes	No	23.7885	Right	ON	Yes	No	0.338484	0.25112	2.00029
P052	Control	63.3044	Male	2.84451	3	39.9828	5.02575	21.5072	26.0601	24.0725	711.609	No	Yes	No	No	25.4595	Right	ON	Yes	No	-0.295401	0.337366	1.16469
P053	Control	61.2615	Female	3.56939	2.5	26.459	4.81521	10.9048	7.19571	25.6664	360.036	Yes	No	Yes	No	24.1934	Right	ON	No	No	0.168461	0.186255	2.19623
P054	Control	70.2817	Female	6.3592	2	33.861	4.27202	9.02138	37.5479	23.5638	886.563	Yes	No	Yes	No	18.0736	Right	ON	Yes	No	1.3176	0.295287	1.37498
P055	Control	73.217	Male	3.53927	3	35.9624	6.09704	6.88512	5	28.7673	861.371	No	Yes	Yes	No	21.182	Right	ON	No	No	-1.00654	0.361228	1.64435
P056	Control	72.519	Female	5.43292	2	39.1155	4.3381	19.9842	36.9646	22.3162	1240.81	Yes	Yes	Yes	No	23.5677	Right	ON	Yes	No	1.13988	0.331491	1.63016
P057	Control	60.1255	Female	5.09114	2.5	40.6929	6.54091	16.6175	22.1102	24.4394	623.055	No	Yes	Yes	Yes	20.3709	Right	OFF	Yes	No	1.31712	0.363996	1.43285
P058	Control	63.8355	Male	3.6968	3	26.0029	5.89952	13.7777	19.0329	23.6808	754.788	No	No	Yes	Yes	25.7998	Right	ON	Yes	No	-0.118069	0.274213	1.9054
P059	Control	68.3188	Male	9.28789	3	22.7271	5.5221	15.1199	14.5508	29.3409	762.346	No	Yes	No	No	28.5923	Right	ON	Yes	No	-2.12185	0.207543	1.89674
P060	Control	72.8288	Male	6.26784	2.5	45.2214	4.18487	9.49804	23.9914	25.5897	1094.36	Yes	No	No	No	27.6563	Left	ON	No	No	-0.607822	0.0398034	0.625734
P061	Control	62.6458	Male	1	3	37.6585	4.84646	23.783	19.6237	28.0955	676.176	Yes	No	No	No	23.3597	Right	ON	Yes	No	1.29699	0.175394	2.15217
P062	Control	64.7004	Female	5.37291	2.5	29.0121	7.51078	14.5169	31.033	20.5433	769.755	Yes	Yes	No	Yes	28.4722	Right	ON	Yes	No	-0.0228681	0.115675	0.668754
P063	Control	58.2557	Female	3.67643	2.5	47.4092	7.00183	14.4376	21.1423	25.8012	851.974	No	No	Yes	Yes	24.446	Left	ON	Yes	No	-0.999302	0.417094	2.01627
P064	Control	57.6266	Female	6.70487	2.5	35.9254	4.04489	16.9031	21.503	27.6689	746.652	No	No	No	No	22.9887	Right	ON	Yes	No	-0.504775	0.182411	2.06335
P065	Control	71.6877	Male	3.41496	3	44.4344	6.19866	15.924	16.3639	25.2469	588.392	Yes	Yes	No	No	22.1598	Right	ON	Yes	No	0.84062	0.21232	0.954517
P066	Control	75.4937	Male	4.77053	3	35.5401	7.50277	14.8955	19.4305	28.1964	748.522	No	Yes	No	No	23.0926	Right	ON	No	No	0.546734	0.255149	1.29459
P067	Control	65.4959	Female	6.00997	3	51.486	2.66119	10.8381	23.078	23.4481	968.408	Yes	Yes	Yes	No	22.8355	Right	ON	Yes	No	-0.238932	0.20436	0.947148
P068	Control	73.0247	Female	6.73151	3	49.0427	7.08672	15.8859	5	29.228	443.371	No	No	Yes	No	24.5112	Right	OFF	Yes	No	-0.366824	0.369505	1.39254
P069	Control	68.5315	Female	2.59941	2	33.0083	4.67475	21.5281	6.51815	30	733.242	No	No	Yes	Yes	24.4817	Right	ON	Yes	No	-0.391758	0.137735	1.34598
P070	Control	61.4842	Female	4.331	2.5	42.7726	7.1412	19.3817	27.4326	23.9115	524.97	No	No	Yes	No	24.0091	Right	OFF	Yes	No	-0.92241	0.219461	1.88983
P071	Control	68.5298	Female	4.05011	2	40.163	4.47348	20.3727	21.7087	23.6635	998.762	No	No	No	Yes	25.3108	Left	ON	Yes	No	1.61538	0.125753	2.15515
P072	Control	76.7663	Male	3.69334	2.5	45.9491	2.39024	11.9551	18.1602	29.3602	319.203	No	No	No	No	27.5719	Right	ON	Yes	No	-0.32232	0.0679977	2.19784
P073	Control	65.7492	Male	8.53091	2.5	27.2806	2.74492	10.0416	20.1843	29.7387	560.27	No	No	No	No	26.8487	Right	ON	No	No	1.21716	0.138823	1.21892
P074	Control	76.9525	Female	5.80996	3	40.4884	6.09617	13.4969	23.4758	23.4314	794.303	No	No	No	No	19.5453	Right	ON	Yes	No	1.52132	0.196296	1.39539
P075	Control	47.6618	Female	2.47823	2.5	43.4674	6.51945	14.2229	14.6024	23.7394	1091.38	Yes	Yes	No	No	18	Right	OFF	Yes	No	0.998311	0.15707	0.658281
P076	Control	71.7533	Male	6.83572	2	20.9301	4.19137	18.3768	12.217	24.1546	683.562	No	Yes	No	No	26.803	Right	OFF	Yes	No	-0.43162	0.130758	1.09706
P077	Control	66.6093	Male	9.24431	2	25.5339	7.27718	7.23014	21.9585	20.9666	561.2	No	Yes	No	No	19.8994	Left	OFF	No	No	0.40373	0.0593683	1.98243
P078	Control	63.9069	Female	7.06493	3	18.6861	2.67696	20.1182	10.2163	22.244	1170.29	No	Yes	Yes	No	23.3257	Right	ON	Yes	No	-0.0241956	0.191689	2.30779
P079	Control	66.6423	Male	1.96126	3	32.8447	5.86784	13.368	24.0825	21.9876	337.997	No	No	Yes	No	20.4897	Right	ON	Yes	No	-0.903702	0.049528	0.882826
P080	Control	52.087	Male	4.03153	2	40.7403	3.57797	12.2925	5	22.6966	200	No	No	Yes	No	18.5941	Right	ON	Yes	No	0.324359	0.276006	1.20377
P081	Control	64.4623	Male	7.53382	2	47.0189	4.69633	9.95158	30.2916	24.8959	810.004	No	Yes	No	No	25.6244	Right	ON	Yes	No	-1.17904	0.208244	1.4868
P082	Control	68.4998	Female	3.58466	3	35.5928	6.0948	7.38057	24.726	25.7026	574.486	No	Yes	No	No	26.2775	Right	ON	Yes	No	1.18768	0.0542449	1.64008
P083	Control	76.3453	Female	5.88764	2	48.0289	4.27917	17.2927	22.5603	29.6515	444.692	Yes	No	Yes	No	22.2705	Right	ON	Yes	No	-0.464617	0.169079	1.0952
P084	Control	62.3721	Male	6.54927	3	23.9592	5.23089	14.2933	29.8269	22.0049	877.089	Yes	No	No	No	18	Right	ON	Yes	No	0.20116	0.124784	1.71203
P085	Control	60.3405	Female	3.14614	3	21.3729	8.01259	8.84016	36.6547	27.953	760.95	Yes	Yes	Yes	No	22.3613	Right	ON	Yes	No	0.283288	0.231917	1.26308
P086	Control	62.4877	Male	4.88095	2	34.5556	4.84622	8.81968	30.1437	24.358	558.98	Yes	No	No	Yes	25.1754	Right	OFF	No	No	-0.258905	0.334045	1.49277
P087	Control	72.4078	Male	1	2	38.0725	7.67138	12.6569	5	24.8516	379.924	No	Yes	Yes	No	19.5633	Left	OFF	Yes	No	0.586694	0.0124828	1.77314
P088	Control	68.3013	Female	2.95122	3	34.7384	3.74059	20.6761	7.20423	27.0245	918.114	Yes	Yes	Yes	No	24.5501	Right	OFF	Yes	No	-0.474904	0.211503	1.50321
P089	Control	62.2917	Female	4.49486	2.5	18.4605	7.05961	12.9616	13.7518	21.6318	862.55	No	No	No	No	23.9541	Right	ON	Yes	No	0.871297	0.183987	1.28181
P090	Control	69.5929	Female	2.50443	2.5	34.287	8.88314	7.98743	20.2609	26.1472	675.206	No	No	Yes	No	25.7379	Right	ON	Yes	No	-1.34598	0.267134	1.4452
P091	Control	66.6795	Female	8.26482	3	24.5642	2	13.017	25.1766	25.4994	1161.66	Yes	Yes	Yes	No	24.3587	Right	ON	Yes	No	0.12638	0.22132	1.45582
P092	Control	72.7805	Male	2.13972	3	40.3574	4.40621	12.9091	12.7426	26.4774	432.479	No	No	Yes	No	21.0808	Right	OFF	Yes	No	1.93893	0.124803	1.31499
P093	Control	61.0856	Male	4.11991	3	37.9328	7.15414	6	21.8677	25.8675	318.619	No	No	No	Yes	27.5897	Right	ON	Yes	No	-1.00033	0.168095	1.3706
P094	Control	63.7064	Male	5.26148	3	27.481	5.59391	13.7828	12.4462	30	527.023	No	No	No	No	23.5244	Right	ON	Yes	No	-0.677745	0.120397	2.29932
P095	Control	63.2552	Male	7.88255	2.5	30.8891	6.74229	13.0763	13.8848	23.0868	688.603	No	No	Yes	No	23.9181	Right	OFF	Yes	No	0.513908	0.307601	1.78046
P096	Control	55.7554	Male	2.12828	2	26.5263	4.79203	16.7848	5.93339	23.407	760.835	No	No	No	No	21.2002	Right	ON	Yes	No	0.179582	0.202131	1.35226
P097	Control	68.0728	Female	7.32633	3	34.4986	6.17318	21.3958	10.7677	23.1306	639.691	Yes	No	No	No	22.6702	Left	ON	Yes	No	0.35063	0.390119	1.84848
P098	Control	67.8274	Male	5.02047	2.5	42.6411	5.68865	18.5063	6.48315	23.3336	788.014	No	No	Yes	No	21.3456	Left	ON	Yes	No	0.489187	0.193934	1.33309
P099	Control	66.0358	Female	3.03698	2.5	27.1142	8.33556	12.9244	10.2413	23.0878	387.115	No	Yes	Yes	No	23.4812	Right	ON	Yes	No	0.634721	0.129159	2.08656
P100	Control	64.3579	Female	5.92421	3	39.0324	6.50884	9.5739	30.5364	28.567	1060.94	No	Yes	Yes	No	29.1351	Right	ON	Yes	No	1.1097	0.0486286	1.68482
